# Supplementary material for: Catalyst-free four-component domino synthetic approach toward versatile multicyclic spirooxindole pyran scaffolds
Source: Royal Society of Chemistry journal article supplement (doi:10.1039/c9ra03214b), 2019-01-01
Supplement: c9ra03214b1.pdf [file c9ra03214b1.pdf]

## Supporting Information

### Catalyst-free four-component domino synthetic approach toward versatile multicyclic spirooxindole pyran scaffolds

Aref Mohammadi, Mohammad Bayat\*, Shima Nasri

*Department of Chemistry, Imam Khomeini International University, Qazvin, Iran.*

*bayat\_mo@yahoo.com*

#### The Table of Contents

| Title                                                                       | Page  |
|-----------------------------------------------------------------------------|-------|
| Title, author's name, address and table of contents                         | 1     |
| General remarks and <b>FIGURE 1</b> .                                       | 2     |
| <sup>1</sup> H and <sup>13</sup> C NMR and IR and Mass spectra of <b>5a</b> | 3-6   |
| <sup>1</sup> H and <sup>13</sup> C NMR spectra of <b>5b</b>                 | 7-8   |
| <sup>1</sup> H and <sup>13</sup> C NMR spectra of <b>5c</b>                 | 9-10  |
| <sup>1</sup> H and <sup>13</sup> C NMR and IR and Mass spectra of <b>5d</b> | 11-14 |
| <sup>1</sup> H and <sup>13</sup> C NMR and Mass spectra of <b>5e</b>        | 15-17 |
| <sup>1</sup> H and <sup>13</sup> C NMR and Mass spectra of <b>5f</b>        | 18-20 |
| <sup>1</sup> H and <sup>13</sup> C NMR spectra of <b>5g</b>                 | 21-22 |
| <sup>1</sup> H and <sup>13</sup> C NMR spectra of <b>5h</b>                 | 23-24 |
| <sup>1</sup> H and <sup>13</sup> C NMR and IR spectra of <b>5i</b>          | 25-27 |
| <sup>1</sup> H and <sup>13</sup> C NMR and IR and Mass spectra of <b>5j</b> | 28-31 |
| <sup>1</sup> H and <sup>13</sup> C NMR and IR and Mass spectra of <b>5k</b> | 32-35 |
| <sup>1</sup> H and <sup>13</sup> C NMR spectra of <b>5l</b>                 | 36-37 |
| <sup>1</sup> H and <sup>13</sup> C NMR spectra of <b>5m</b>                 | 38-39 |
| <sup>1</sup> H and <sup>13</sup> C NMR spectra of <b>5n</b>                 | 40-41 |
| <sup>1</sup> H and <sup>13</sup> C NMR spectra of <b>5o</b>                 | 42-43 |
| <sup>1</sup> H NMR and IR spectra of <b>5p</b>                              | 44-45 |
| <sup>1</sup> H and <sup>13</sup> C NMR spectra of <b>5q</b>                 | 46-47 |

## Experimental Section

### General remarks:

The nitroketene dithioacetals, isatin derivatives, various amines, various active methylene compounds and solvents were obtained from Sigma Aldrich and Fluka Co. which used without further purification. IR spectra: Bruker Tensor 27 spectrometer. NMR spectra: Bruker DRX-300 Avance instrument (300 MHz for  $^1\text{H}$  and 75.4 MHz for  $^{13}\text{C}$ ) with  $\text{DMSO-}d_6$  as solvents. Chemical shifts are expressed in parts per million (ppm), and coupling constant ( $J$ ) are reported in hertz (Hz). Mass spectra: Agilent 5975C VL MSD with Triple-Axis detector operating at an ionization potential of 70 eV. Elemental analyses for C, H and N: Heraeus CHNO-Rapid analyzer. Melting points: electrothermal 9100 apparatus.

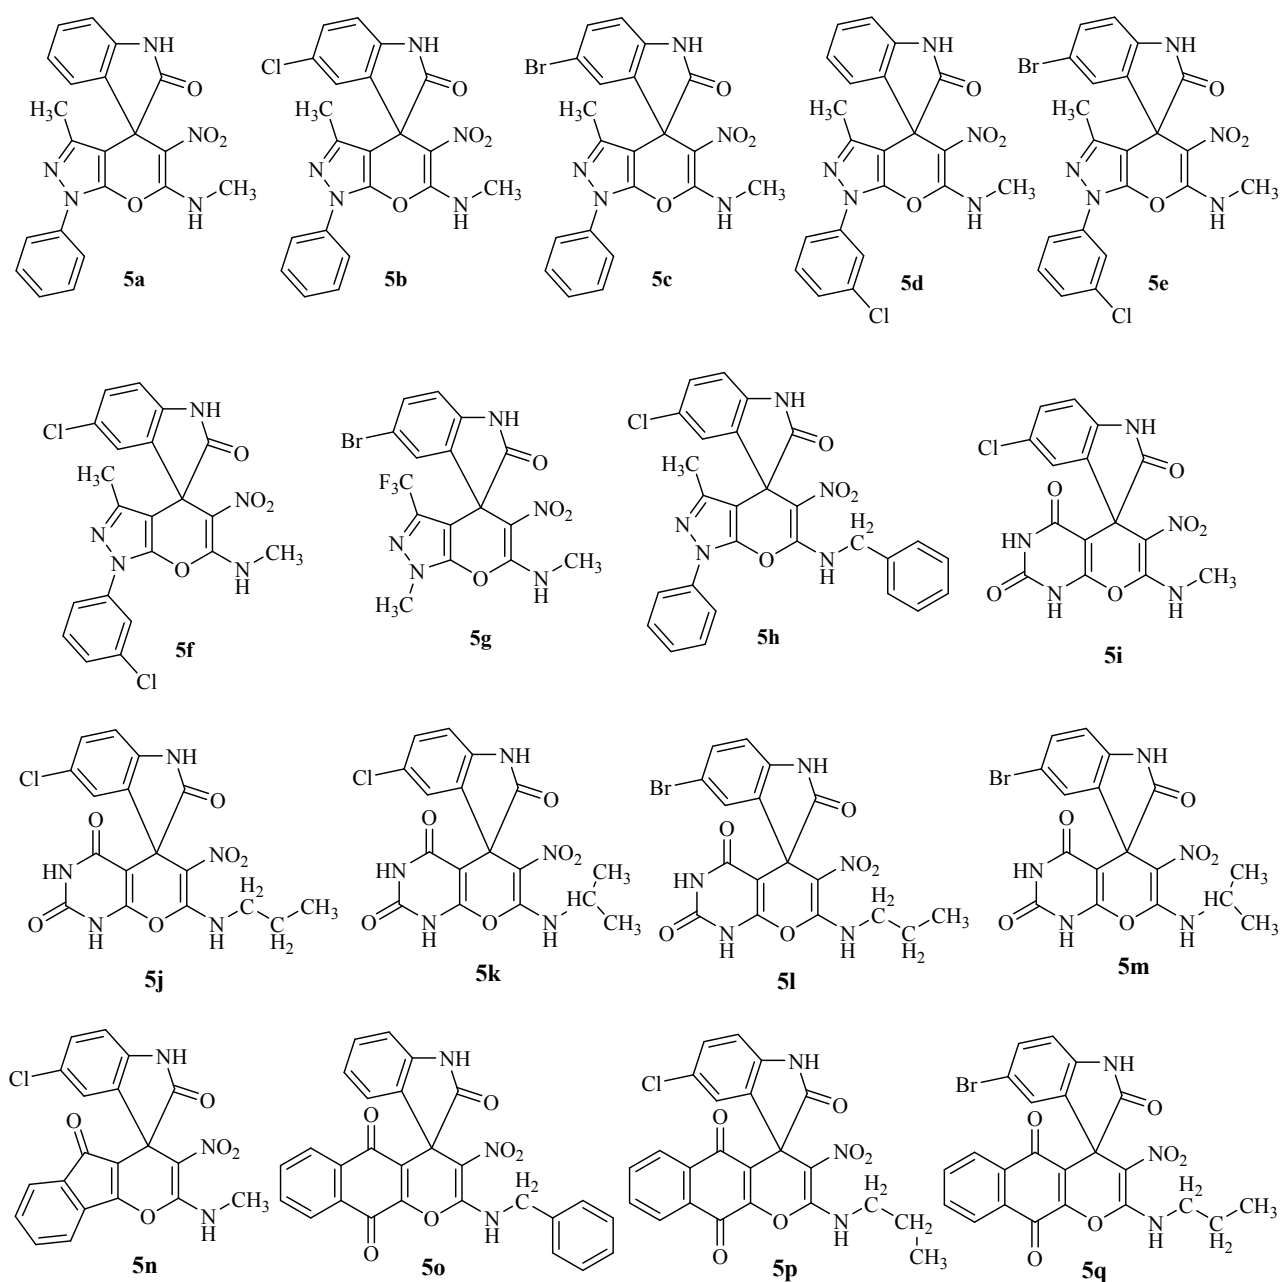

FIGURE 1. Structure of all products 5a-q.

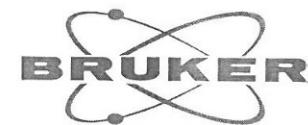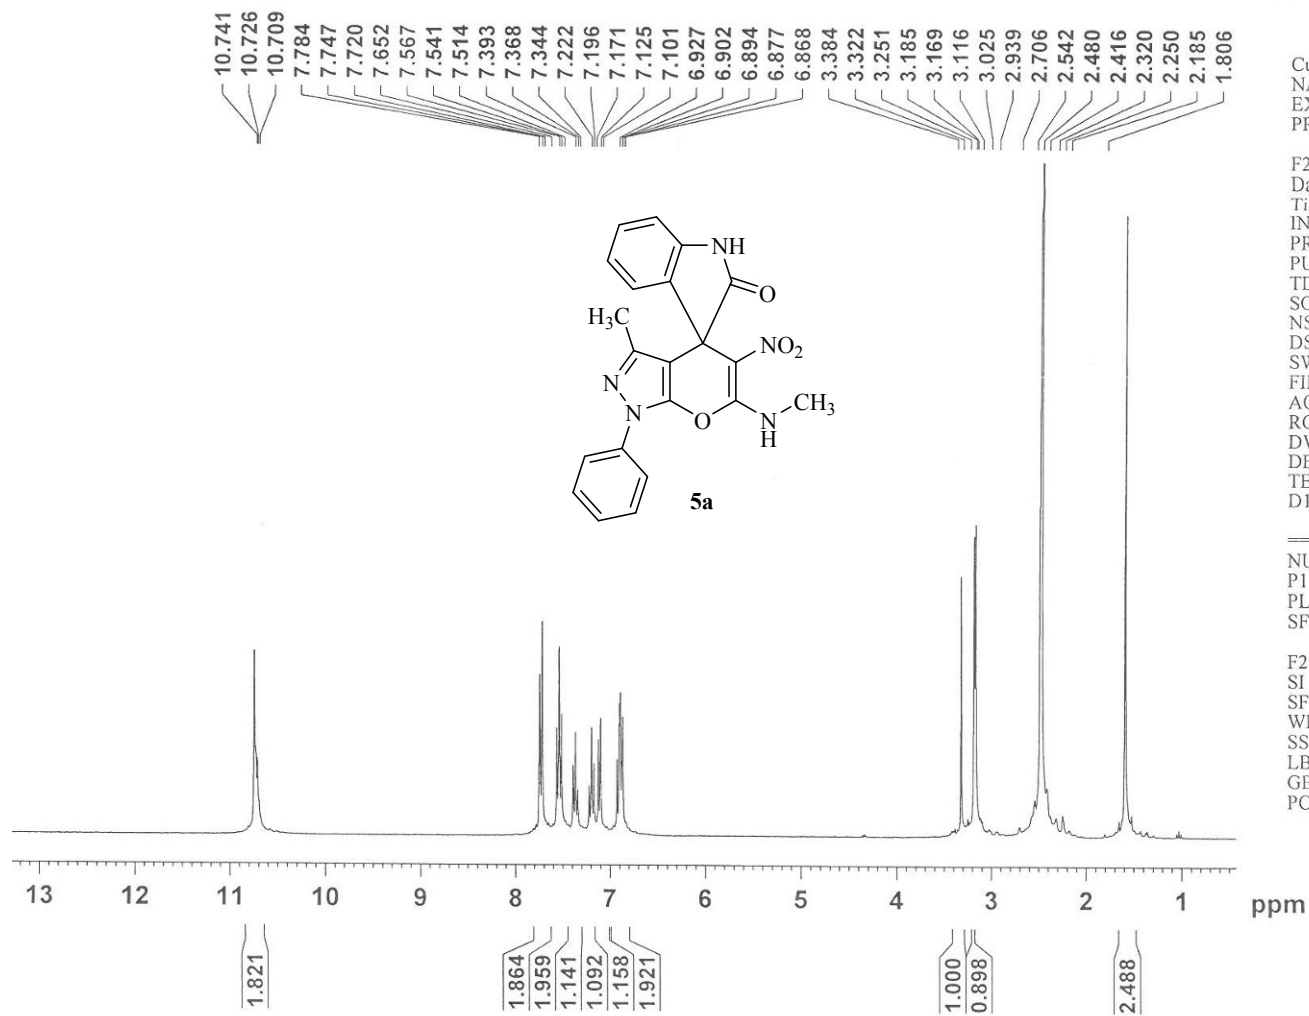

Current Data Parameters  
NAME AA.Mohamadi  
EXPNO 52  
PROCNO 1

F2 - Acquisition Parameters  
Date 20170120  
Time 12.25  
INSTRUM spect  
PROBHD 5 mm BBO BB-1H  
PULPROG zg  
TD 16384  
SOLVENT DMSO  
NS 6  
DS 0  
SWH 5995.204 Hz  
FIDRES 0.365918 Hz  
AQ 1.3664756 sec  
RG 256  
DW 83.400 usec  
DE 6.00 usec  
TE 300.0 K  
D1 6.00000000 sec

==== CHANNEL f1 =====  
NUC1 1H  
P1 9.00 usec  
PL1 3.00 dB  
SFO1 299.8729987 MHz

F2 - Processing parameters  
SI 32768  
SF 299.8700035 MHz  
WDW EM  
SSB 0  
LB 0.30 Hz  
GB 0  
PC 1.00

<sup>1</sup>H NMR of 5a

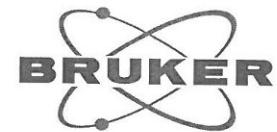

Current Data Parameters  
NAME AA.Mohamadi  
EXPNO 66  
PROCNO 1

F2 - Acquisition Parameters  
Date\_ 20170202  
Time 12.36  
INSTRUM spect  
PROBHD 5 mm BBO BB-1H  
PULPROG zgpg  
TD 65536  
SOLVENT DMSO  
NS 500  
DS 0  
SWH 17985.611 Hz  
FIDRES 0.274439 Hz  
AQ 1.8219508 sec  
RG 32768  
DW 27.800 usec  
DE 6.00 usec  
TE 300.0 K  
D1 4.00000000 sec  
d11 0.03000000 sec  
d12 0.00002000 sec

===== CHANNEL f1 =====  
NUC1 13C  
P1 14.00 usec  
PL1 -6.00 dB  
SFO1 75.4099117 MHz

===== CHANNEL f2 =====  
CPDPRG2 waltz16  
NUC2 1H  
PCPD2 80.00 usec  
PL2 3.00 dB  
PL12 23.00 dB  
PL13 23.00 dB  
SFO2 299.8711995 MHz

F2 - Processing parameters  
SI 32768  
SF 75.4023710 MHz  
WDX EM  
SSB 0  
LB 1.00 Hz  
GB 0  
PC 1.40

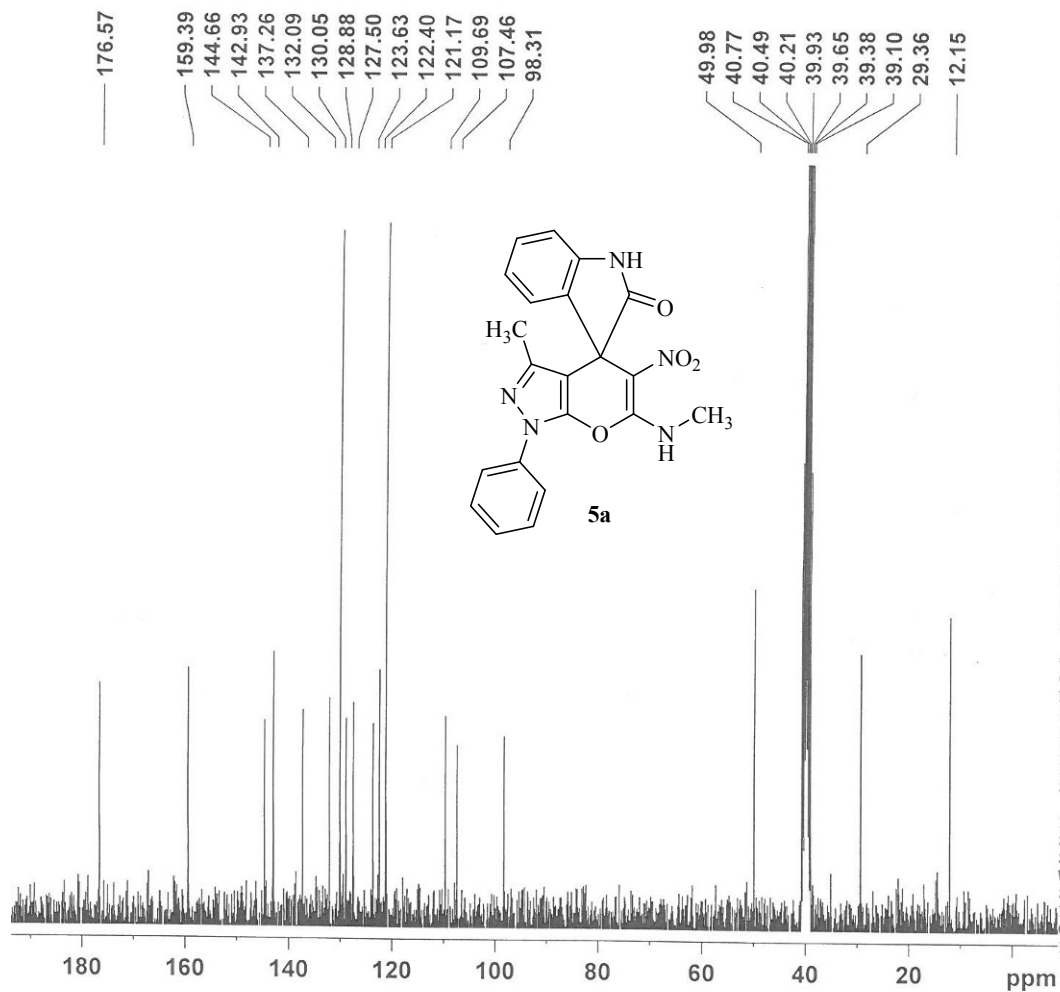

<sup>13</sup>C NMR of 5a

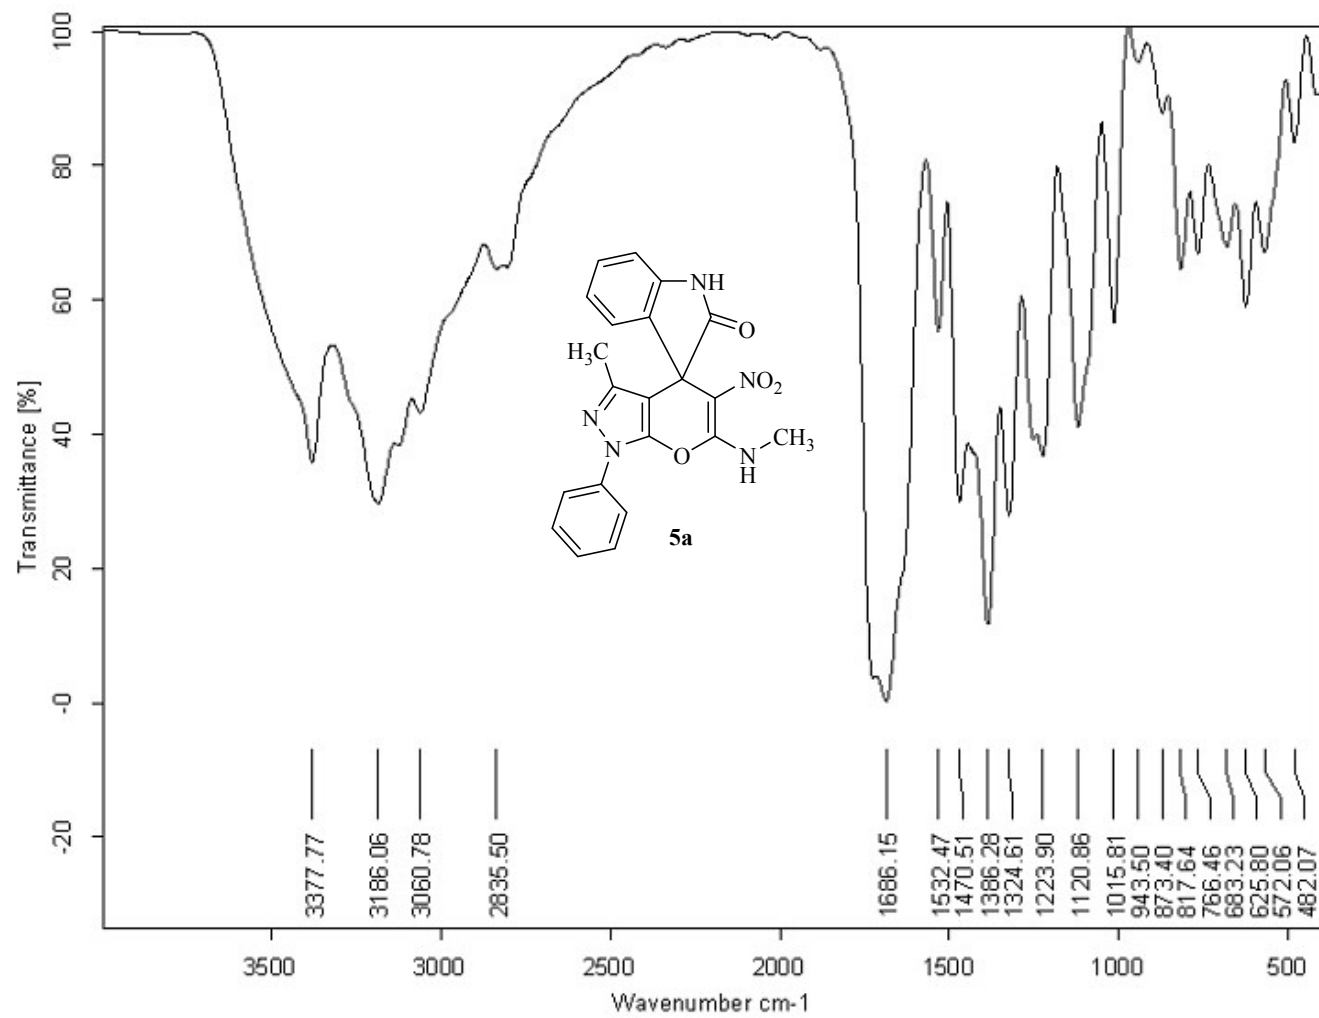

**IR of 5a**

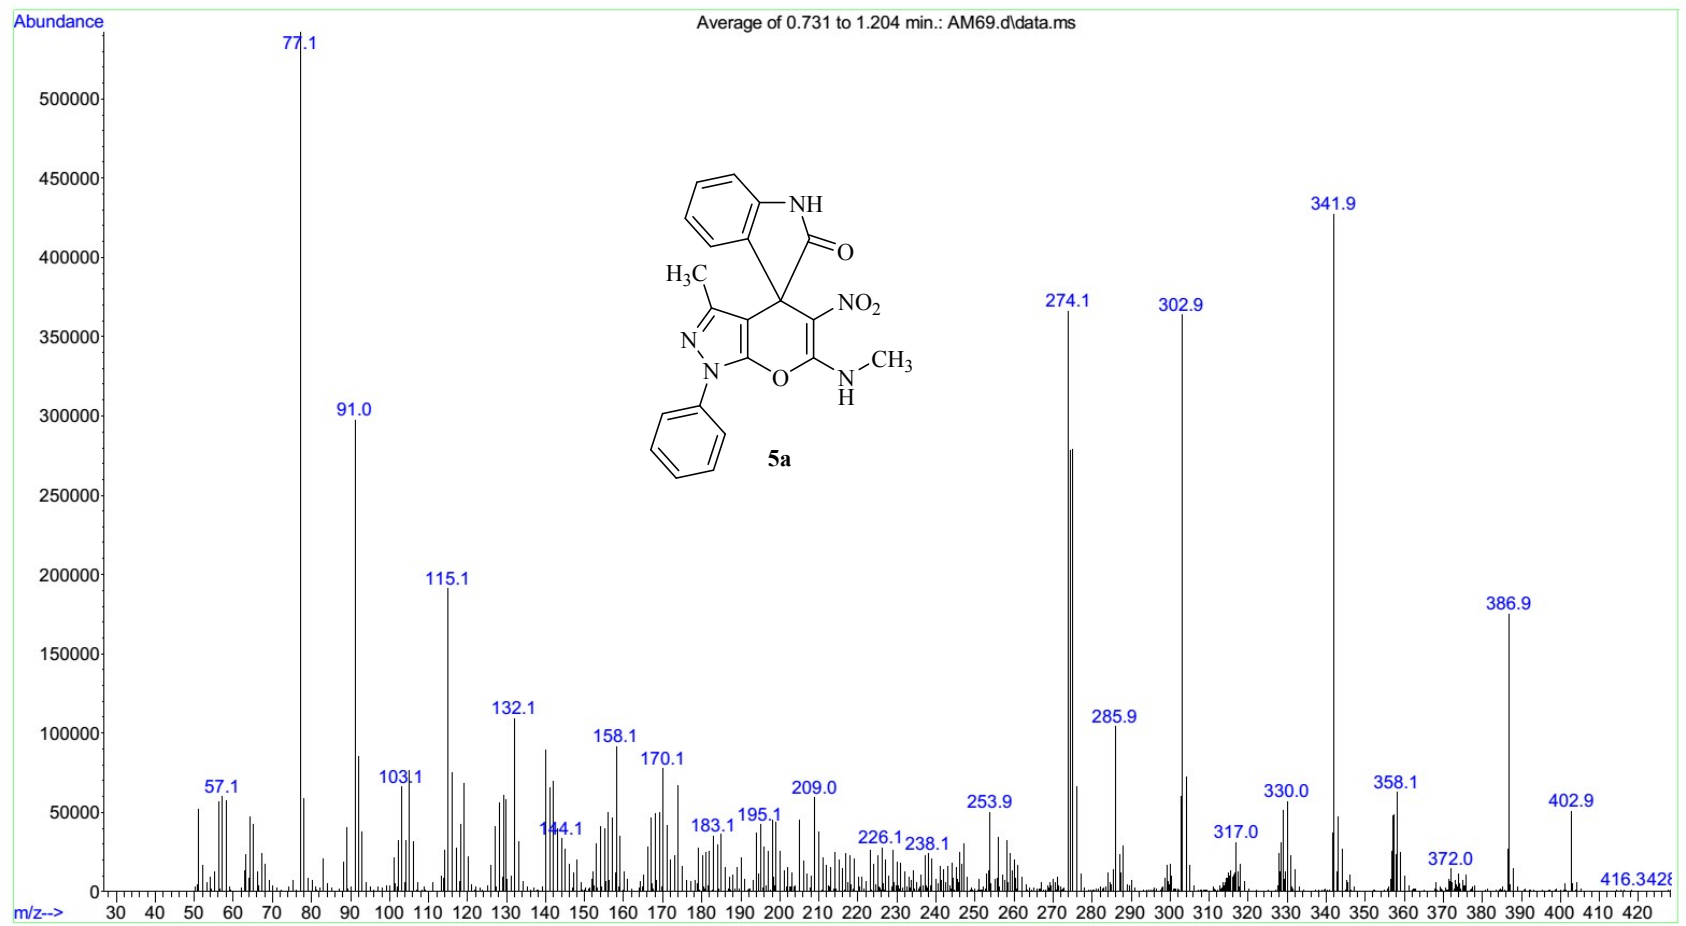

Mass of 5a

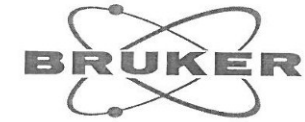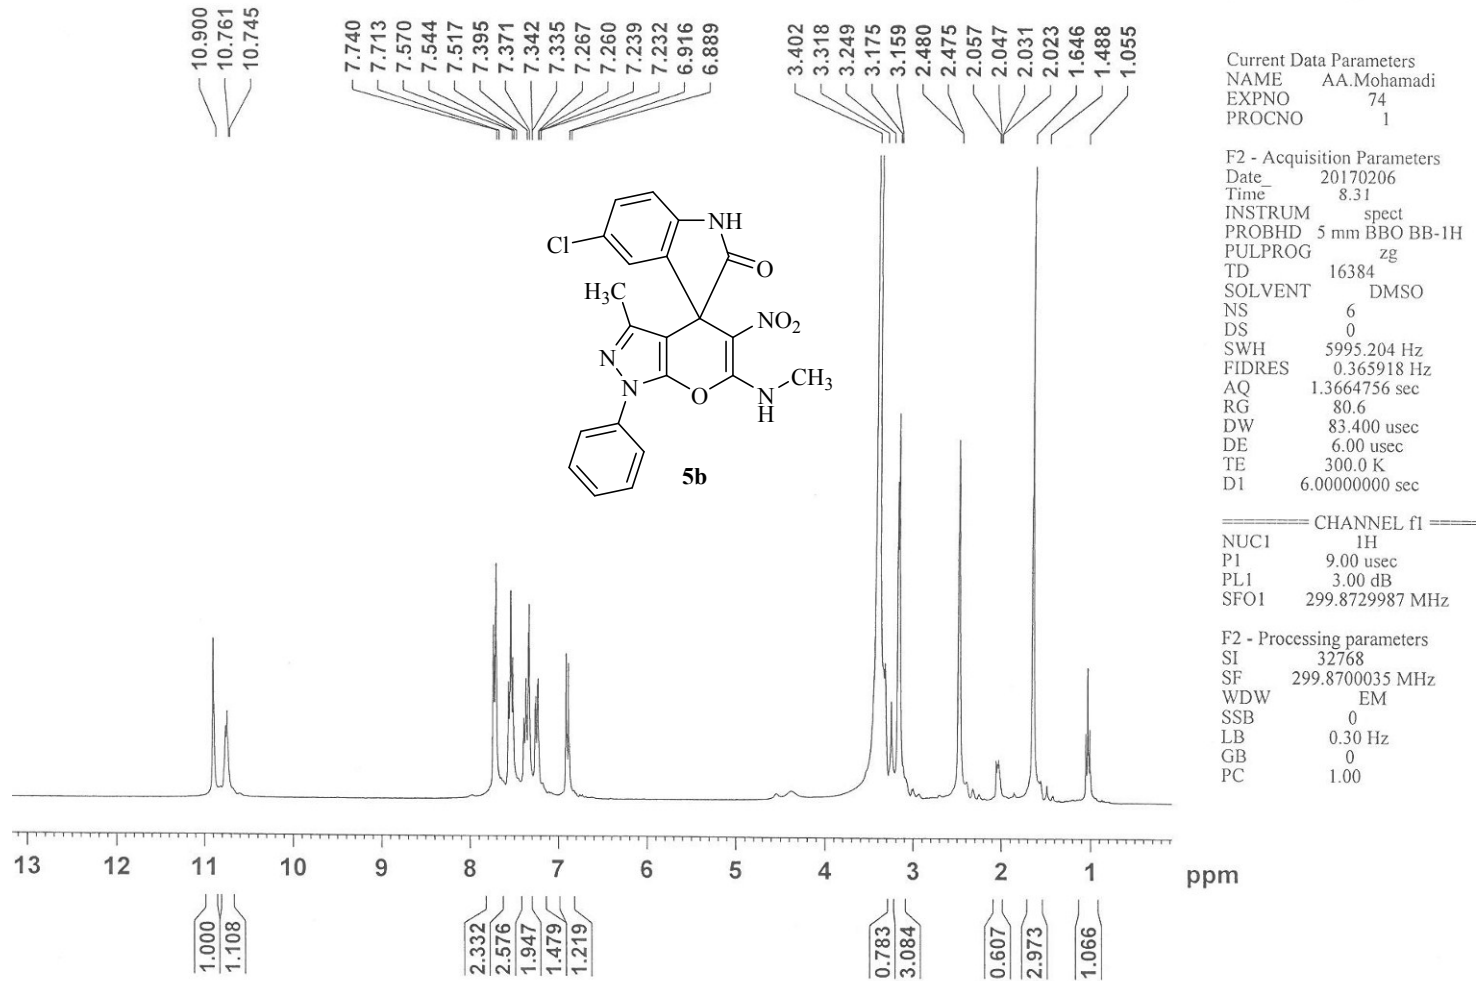

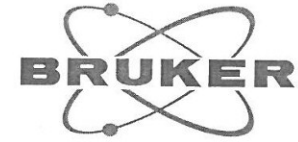

Current Data Parameters  
NAME AA.Mohamadi  
EXPNO 63  
PROCNO 1

F2 - Acquisition Parameters  
Date\_ 20170202  
Time\_ 9.58  
INSTRUM spect  
PROBHD 5 mm BBO BB-1H  
PULPROG zgpg  
TD 65536  
SOLVENT DMSO  
NS 540  
DS 0  
SWH 17985.611 Hz  
FIDRES 0.274439 Hz  
AQ 1.8219508 sec  
RG 32768  
DW 27.800 usec  
DE 6.00 usec  
TE 300.0 K  
D1 4.00000000 sec  
d11 0.03000000 sec  
d12 0.00002000 sec

==== CHANNEL f1 =====  
NUC1 13C  
P1 14.00 usec  
PL1 -6.00 dB  
SFO1 75.4099117 MHz

==== CHANNEL f2 =====  
CPDPRG2 waltz16  
NUC2 1H  
PCPD2 80.00 usec  
PL2 3.00 dB  
PL12 23.00 dB  
PL13 23.00 dB  
SFO2 299.8711995 MHz

F2 - Processing parameters  
SI 32768  
SF 75.4023710 MHz  
WDW EM  
SSB 0  
LB 1.00 Hz  
GB 0  
PC 1.40

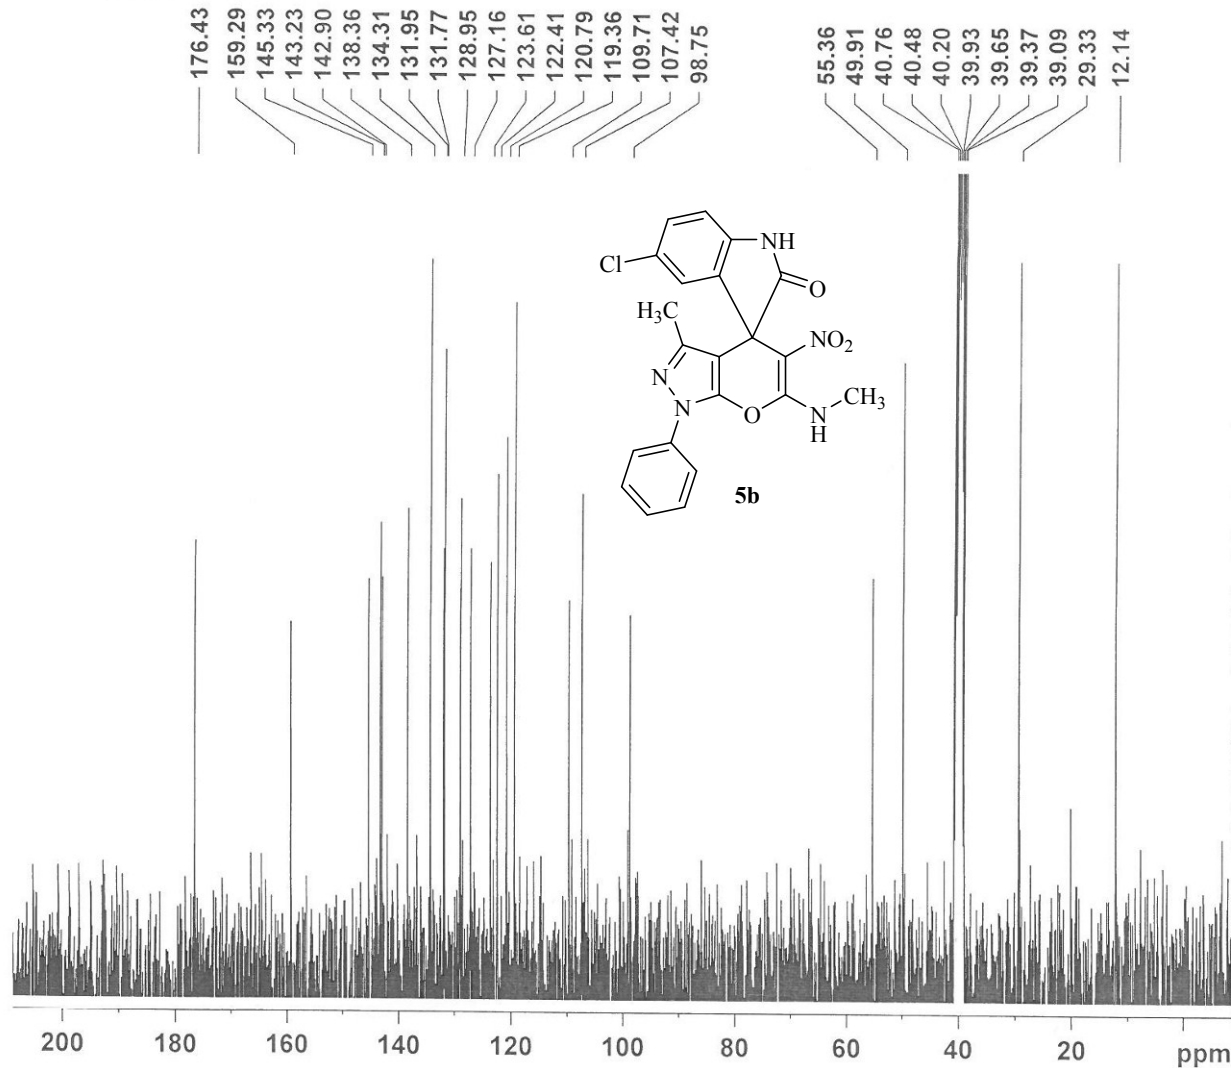

<sup>13</sup>C NMR of 5b



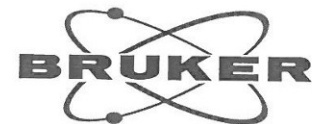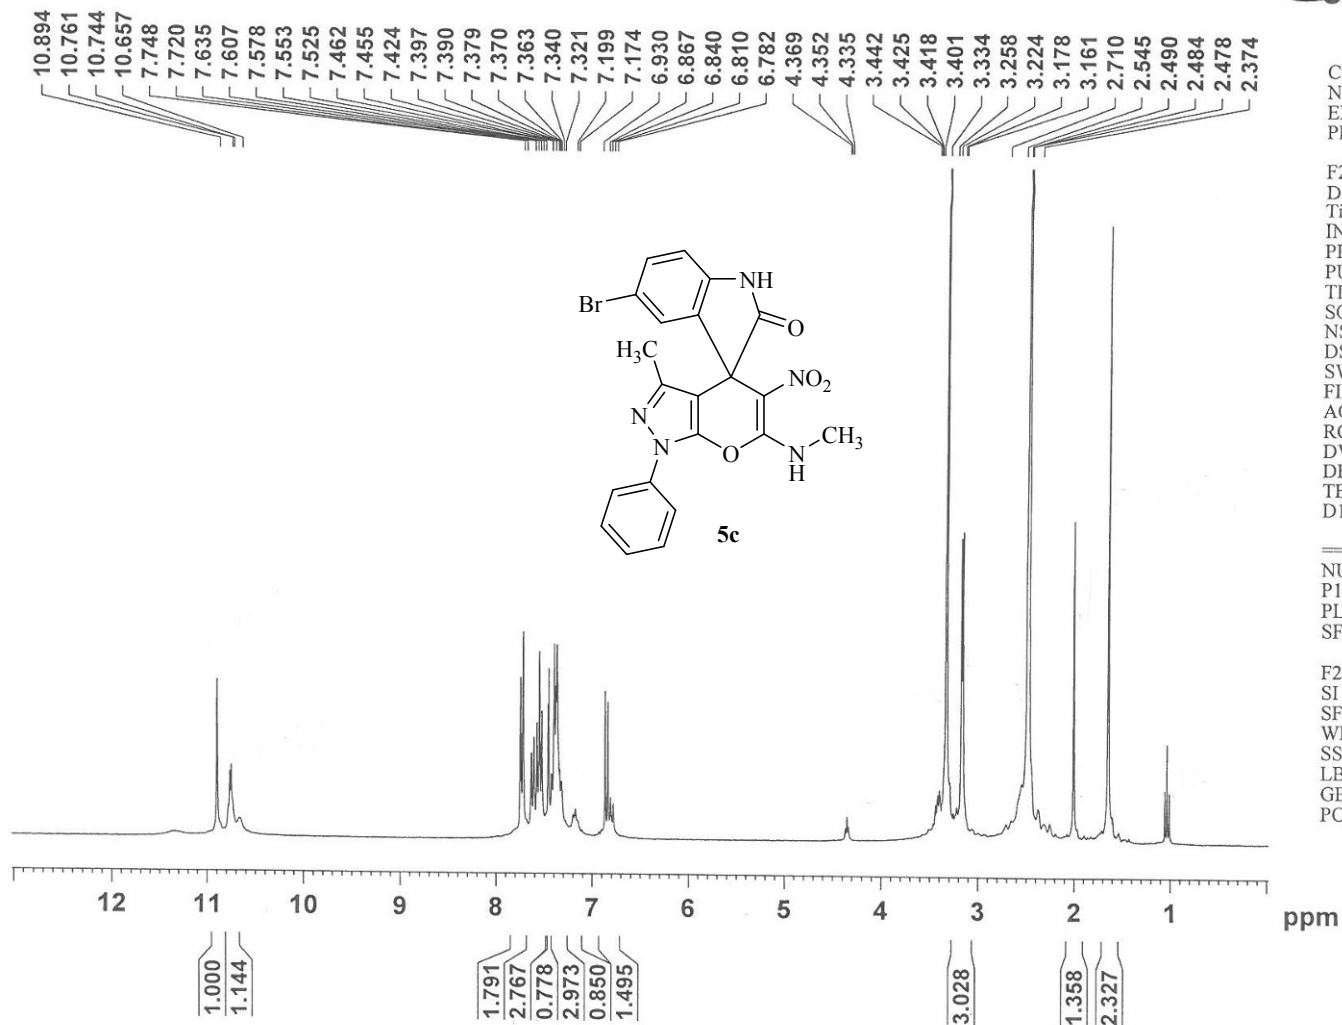

Current Data Parameters  
NAME Kuchi  
EXPNO 10  
PROCNO 1

F2 - Acquisition Parameters  
Date 20161212  
Time 8.17  
INSTRUM spect  
PROBHD 5 mm BBO BB-1H  
PULPROG zg  
TD 16384  
SOLVENT DMSO  
NS 6  
DS 0  
SWH 6172.839 Hz  
FIDRES 0.376760 Hz  
AQ 1.3271540 sec  
RG 181  
DW 81.000 usec  
DE 6.00 usec  
TE 300.0 K  
D1 6.00000000 sec

CHANNEL f1  
NUC1 1H  
P1 9.00 usec  
PL1 3.00 dB  
SFO1 299.8729987 MHz

F2 - Processing parameters  
SI 32768  
SF 299.8700023 MHz  
WDW EM  
SSB 0  
LB 0.30 Hz  
GB 0  
PC 1.00

<sup>1</sup>H NMR of 5c

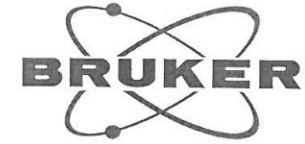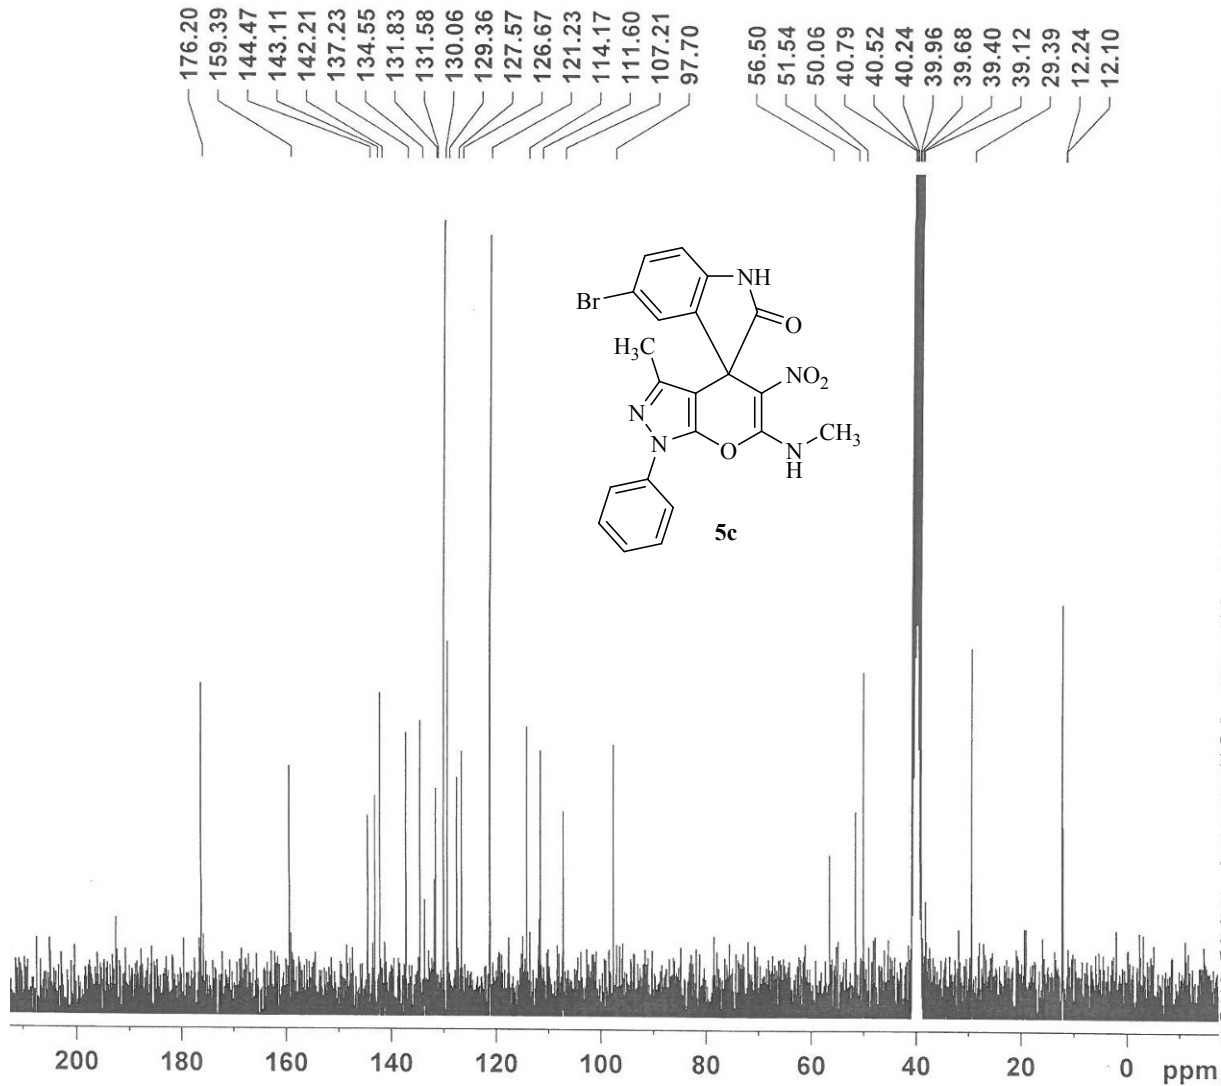

Current Data Parameters  
NAME AA.Mohamadi  
EXPNO 75  
PROCNO 1

F2 - Acquisition Parameters  
Date\_ 20170213  
Time 13.51  
INSTRUM spect  
PROBHD 5 mm BBO BB-1H  
PULPROG zgpg  
TD 65536  
SOLVENT DMSO  
NS 2000  
DS 0  
SWH 17985.611 Hz  
FIDRES 0.274439 Hz  
AQ 1.8219508 sec  
RG 32768  
DW 27.800 usec  
DE 6.00 usec  
TE 300.0 K  
D1 4.00000000 sec  
d11 0.03000000 sec  
d12 0.00002000 sec

==== CHANNEL f1 =====  
NUC1 13C  
P1 14.00 usec  
PL1 -6.00 dB  
SFO1 75.4099117 MHz

==== CHANNEL f2 =====  
CPDPRG2 waltz16  
NUC2 1H  
PCPD2 80.00 usec  
PL2 3.00 dB  
PL12 23.00 dB  
PL13 23.00 dB  
SFO2 299.8711995 MHz

F2 - Processing parameters  
SI 32768  
SF 75.4023710 MHz  
WDW EM  
SSB 0  
LB 1.00 Hz  
GB 0  
PC 1.40

<sup>13</sup>C NMR of 5c

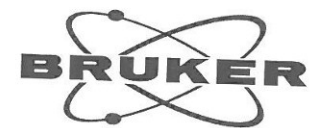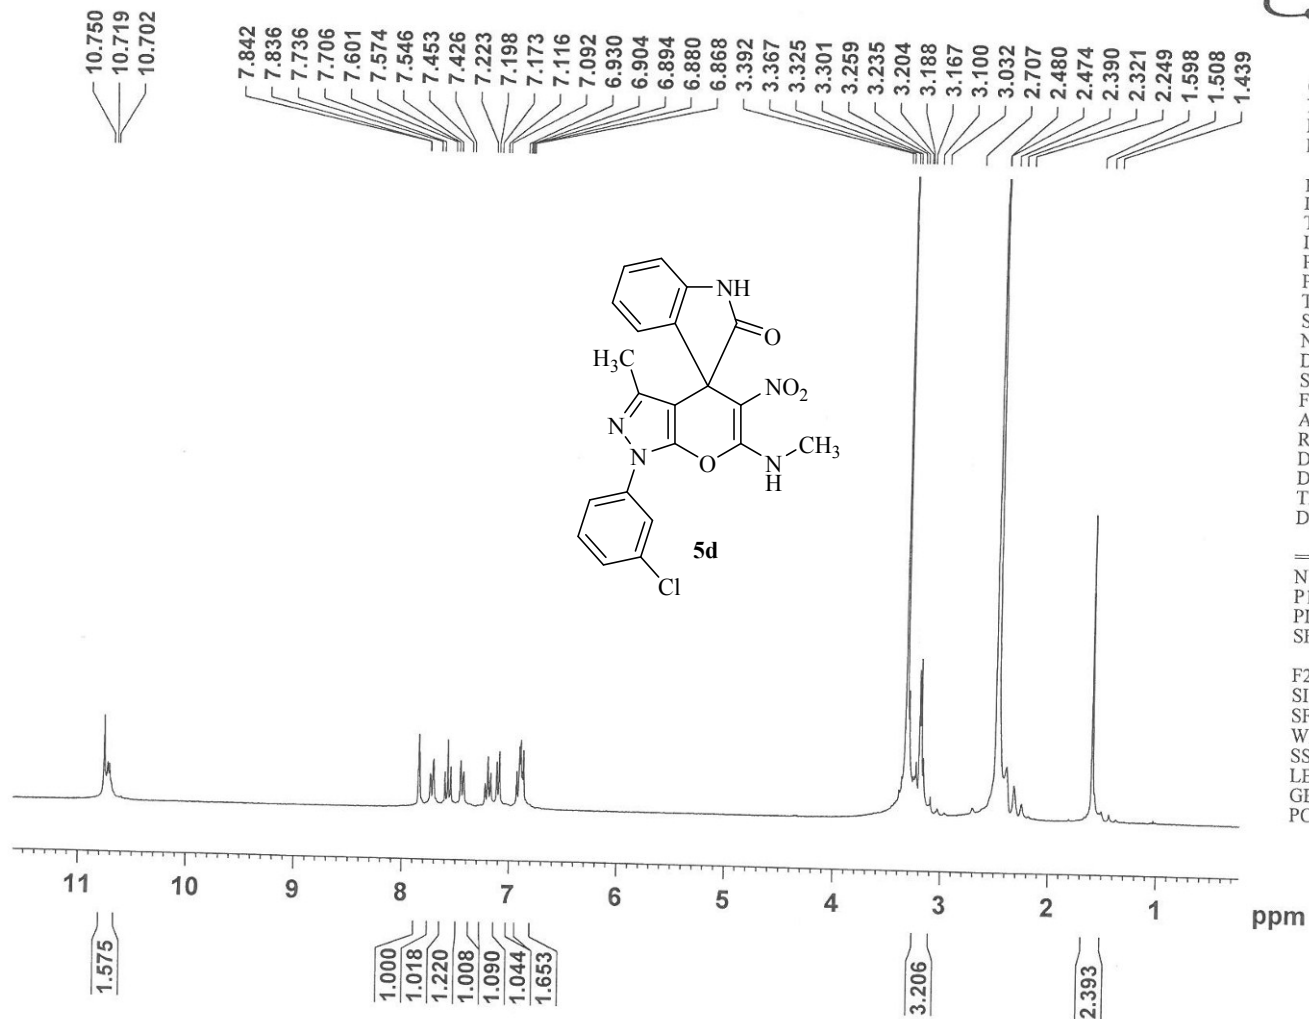

Current Data Parameters  
NAME AA.Mohamadi  
EXPNO 21  
PROCNO 1

F2 - Acquisition Parameters  
Date\_ 20161201  
Time 8.12  
INSTRUM spect  
PROBHD 5 mm BBO BB-1H  
PULPROG zg  
TD 16384  
SOLVENT DMSO  
NS 6  
DS 0  
SWH 5995.204 Hz  
FIDRES 0.365918 Hz  
AQ 1.3664756 sec  
RG 362  
DW 83.400 usec  
DE 6.00 usec  
TE 300.0 K  
D1 6.00000000 sec

CHANNEL f1  
NUC1 1H  
P1 9.00 usec  
PL1 3.00 dB  
SFO1 299.8729987 MHz

F2 - Processing parameters  
SI 32768  
SF 299.8700035 MHz  
WDW EM  
SSB 0  
LB 0.30 Hz  
GB 0  
PC 1.00

<sup>1</sup>H NMR of 5d

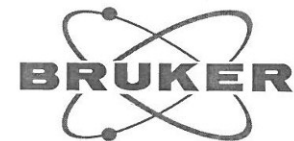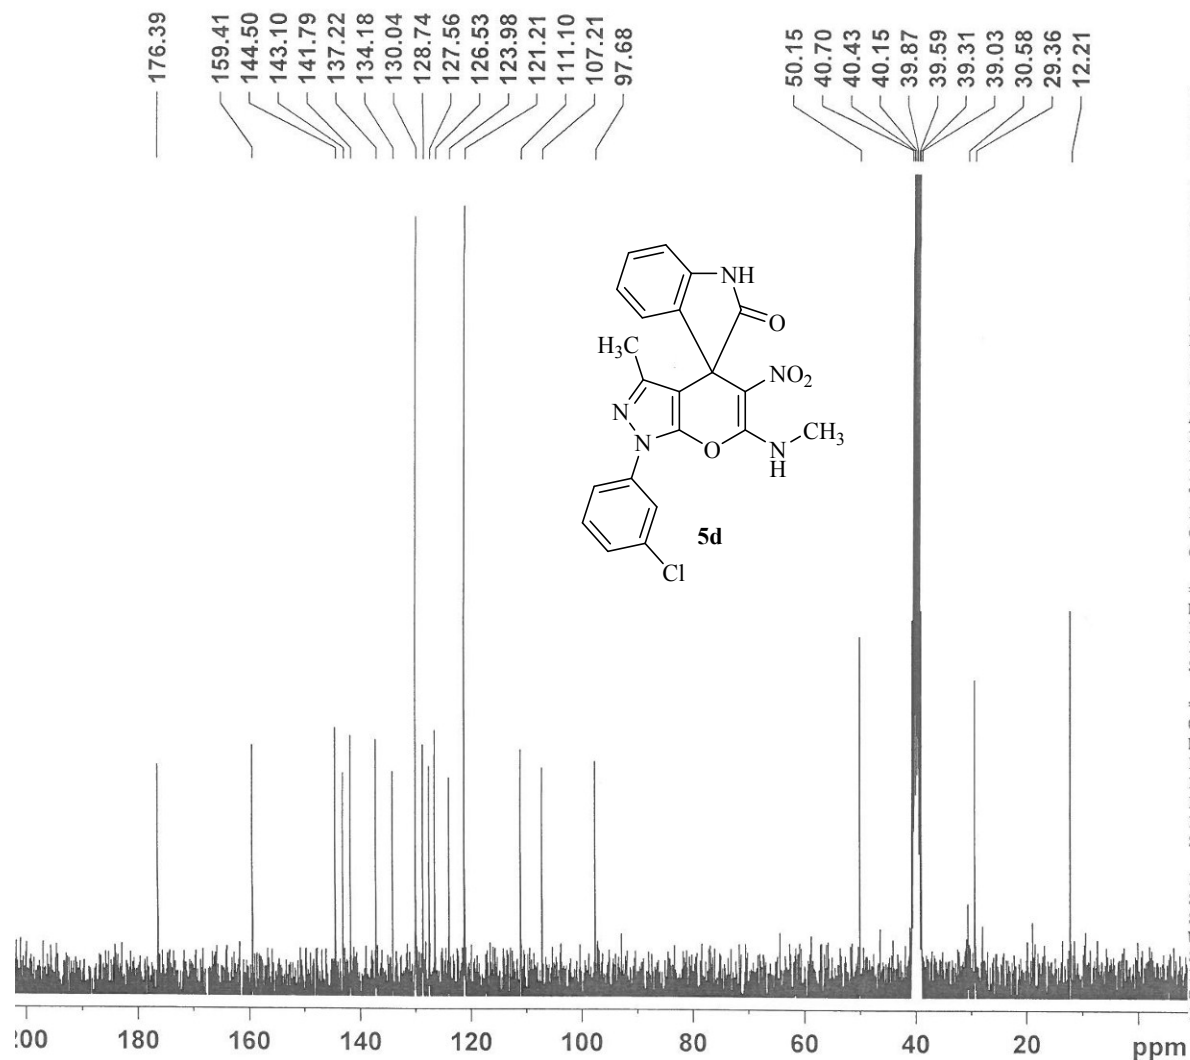

Current Data Parameters  
NAME AA.Mohamadi  
EXPNO 64  
PROCNO 1

F2 - Acquisition Parameters  
Date\_ 20170202  
Time\_ 10.49  
INSTRUM spect  
PROBHD 5 mm BBO BB-1H  
PULPROG zgpg  
TD 65536  
SOLVENT DMSO  
NS 500  
DS 0  
SWH 17985.611 Hz  
FIDRES 0.274439 Hz  
AQ 1.8219508 sec  
RG 32768  
DW 27.800 usec  
DE 6.00 usec  
TE 300.0 K  
D1 4.00000000 sec  
d11 0.03000000 sec  
d12 0.00002000 sec

==== CHANNEL f1 =====  
NUC1 13C  
P1 14.00 usec  
PL1 -6.00 dB  
SFO1 75.4099117 MHz

==== CHANNEL f2 =====  
CPDPRG2 waltz16  
NUC2 1H  
PCPD2 80.00 usec  
PL2 3.00 dB  
PL12 23.00 dB  
PL13 23.00 dB  
SFO2 299.8711995 MHz

F2 - Processing parameters  
SI 32768  
SF 75.4023710 MHz  
WDW EM  
SSB 0  
LB 1.00 Hz  
GB 0  
PC 1.40

<sup>13</sup>C NMR of 5d

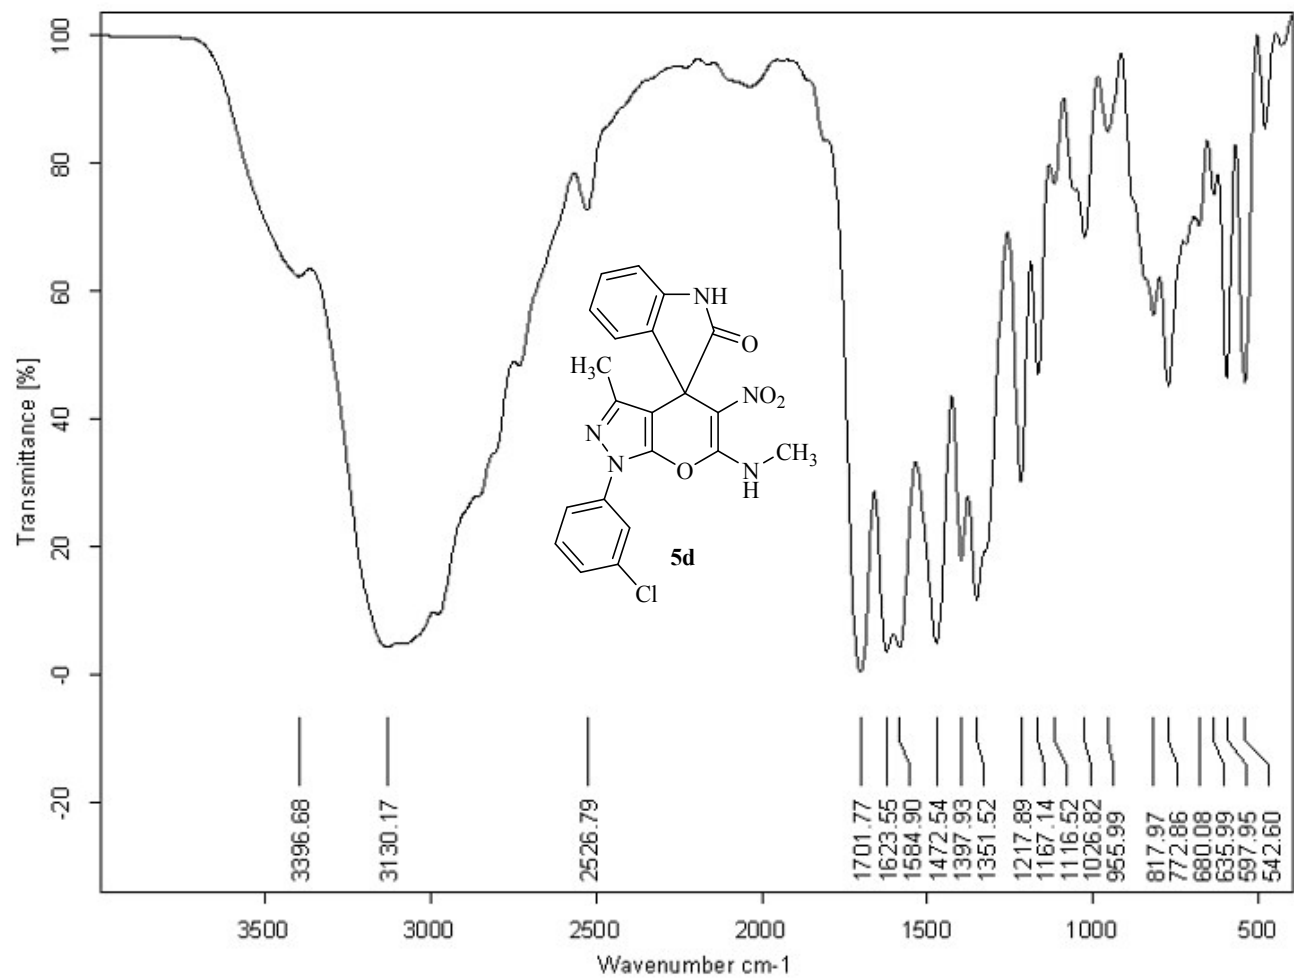

IR of 5d

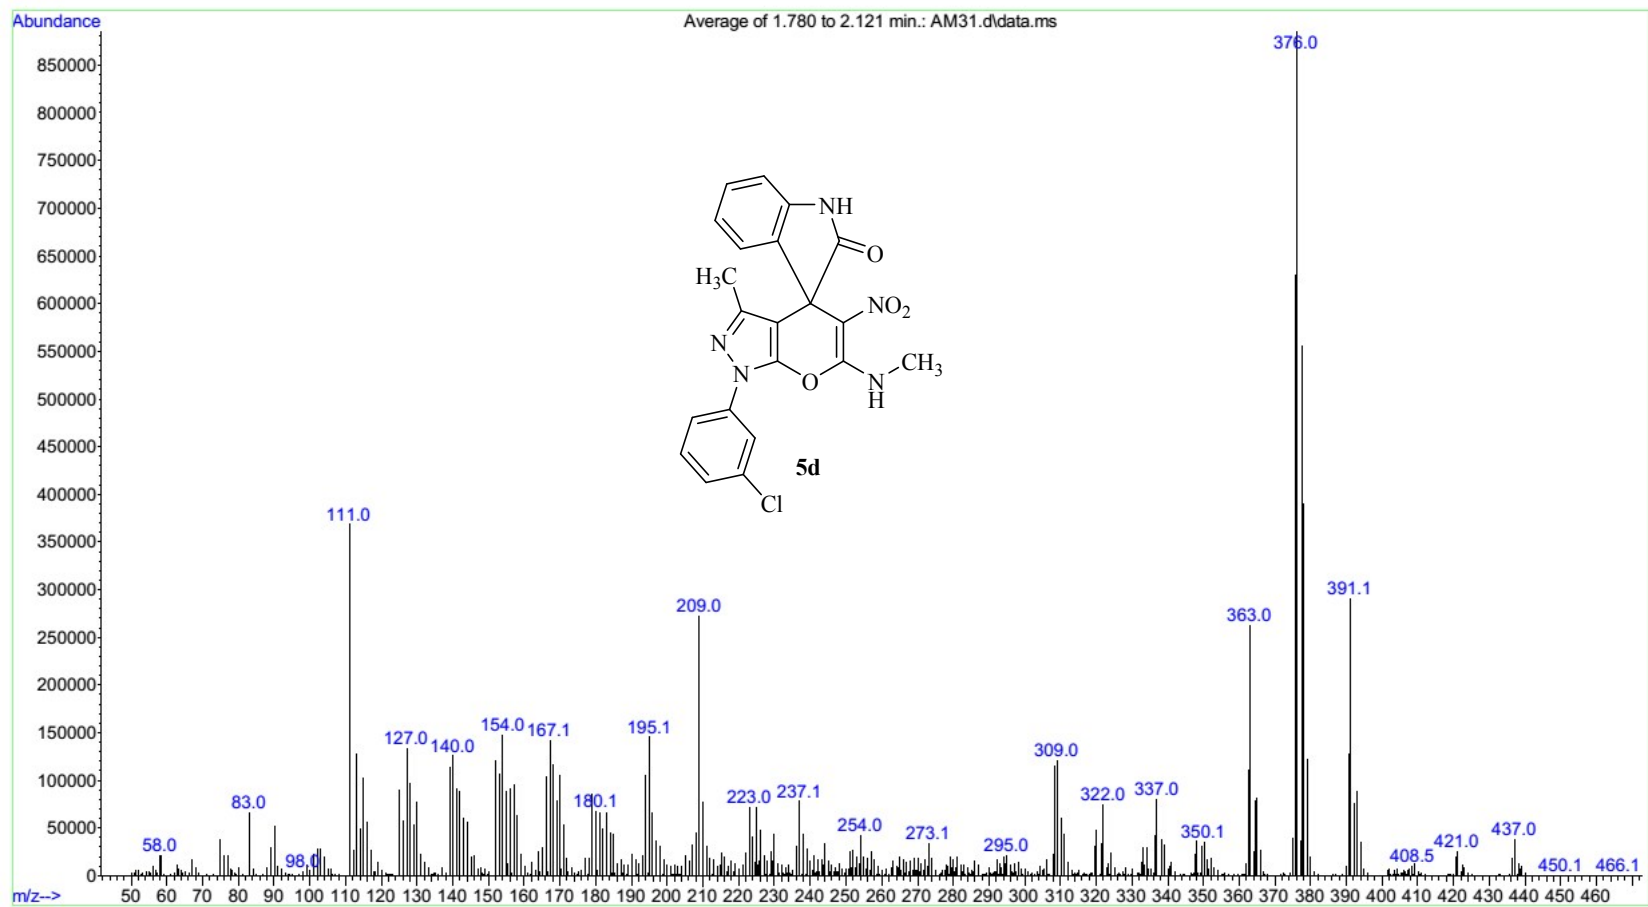

Mass of 5d

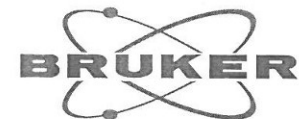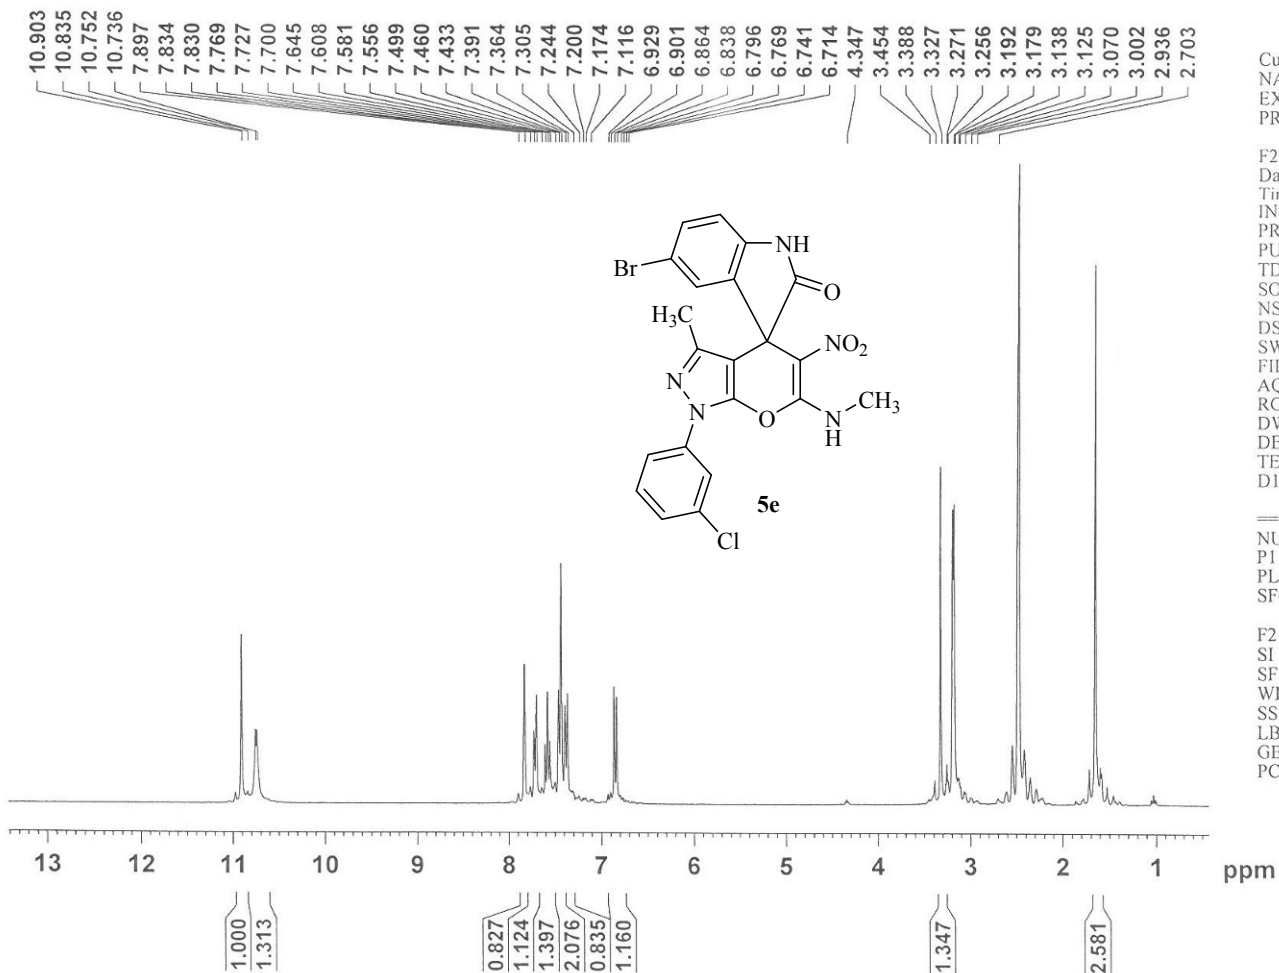

Current Data Parameters  
NAME AA.Mohamadi  
EXPNO 51  
PROCNO 1

F2 - Acquisition Parameters  
Date\_ 20170120  
Time 12.22  
INSTRUM spect  
PROBHD 5 mm BBO BB-1H  
PULPROG zg  
TD 16384  
SOLVENT DMSO  
NS 6  
DS 0  
SWH 5995.204 Hz  
FIDRES 0.365918 Hz  
AQ 1.3664756 sec  
RG 256  
DW 83.400 usec  
DE 6.00 usec  
TE 300.0 K  
D1 6.00000000 sec

===== CHANNEL f1 =====  
NUC1 1H  
P1 9.00 usec  
PL1 3.00 dB  
SFO1 299.8729987 MHz

F2 - Processing parameters  
SI 32768  
SF 299.8700035 MHz  
WDW EM  
SSB 0  
LB 0.30 Hz  
GB 0  
PC 1.00

<sup>1</sup>H NMR of 5e

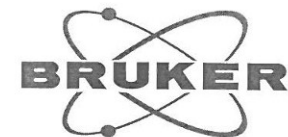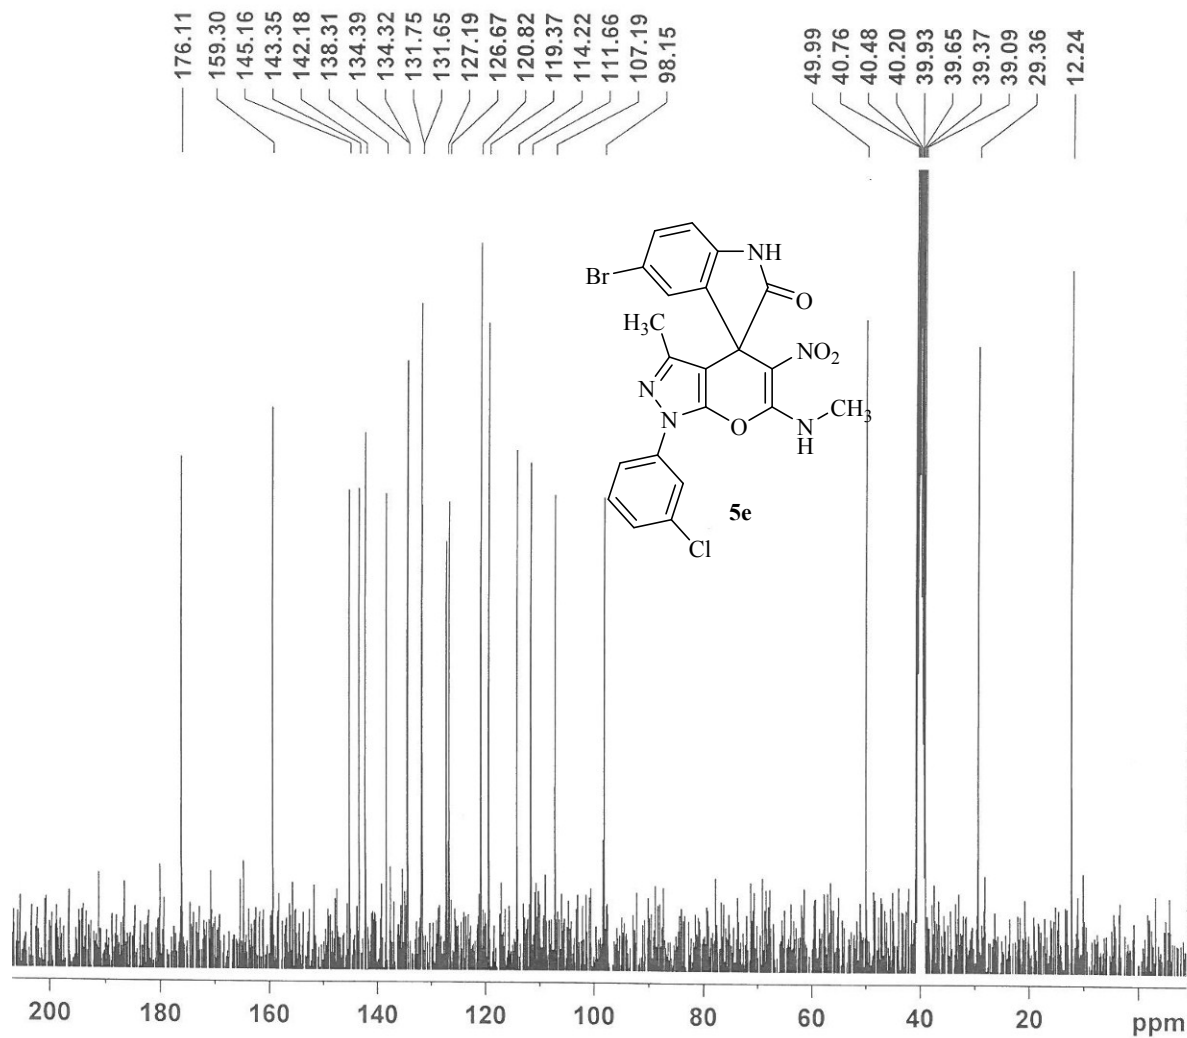

Current Data Parameters  
NAME AA.Mohamadi  
EXPNO 65  
PROCNO 1

F2 - Acquisition Parameters  
Date\_ 20170202  
Time\_ 11.44  
INSTRUM spect  
PROBHD 5 mm BBO BB-1H  
PULPROG zgpg  
TD 65536  
SOLVENT DMSO  
NS 504  
DS 0  
SWH 17985.611 Hz  
FIDRES 0.274439 Hz  
AQ 1.8219508 sec  
RG 32768  
DW 27.800 usec  
DE 6.00 usec  
TE 300.0 K  
D1 4.00000000 sec  
d11 0.03000000 sec  
d12 0.00002000 sec

==== CHANNEL f1 =====  
NUC1 13c  
P1 14.00 usec  
PL1 -6.00 dB  
SFO1 75.4099117 MHz

==== CHANNEL f2 =====  
CPDPRG2 waltz16  
NUC2 1H  
PCPD2 80.00 usec  
PL2 3.00 dB  
PL12 23.00 dB  
PL13 23.00 dB  
SFO2 299.8711995 MHz

F2 - Processing parameters  
SI 32768  
SF 75.4023710 MHz  
WDW EM  
SSB 0  
LB 1.00 Hz  
GB 0  
PC 1.40

<sup>13</sup>C NMR of 5e



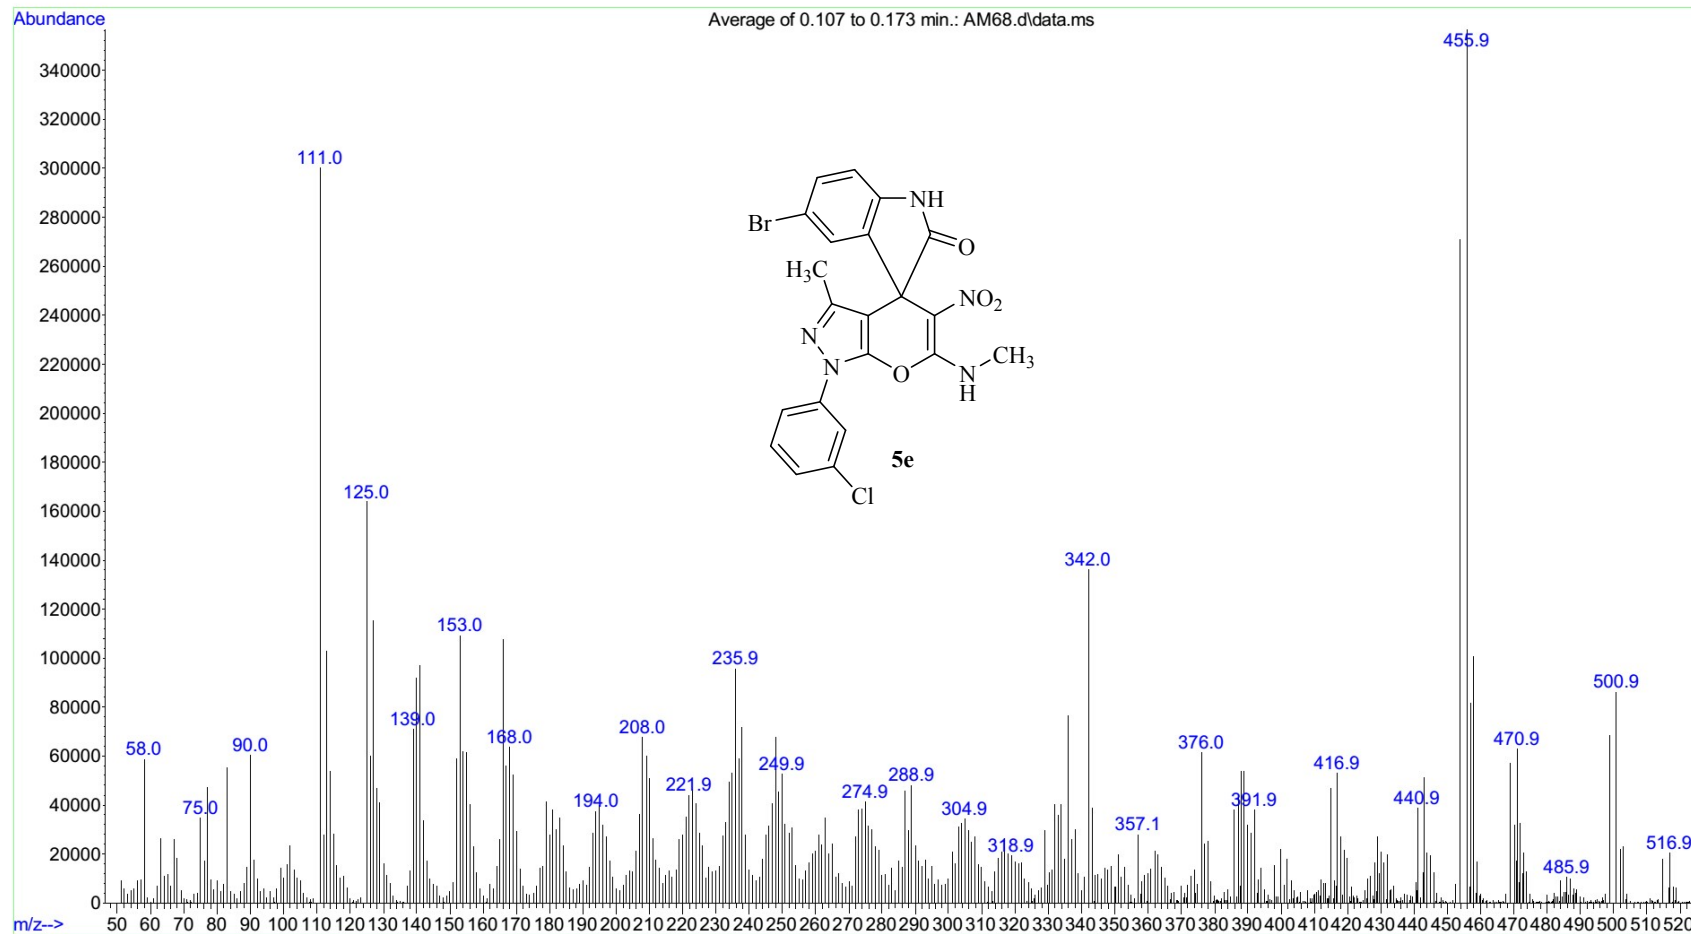

Mass of 5e

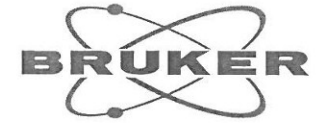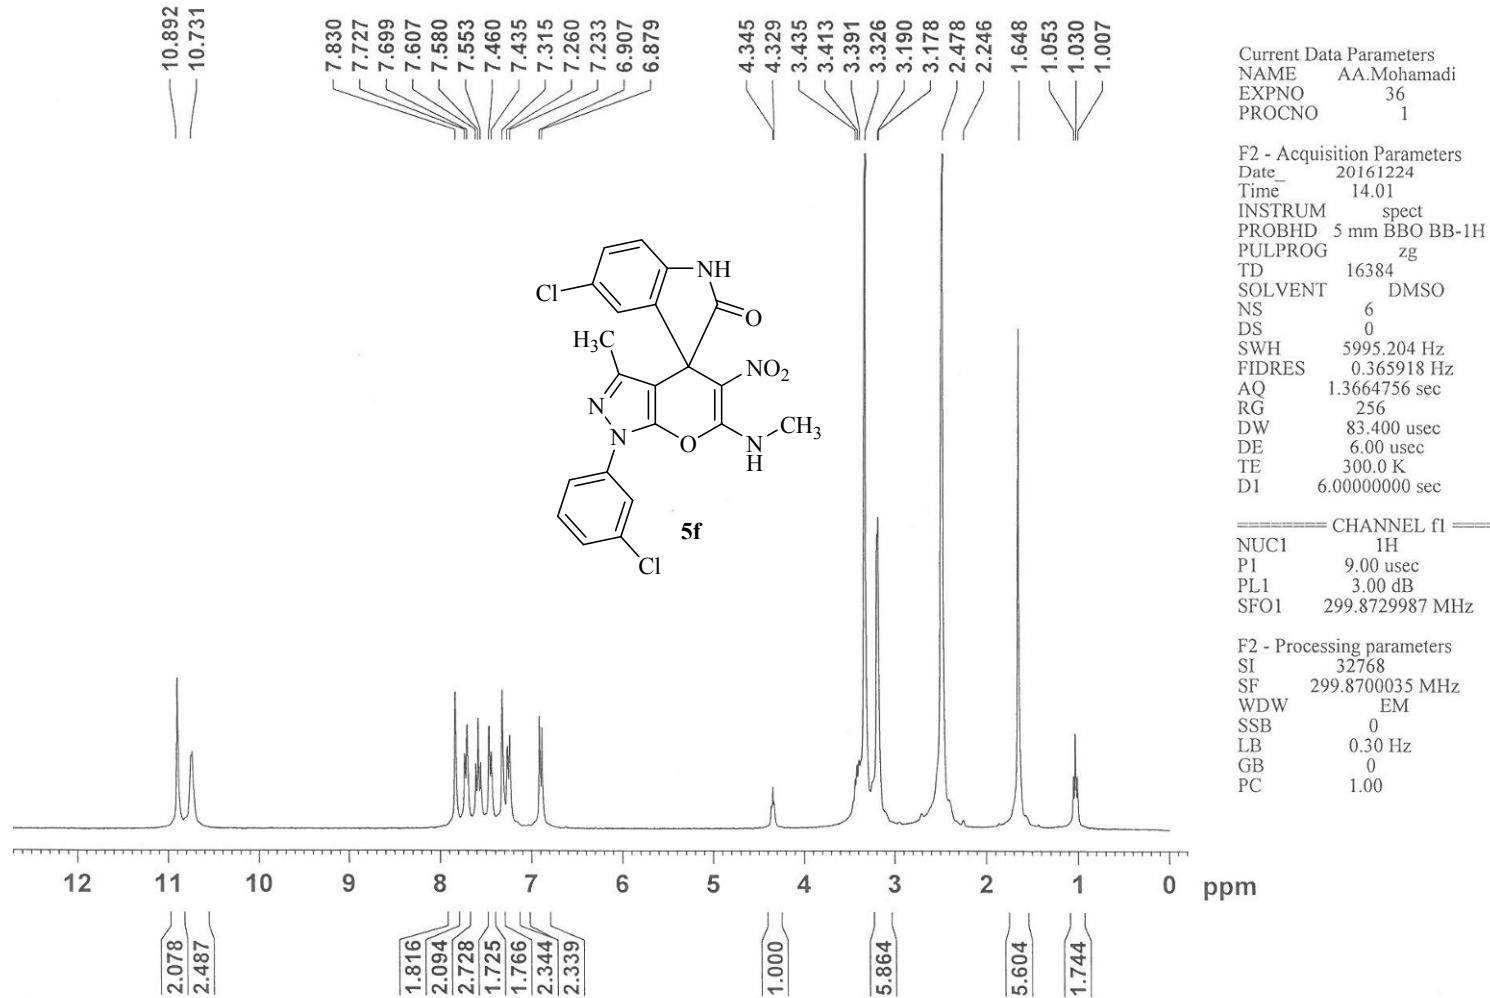

**<sup>1</sup>H NMR of 5f**

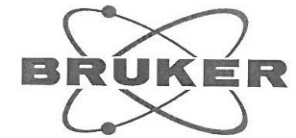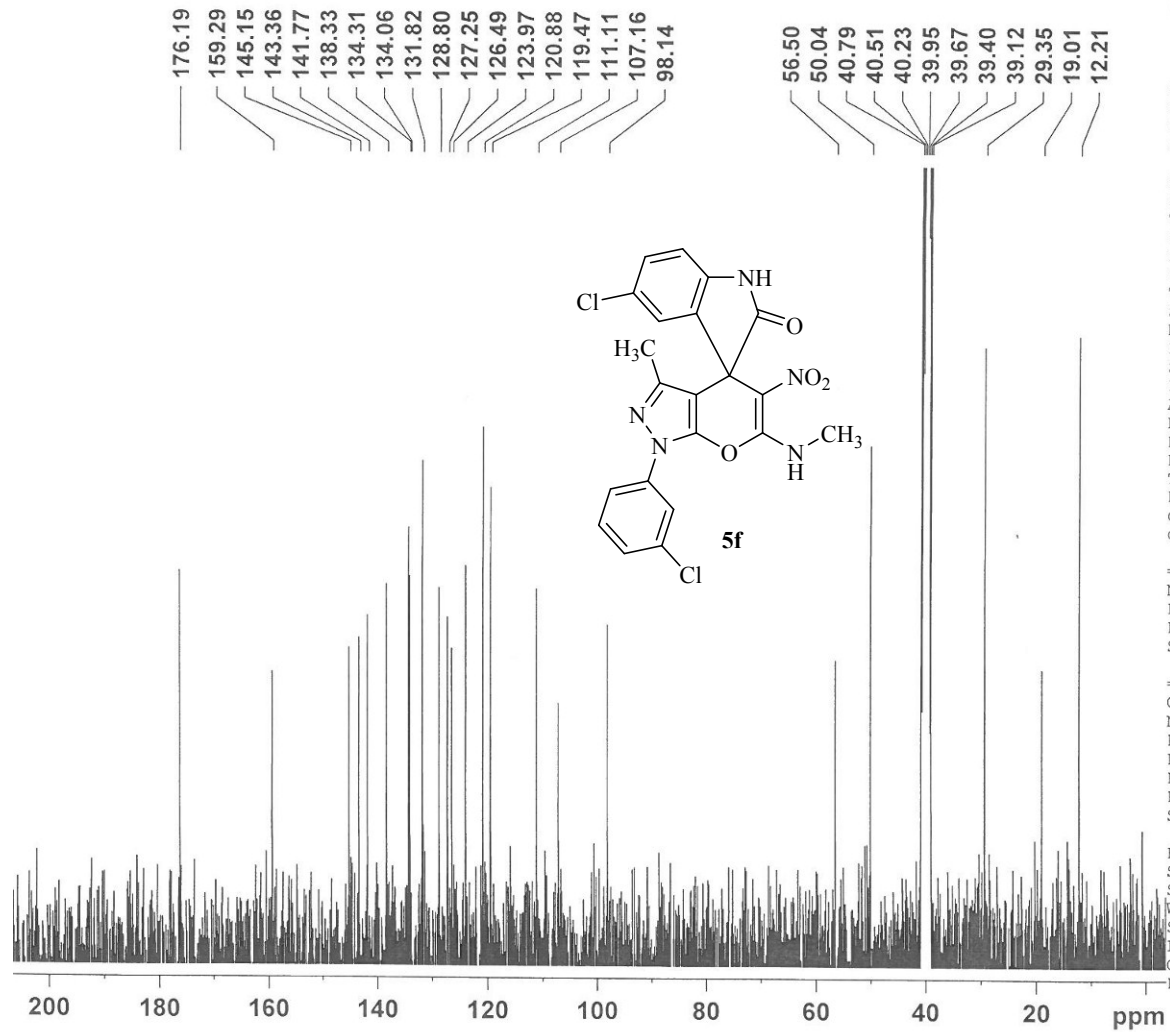

Current Data Parameters  
NAME AA.Mohamadi  
EXPNO 39  
PROCNO 1

F2 - Acquisition Parameters  
Date\_ 20161230  
Time\_ 14.13  
INSTRUM spect  
PROBHD 5 mm BBO BB-1H  
PULPROG zgpg  
TD 65536  
SOLVENT DMSO  
NS 1500  
DS 0  
SWH 17985.611 Hz  
FIDRES 0.274439 Hz  
AQ 1.8219508 sec  
RG 32768  
DW 27.800 usec  
DE 6.00 usec  
TE 300.0 K  
D1 4.00000000 sec  
d11 0.03000000 sec  
d12 0.00002000 sec

==== CHANNEL f1 =====  
NUC1 13C  
P1 14.00 usec  
PL1 -6.00 dB  
SFO1 75.4099117 MHz

==== CHANNEL f2 =====  
CPDPRG2 waltz16  
NUC2 1H  
PCPD2 80.00 usec  
PL2 3.00 dB  
PL12 23.00 dB  
PL13 23.00 dB  
SFO2 299.8711995 MHz

F2 - Processing parameters  
SI 32768  
SF 75.4023710 MHz  
WDW EM  
SSB 0  
LB 1.00 Hz  
GB 0  
PC 1.40

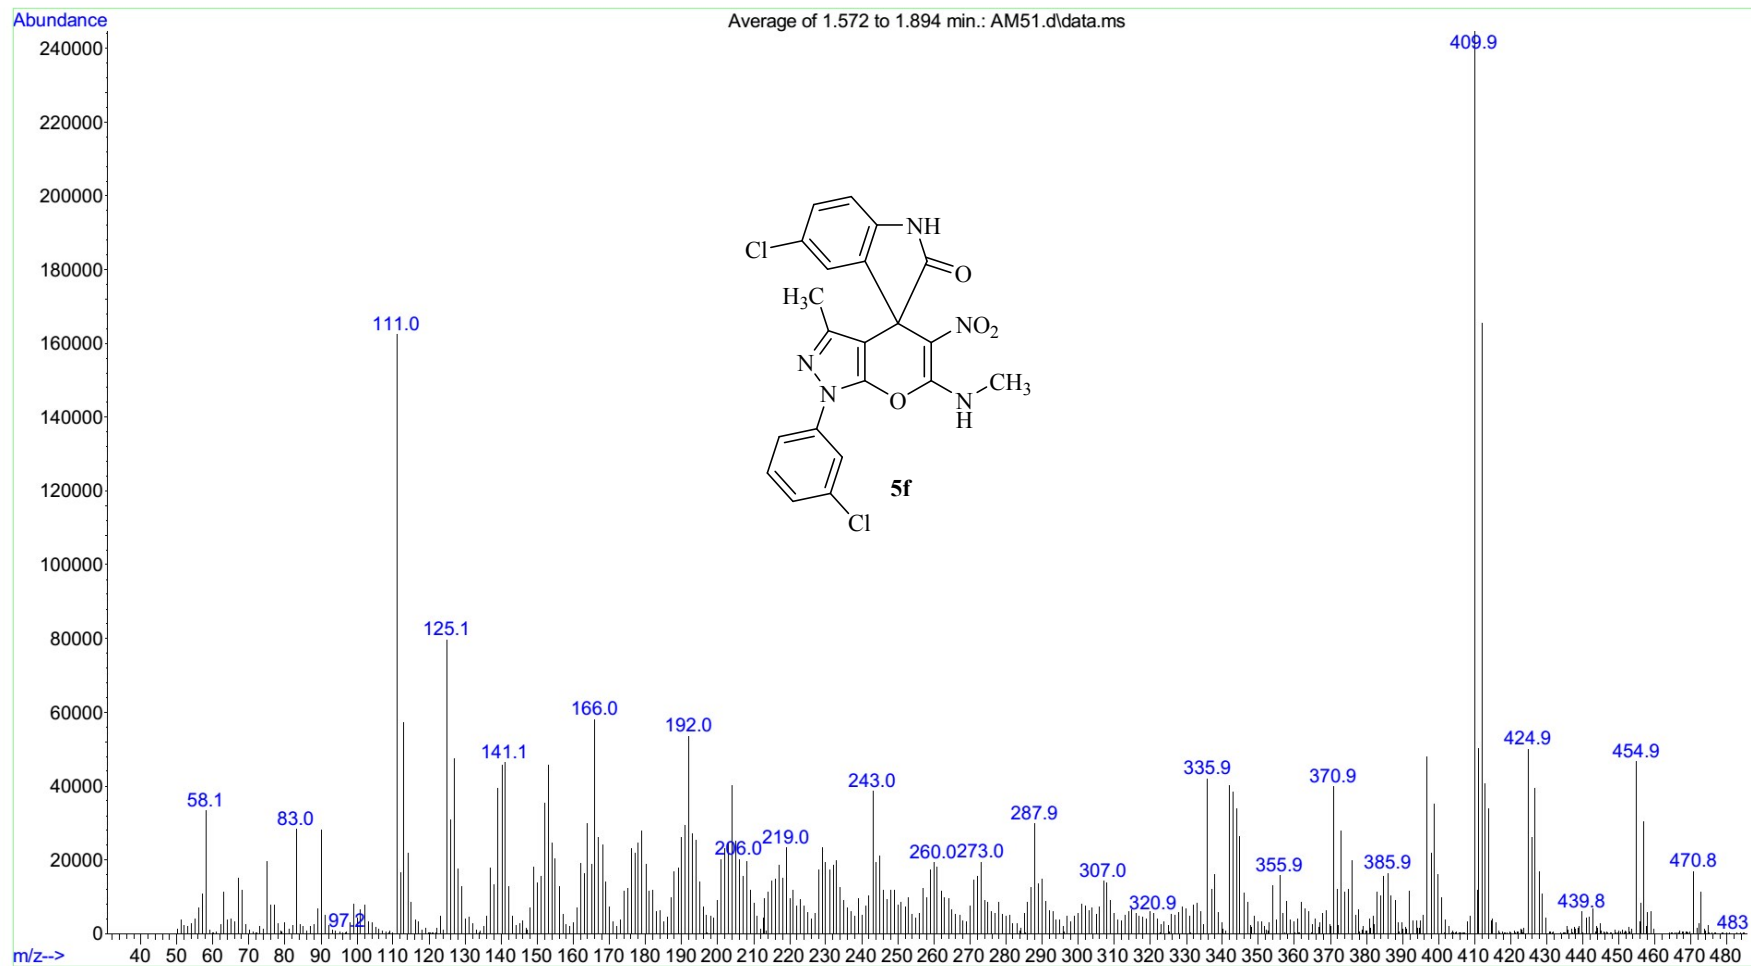

Mass of 5f

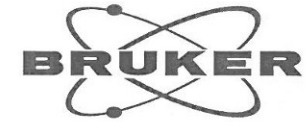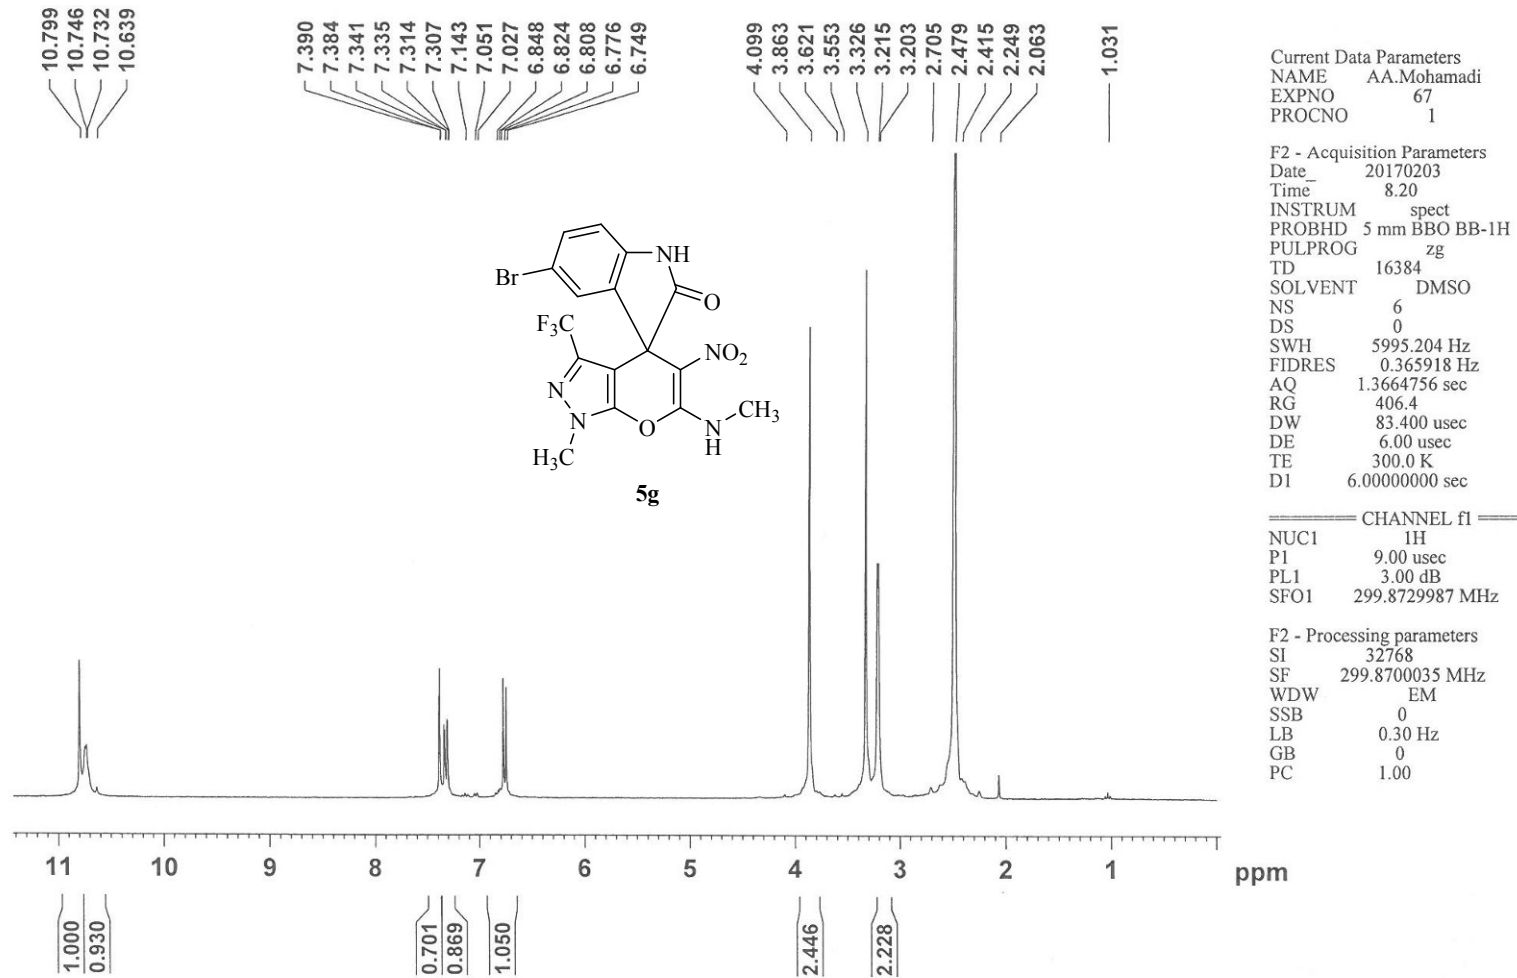

<sup>1</sup>H NMR of 5g

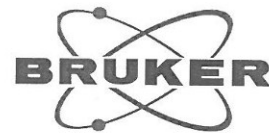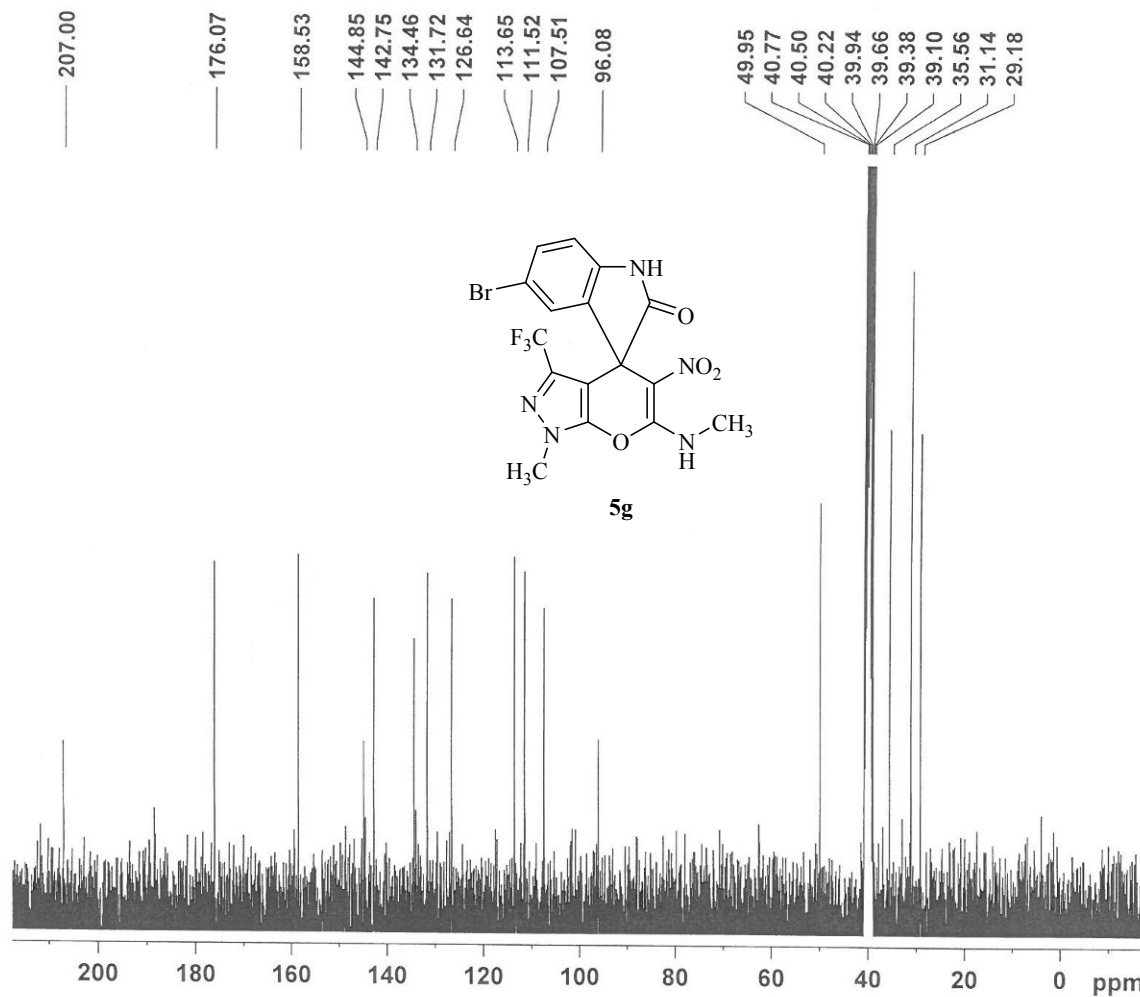

Current Data Parameters  
NAME AA.Mohamadi  
EXPNO 77  
PROCNO 1

F2 - Acquisition Parameters  
Date\_ 20170213  
Time 10.33  
INSTRUM spect  
PROBHD 5 mm BBO BB-1H  
PULPROG zgpg  
TD 65536  
SOLVENT DMSO  
NS 1510  
DS 0  
SWH 17985.611 Hz  
FIDRES 0.274439 Hz  
AQ 1.8219508 sec  
RG 32768  
DW 27.800 usec  
DE 6.00 usec  
TE 300.0 K  
D1 4.00000000 sec  
d11 0.03000000 sec  
d12 0.00002000 sec

==== CHANNEL f1 =====  
NUC1 13C  
P1 14.00 usec  
PL1 -6.00 dB  
SFO1 75.4099117 MHz

==== CHANNEL f2 =====  
CPDPRG2 waltz16  
NUC2 1H  
PCPD2 80.00 usec  
PL2 3.00 dB  
PL12 23.00 dB  
PL13 23.00 dB  
SFO2 299.8711995 MHz

F2 - Processing parameters  
SI 32768  
SF 75.4023710 MHz  
WDW EM  
SSB 0  
LB 1.00 Hz  
GB 0  
PC 1.40

<sup>13</sup>C NMR of 5g

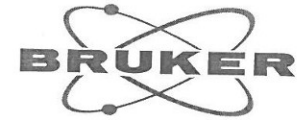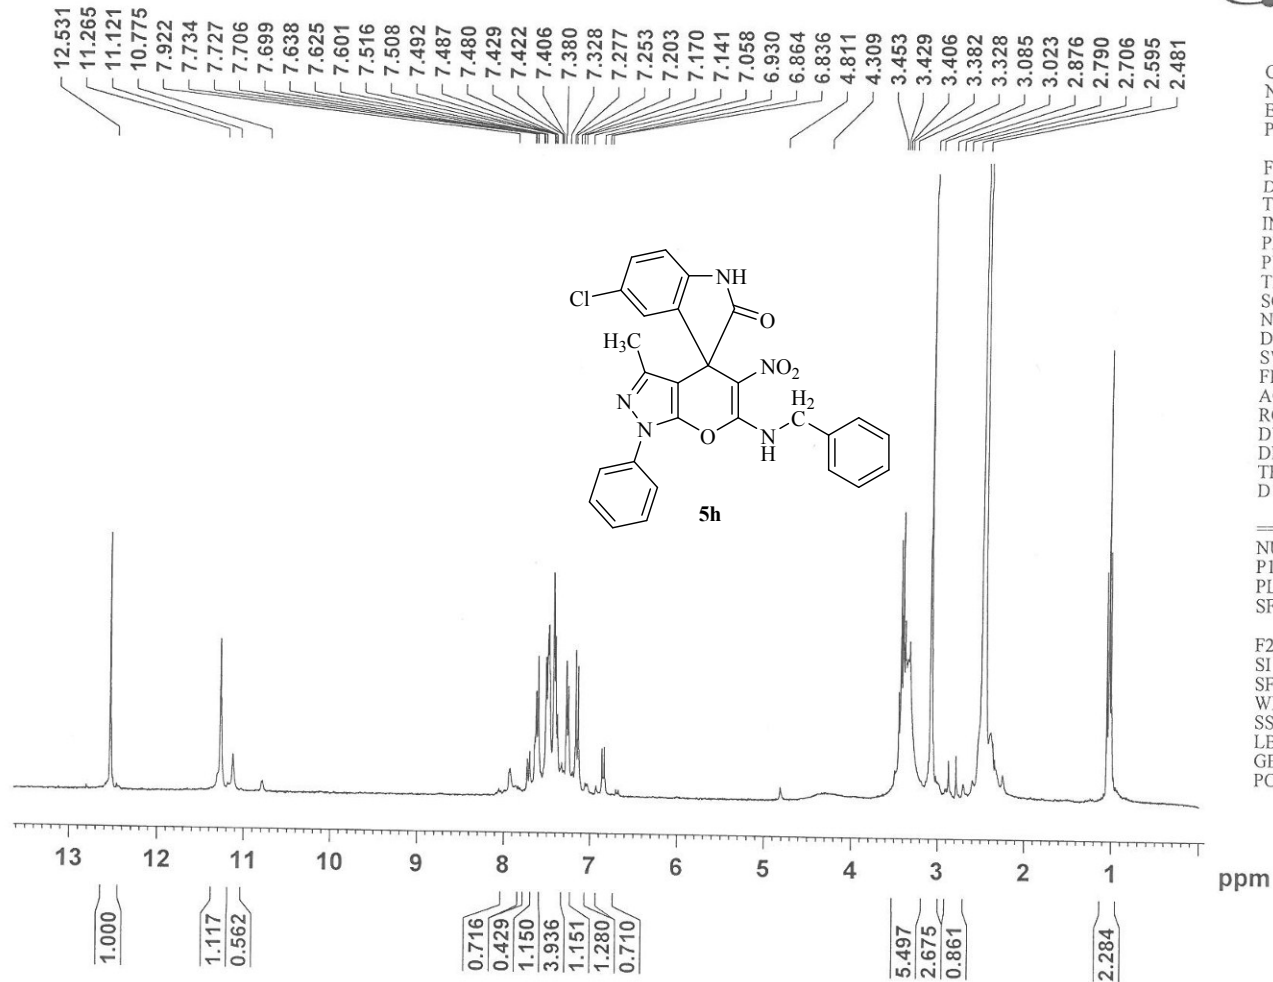

Current Data Parameters  
NAME AA.Mohamadi  
EXPNO 70  
PROCNO 1

F2 - Acquisition Parameters  
Date\_ 20170203  
Time 8.28  
INSTRUM spect  
PROBHD 5 mm BBO BB-1H  
PULPROG zg  
TD 16384  
SOLVENT DMSO  
NS 6  
DS 0  
SWH 5995.204 Hz  
FIDRES 0.365918 Hz  
AQ 1.3664756 sec  
RG 362  
DW 83.400 usec  
DE 6.00 usec  
TE 300.0 K  
D1 6.00000000 sec

CHANNEL f1  
NUC1 1H  
P1 9.00 usec  
PL1 3.00 dB  
SFO1 299.8729987 MHz

F2 - Processing parameters  
SI 32768  
SF 299.8700035 MHz  
WDW EM  
SSB 0  
LB 0.30 Hz  
GB 0  
PC 1.00

**<sup>1</sup>H NMR of 5h**

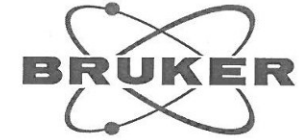

Current Data Parameters  
NAME AA.Mohamadi  
EXPNO 82  
PROCNO 1

F2 - Acquisition Parameters  
Date\_ 20170218  
Time\_ 11.50  
INSTRUM spect  
PROBHD 5 mm BBO BB-1H  
PULPROG zgpg  
TD 65536  
SOLVENT DMSO  
NS 1260  
DS 0  
SWH 17985.611 Hz  
FIDRES 0.274439 Hz  
AQ 1.8219508 sec  
RG 32768  
DW 27.800 usec  
DE 6.00 usec  
TE 300.0 K  
D1 4.00000000 sec  
d11 0.03000000 sec  
d12 0.00002000 sec

===== CHANNEL f1 =====  
NUC1 13C  
P1 14.00 usec  
PL1 -6.00 dB  
SFO1 75.4099117 MHz

===== CHANNEL f2 =====  
CPDPRG2 waltz16  
NUC2 1H  
PCPD2 80.00 usec  
PL2 3.00 dB  
PL12 23.00 dB  
PL13 23.00 dB  
SFO2 299.8711995 MHz

F2 - Processing parameters  
SI 32768  
SF 75.4023710 MHz  
WDW EM  
SSB 0  
LB 1.00 Hz  
GB 0  
PC 1.40

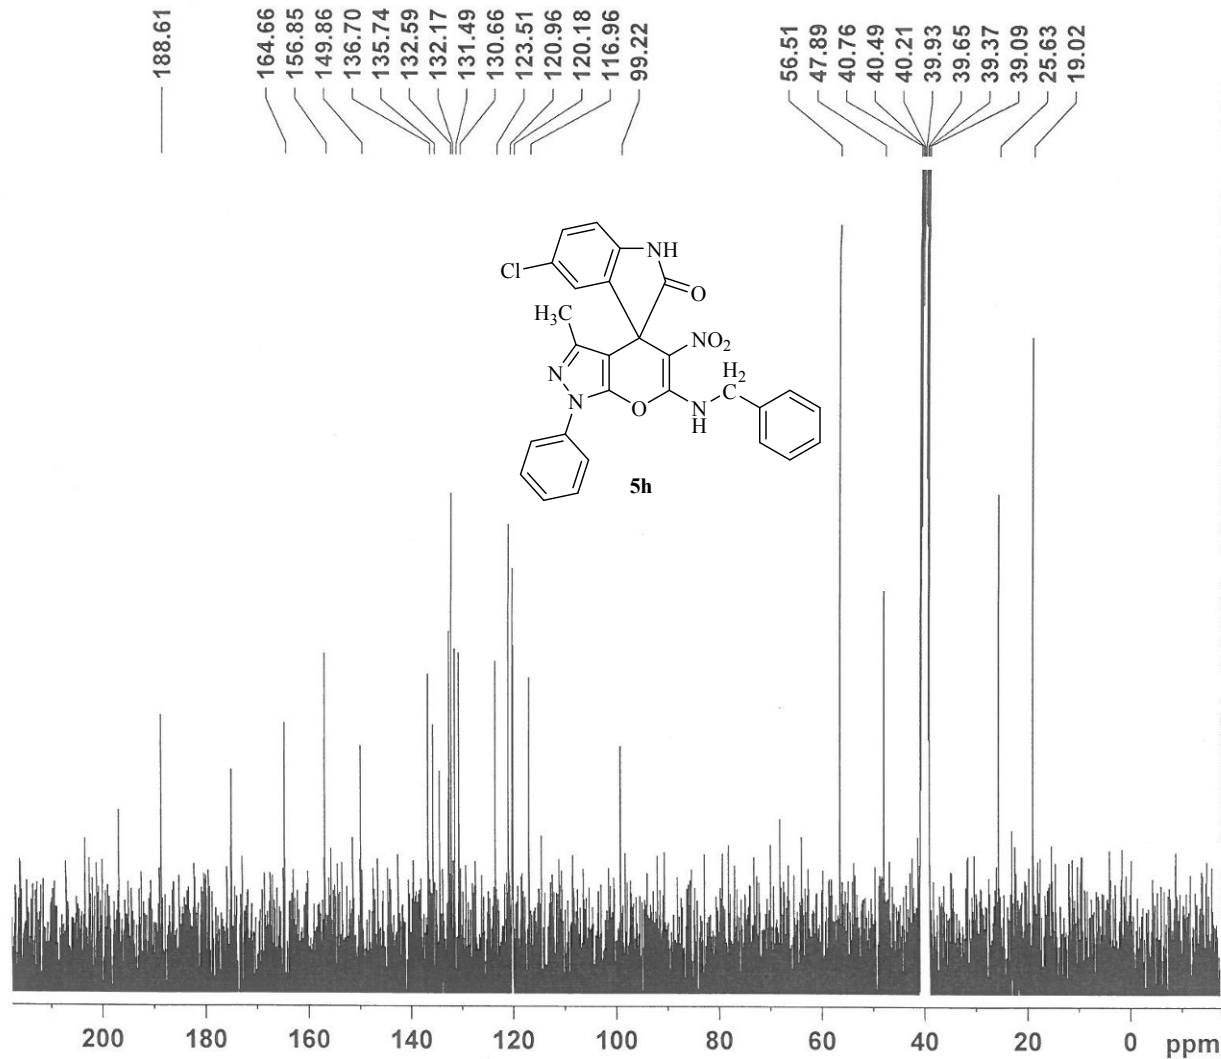

<sup>13</sup>C NMR of 5h



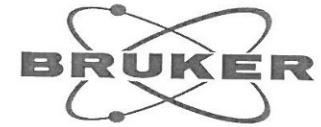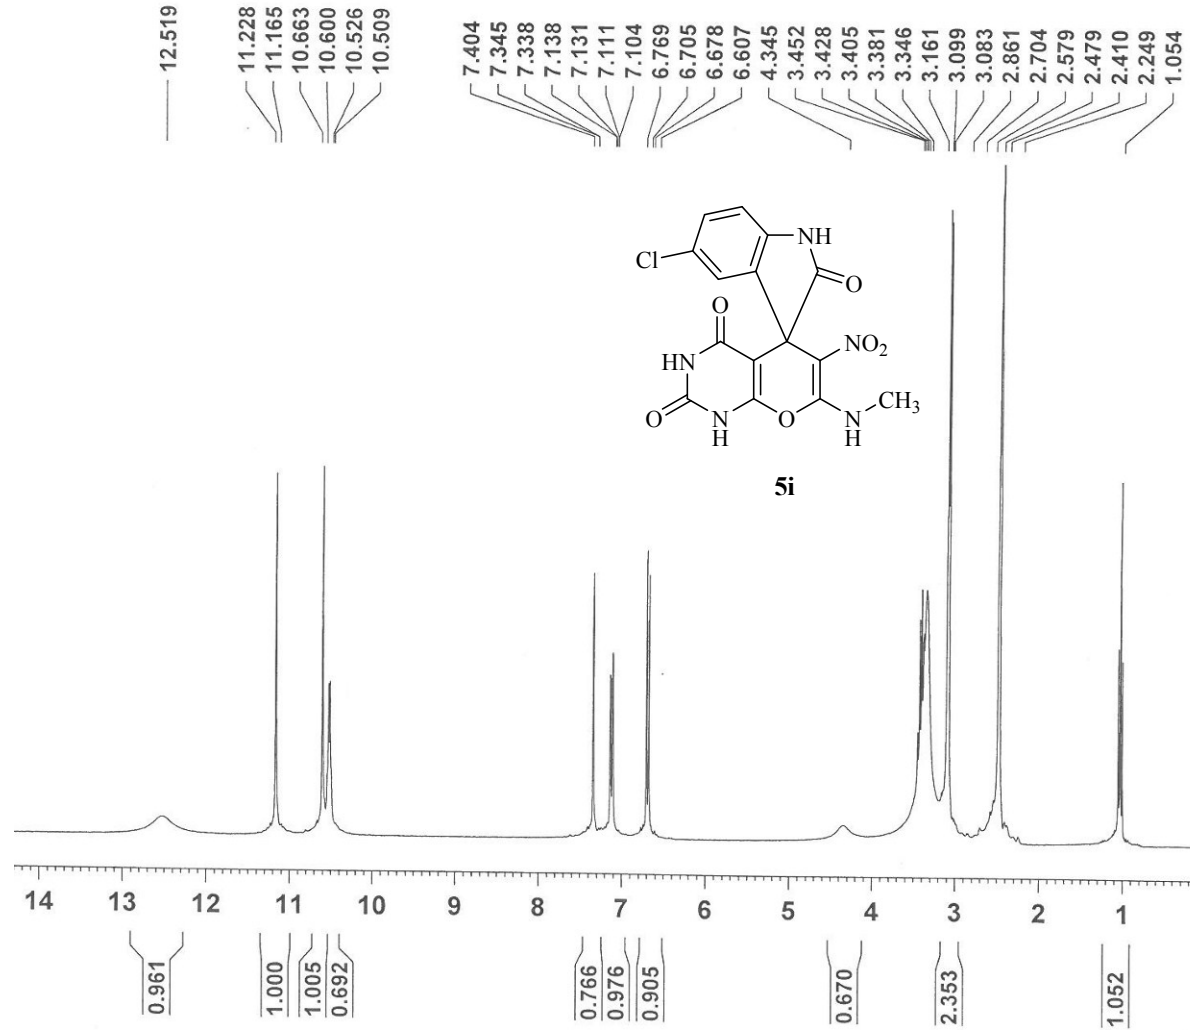

Current Data Parameters  
NAME AA.Mohamadi  
EXPNO 28  
PROCNO 1

F2 - Acquisition Parameters  
Date\_ 20161216  
Time 8.15  
INSTRUM spect  
PROBHD 5 mm BBO BB-1H  
PULPROG zg  
TD 16384  
SOLVENT DMSO  
NS 6  
DS 0  
SWH 5995.204 Hz  
FIDRES 0.365918 Hz  
AQ 1.3664756 sec  
RG 203.2  
DW 83.400 usec  
DE 6.00 usec  
TE 300.0 K  
D1 6.00000000 sec

==== CHANNEL f1 ====  
NUC1 1H  
P1 9.00 usec  
PL1 3.00 dB  
SFO1 299.8729987 MHz

F2 - Processing parameters  
SI 32768  
SF 299.8700035 MHz  
WDW EM  
SSB 0  
LB 0.30 Hz  
GB 0  
PC 1.00

<sup>1</sup>H NMR of 5i

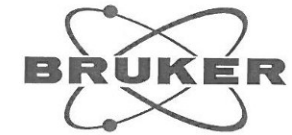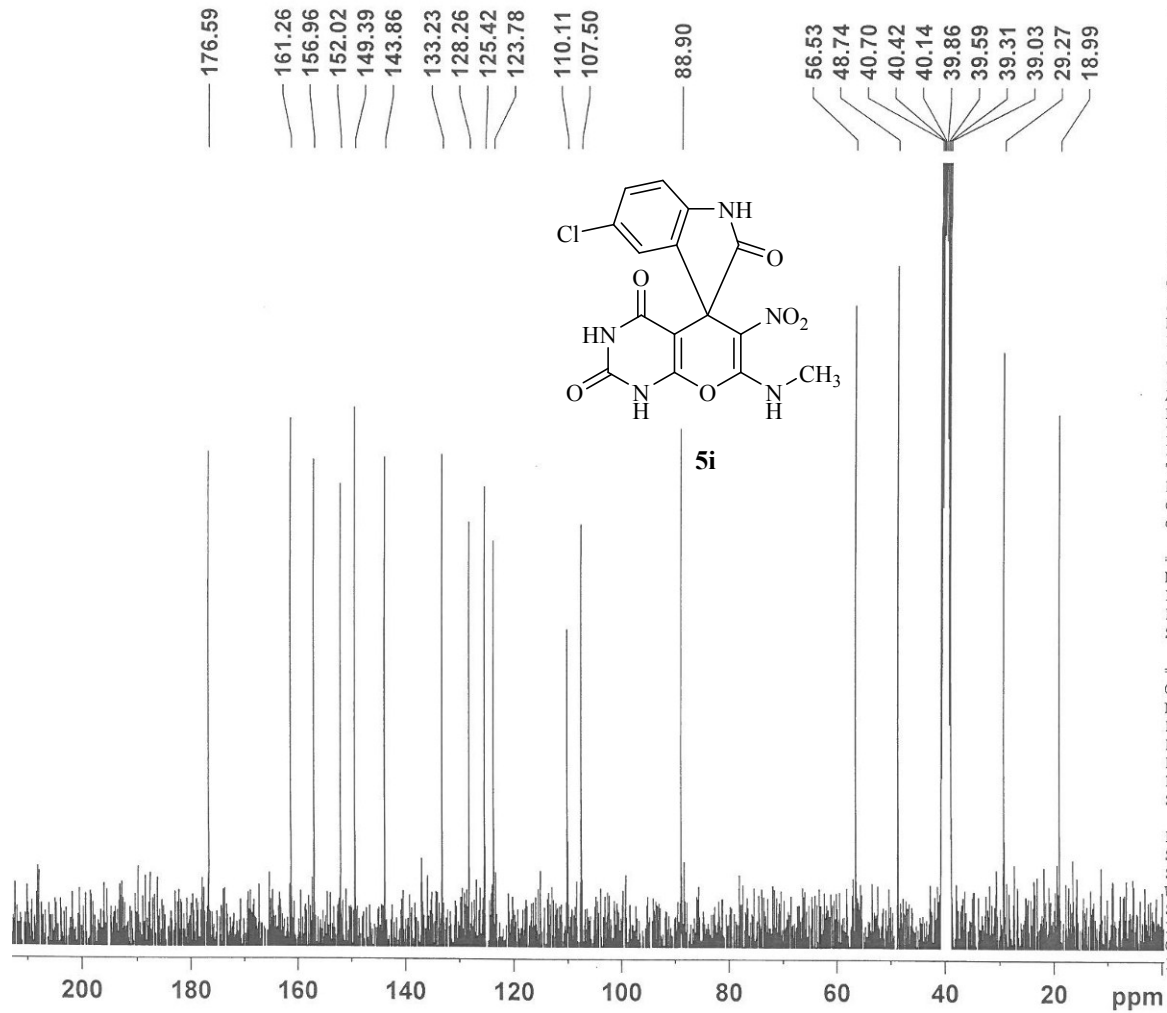

Current Data Parameters  
NAME AA.Mohamadi  
EXPNO 35  
PROCNO 1

F2 - Acquisition Parameters  
Date\_ 20161223  
Time 14.57  
INSTRUM spect  
PROBHD 5 mm BBO BB-1H  
PULPROG zgpg  
TD 65536  
SOLVENT DMSO  
NS 500  
DS 0  
SWH 17985.611 Hz  
FIDRES 0.274439 Hz  
AQ 1.8219508 sec  
RG 32768  
DW 27.800 usec  
DE 6.00 usec  
TE 300.0 K  
D1 4.0000000 sec  
d11 0.0300000 sec  
d12 0.0000200 sec

===== CHANNEL f1 =====  
NUC1 13C  
P1 14.00 usec  
PL1 -6.00 dB  
SFO1 75.4099117 MHz

===== CHANNEL f2 =====  
CPDPRG2 waltz16  
NUC2 1H  
PCPD2 80.00 usec  
PL2 3.00 dB  
PL12 23.00 dB  
PL13 23.00 dB  
SFO2 299.8711995 MHz

F2 - Processing parameters  
SI 32768  
SF 75.4023710 MHz  
WDW EM  
SSB 0  
LB 1.00 Hz  
GB 0  
PC 1.40

### <sup>13</sup>C NMR of 5i

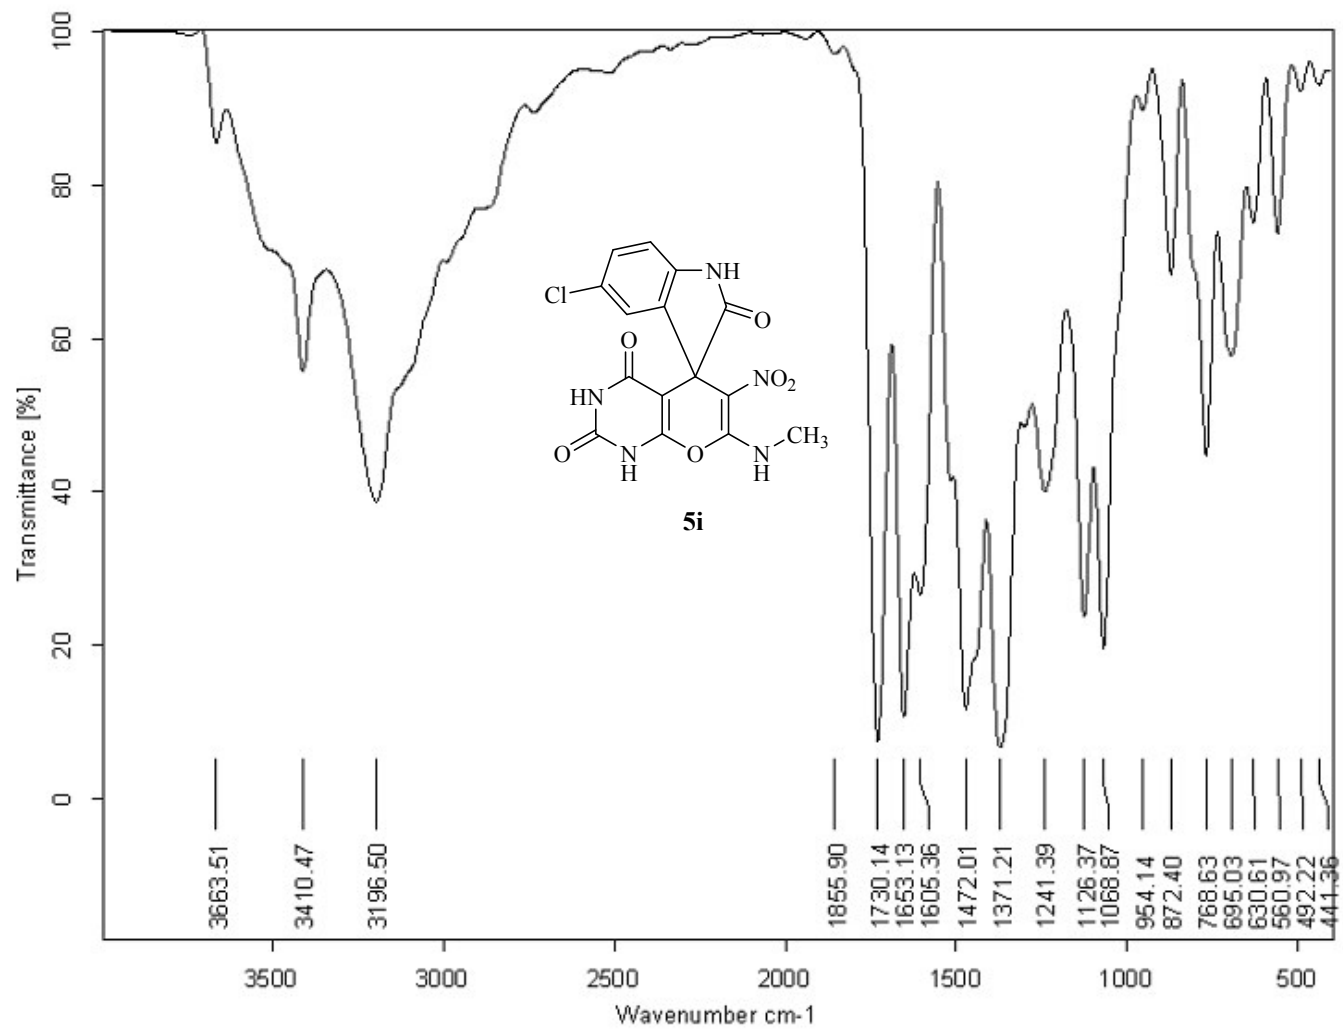

**IR of 5i**

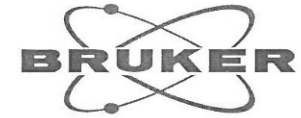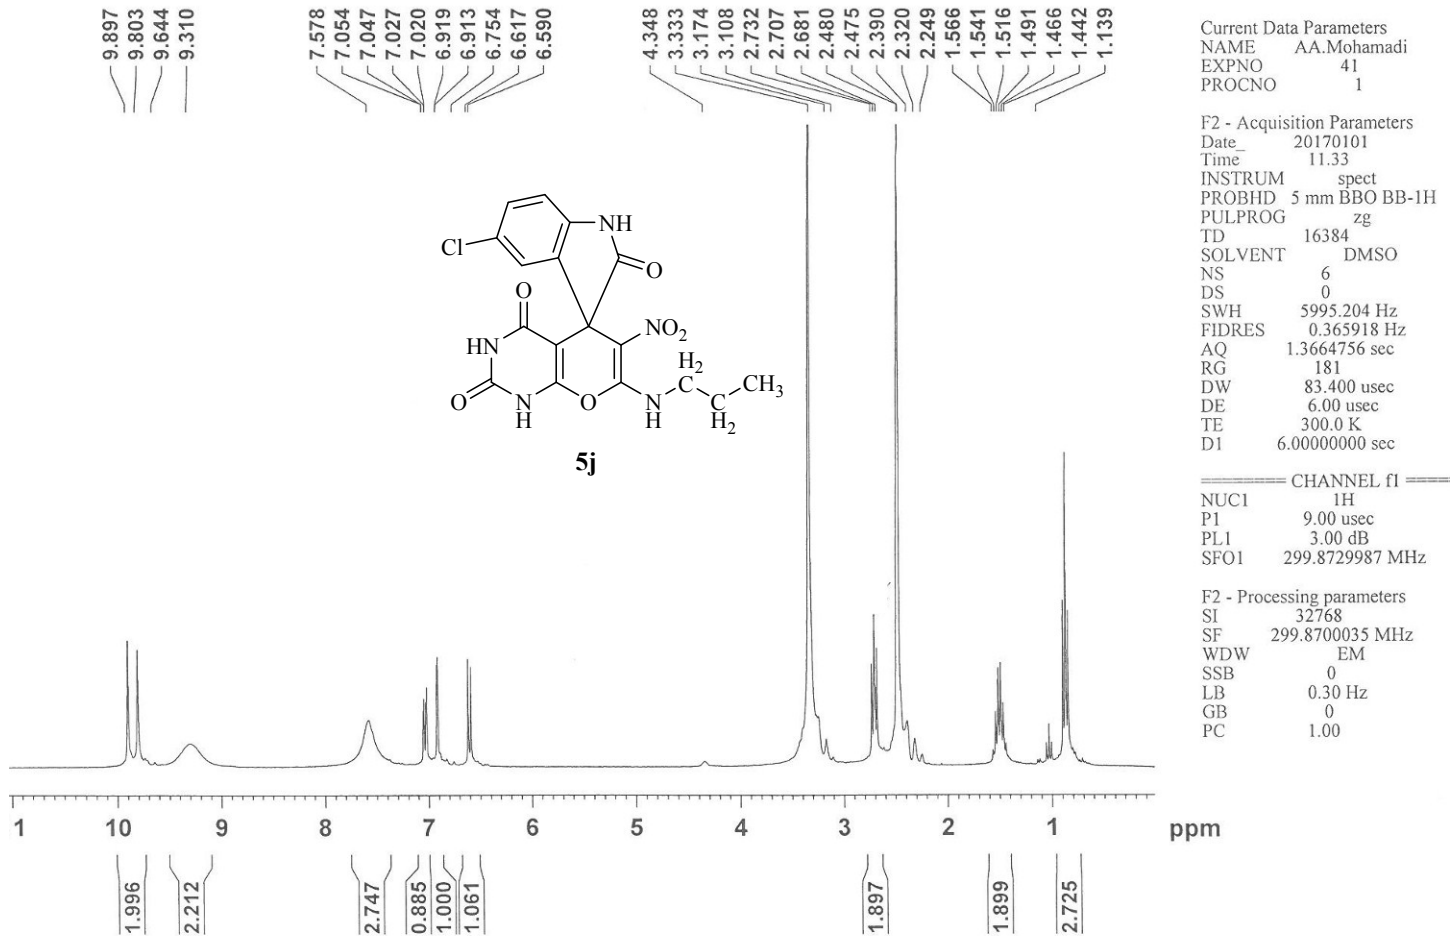

<sup>1</sup>H NMR of **5j**

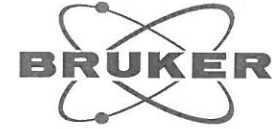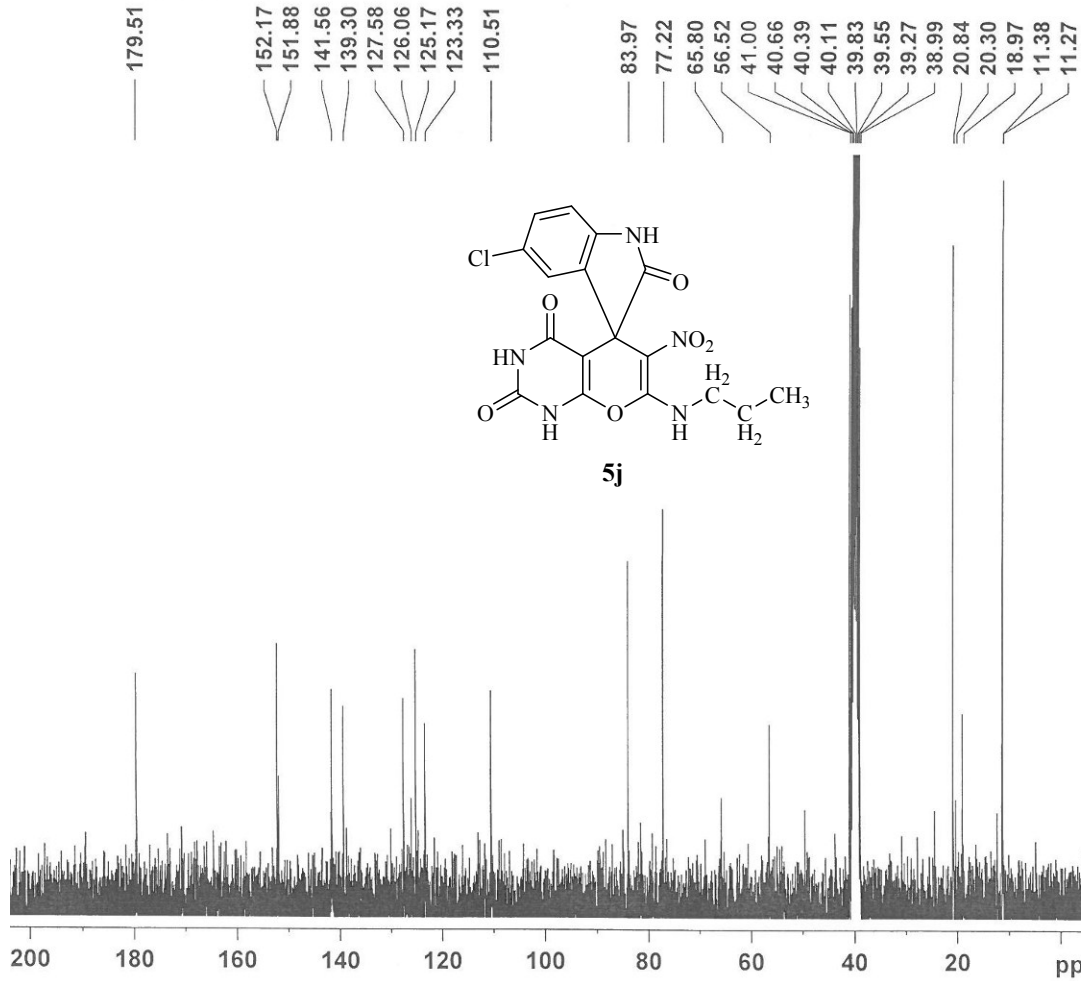

Current Data Parameters  
NAME AA.Mohamadi  
EXPNO 44  
PROCNO 1

F2 - Acquisition Parameters  
Date\_ 20170102  
Time\_ 15.16  
INSTRUM spect  
PROBHD 5 mm BBO BB-1H  
PULPROG zgpg  
TD 65536  
SOLVENT DMSO  
NS 500  
DS 0  
SWH 17985.611 Hz  
FIDRES 0.274439 Hz  
AQ 1.8219508 sec  
RG 32768  
DW 27.800 usec  
DE 6.00 usec  
TE 300.0 K  
D1 4.0000000 sec  
d11 0.0300000 sec  
d12 0.00002000 sec

=====  
CHANNEL f1  
NUC1 13C  
P1 14.00 usec  
PL1 -6.00 dB  
SFO1 75.4099117 MHz

=====  
CHANNEL f2  
CPDPRG2 waltz16  
NUC2 1H  
PCPD2 80.00 usec  
PL2 3.00 dB  
PL12 23.00 dB  
PL13 23.00 dB  
SFO2 299.8711995 MHz

F2 - Processing parameters  
SI 32768  
SF 75.4023710 MHz  
WDW EM  
SSB 0  
LB 1.00 Hz  
GB 0  
PC 1.40

<sup>13</sup>C NMR of 5j

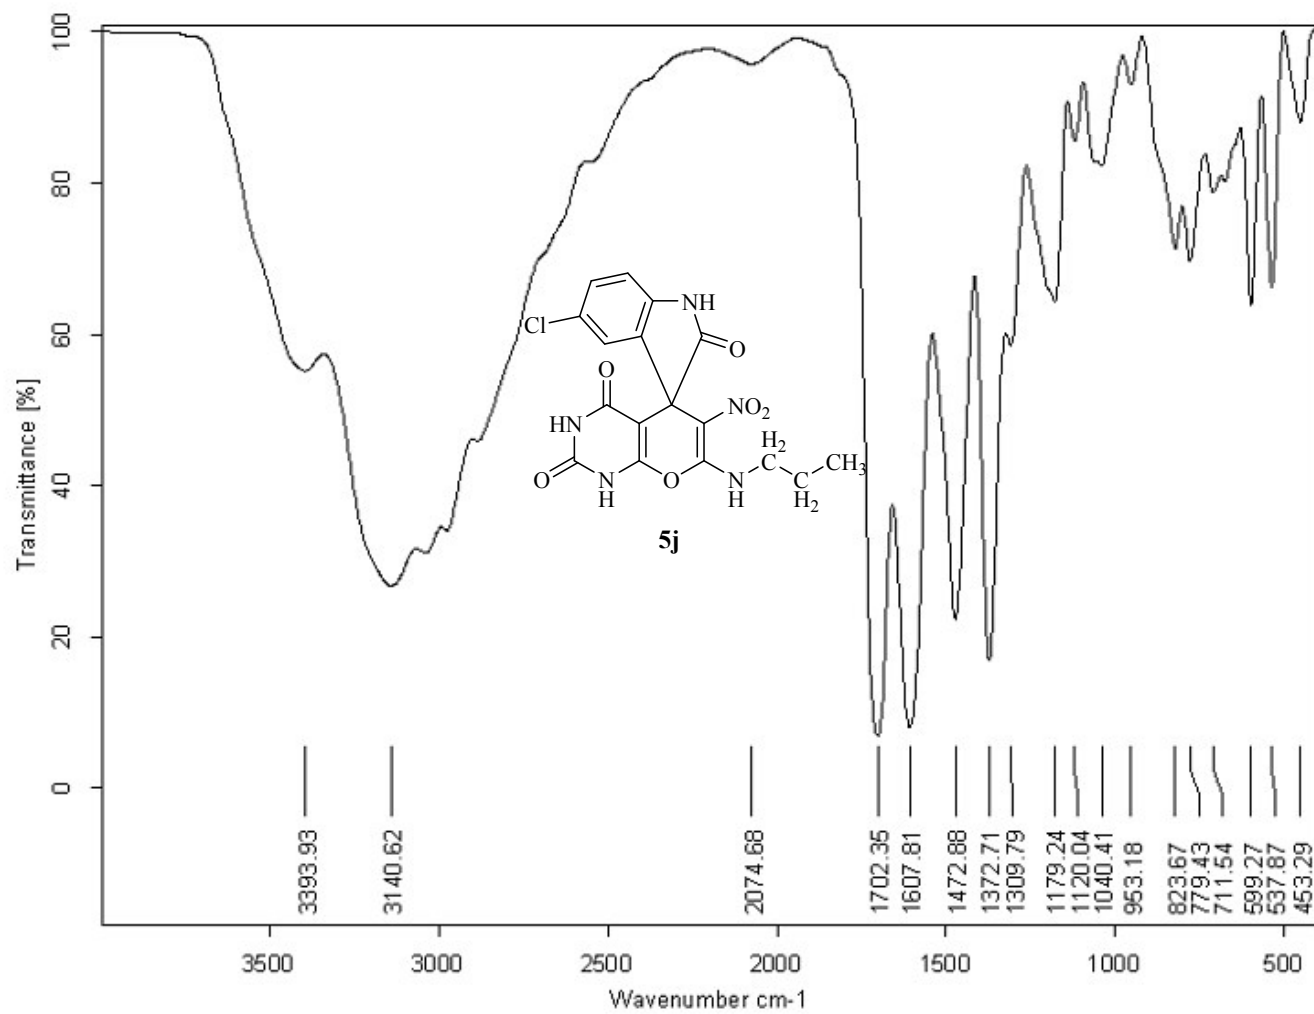

**IR of 5j**

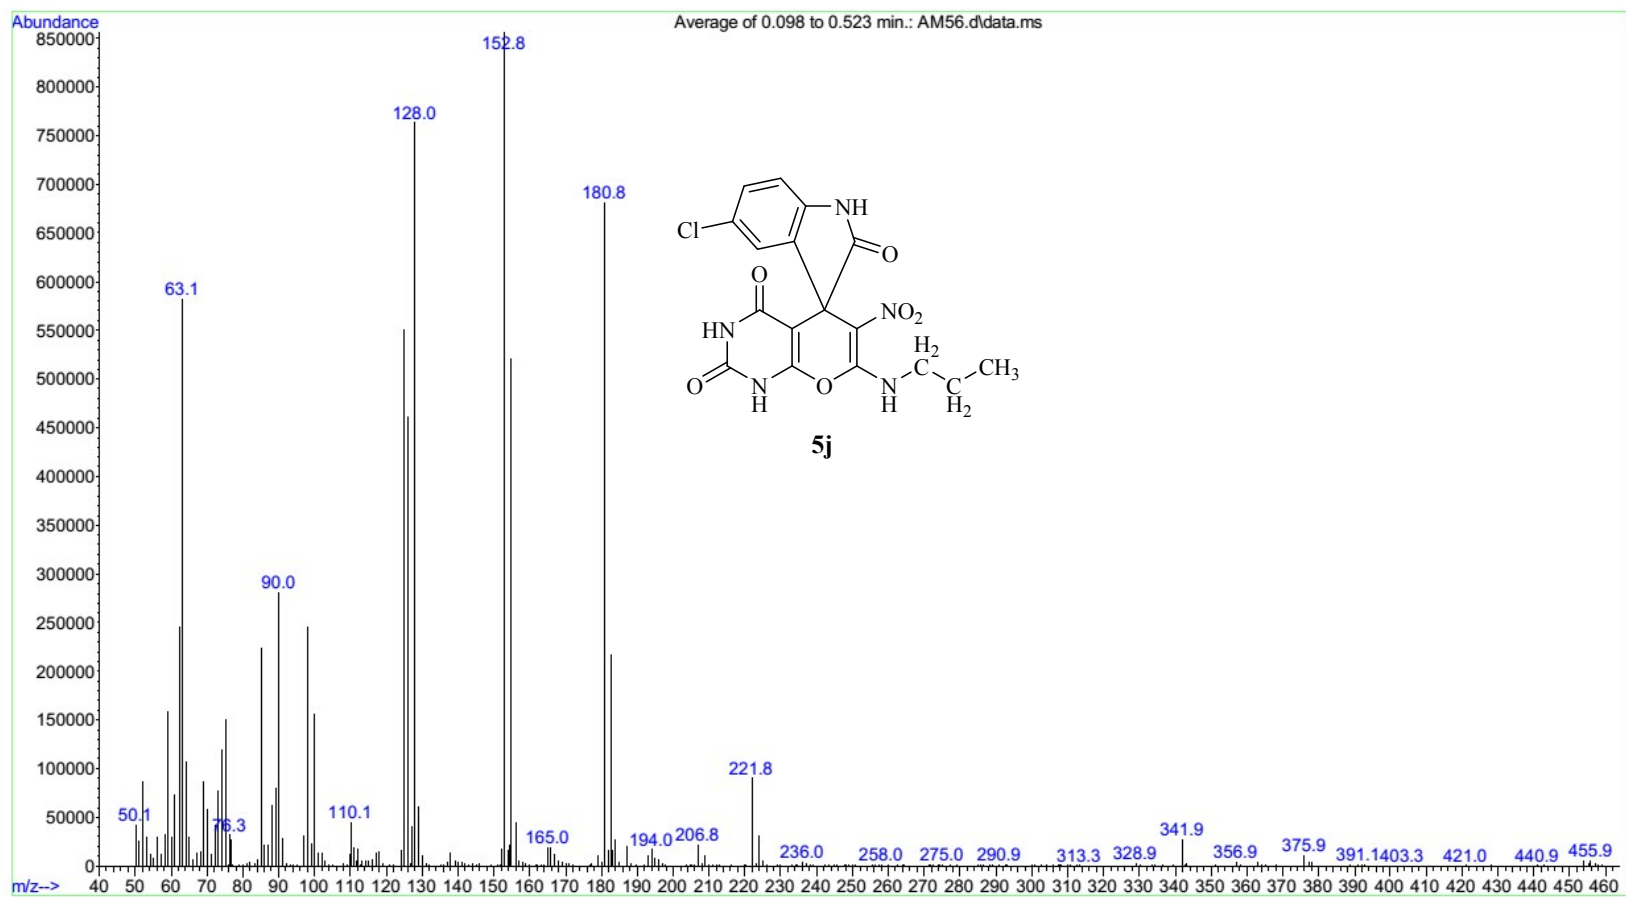

Mass of **5j**

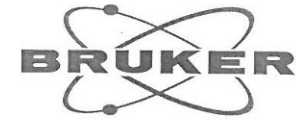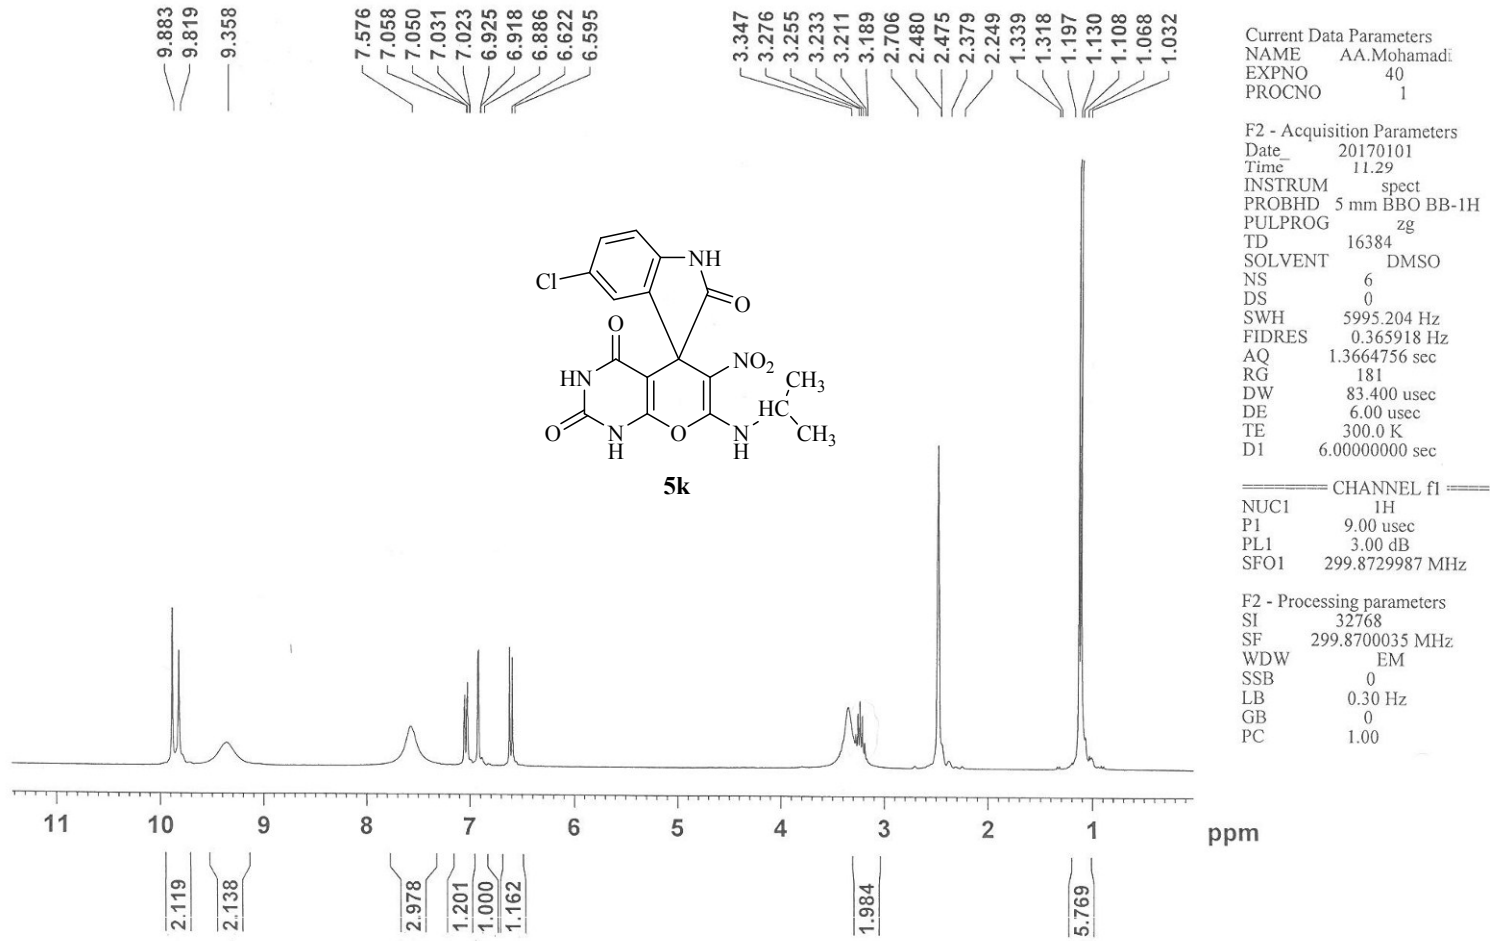

<sup>1</sup>H NMR of 5k



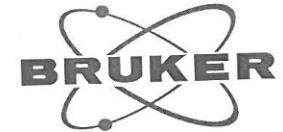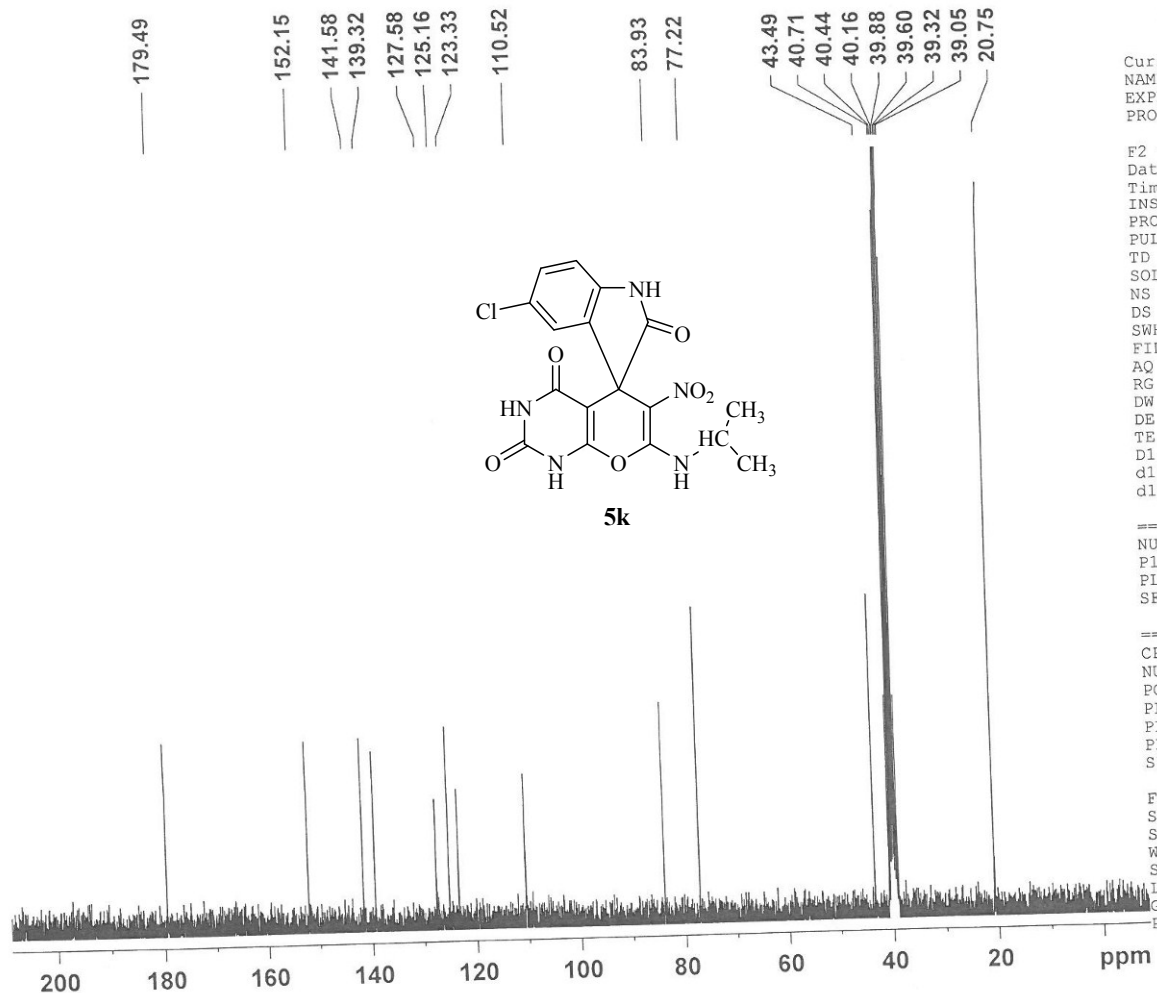

Current Data Parameters  
NAME AA.Mohamadi  
EXPNO 43  
PROCNO 1

F2 - Acquisition Parameters  
Date\_ 20170102  
Time\_ 14.23  
INSTRUM spect  
PROBHD 5 mm BBO BB-1H  
PULPROG zgpg  
TD 65536  
SOLVENT DMSO  
NS 302  
DS 0  
SWH 17985.611 Hz  
FIDRES 0.274439 Hz  
AQ 1.8219508 sec  
RG 32768  
DW 27.800 usec  
DE 6.00 usec  
TE 300.0 K  
D1 4.0000000 sec  
d11 0.0300000 sec  
d12 0.0000200 sec

==== CHANNEL f1 =====  
NUC1 13C  
P1 14.00 usec  
PL1 -6.00 dB  
SFO1 75.4099117 MHz

==== CHANNEL f2 =====  
CPDPRG2 waltz16  
NUC2 1H  
PCPD2 80.00 usec  
PL2 3.00 dB  
PL12 23.00 dB  
PL13 23.00 dB  
SFO2 299.8711995 MHz

F2 - Processing parameters  
SI 32768  
SF 75.4023710 MHz  
WDB EM  
SSB 0  
LB 1.00 Hz  
GB 0  
PC 1.40

<sup>13</sup>C NMR of 5k

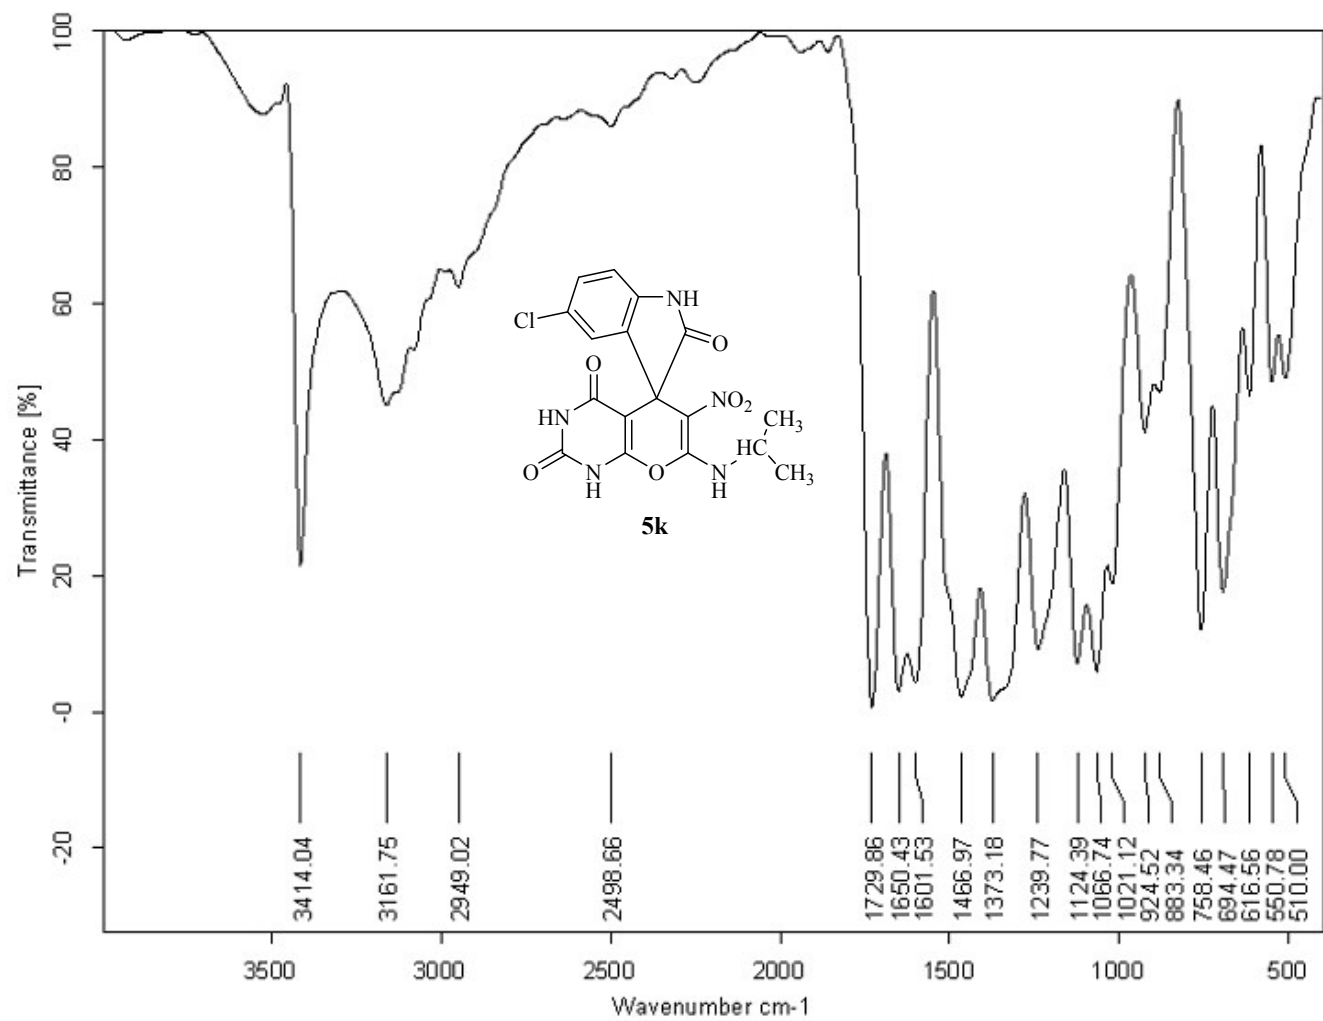

**IR of 5k**

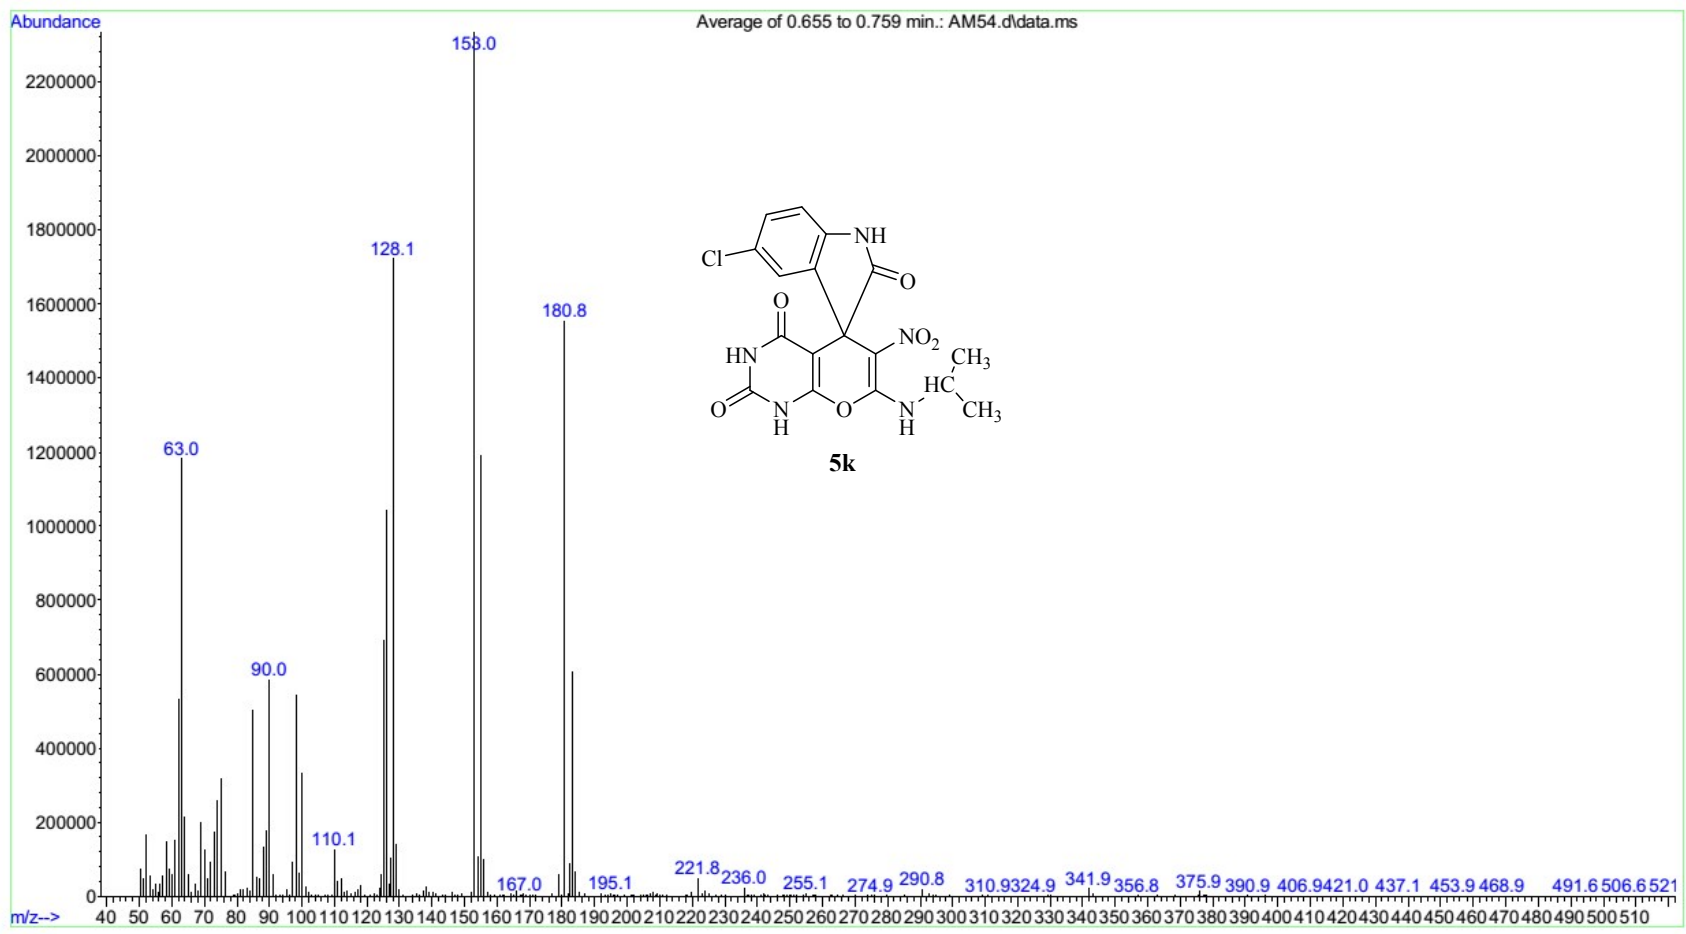

Mass of 5k

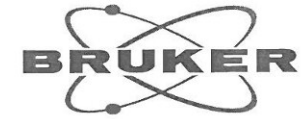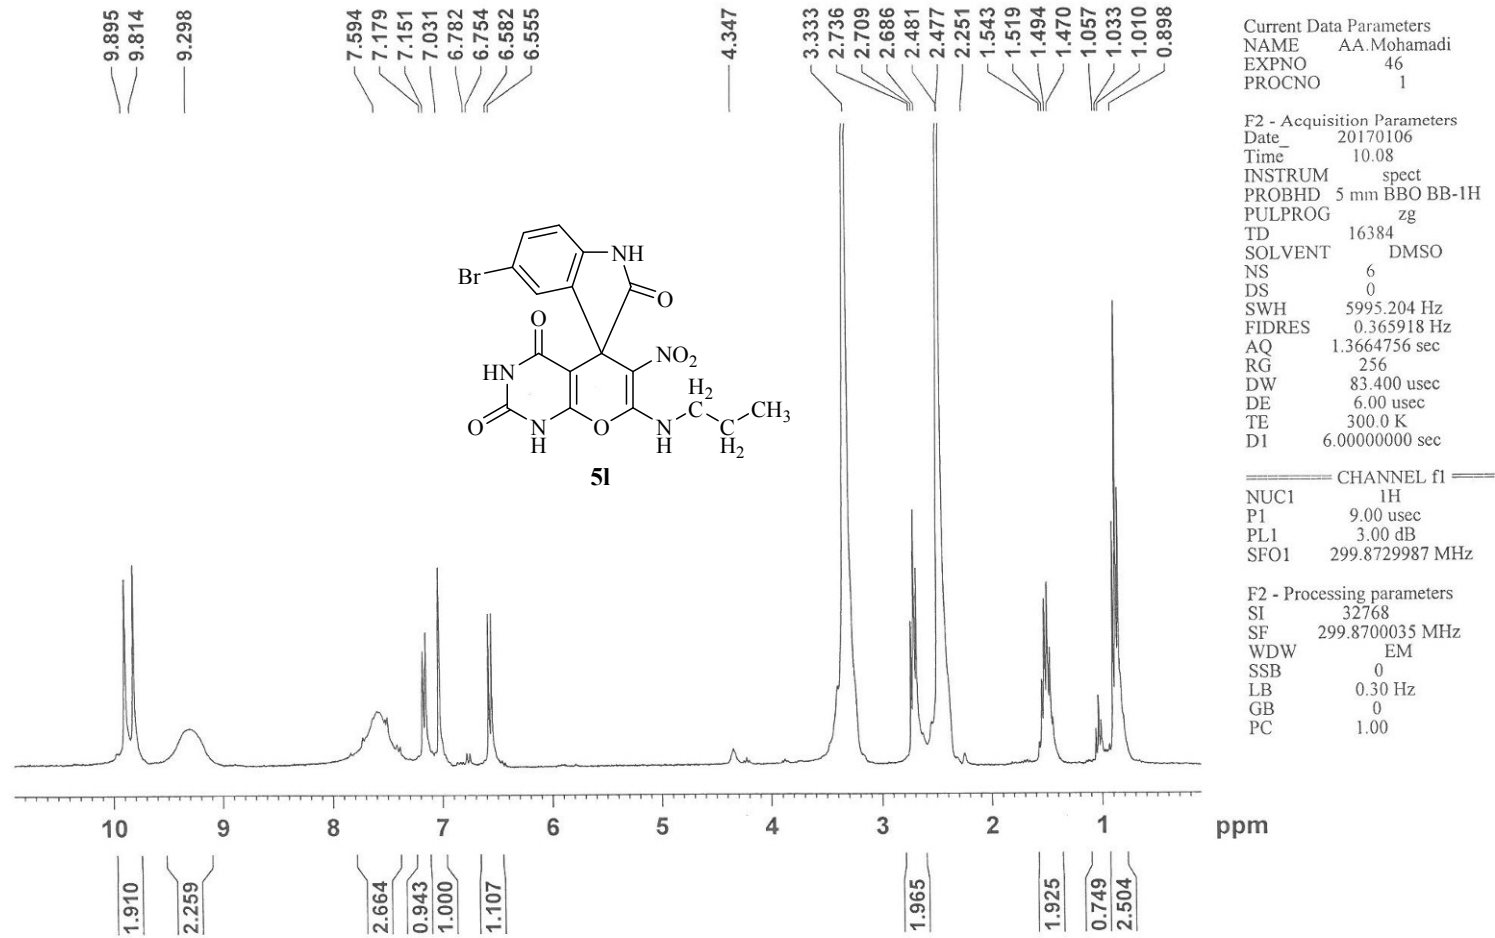

<sup>1</sup>H NMR of 51

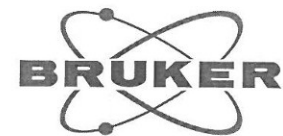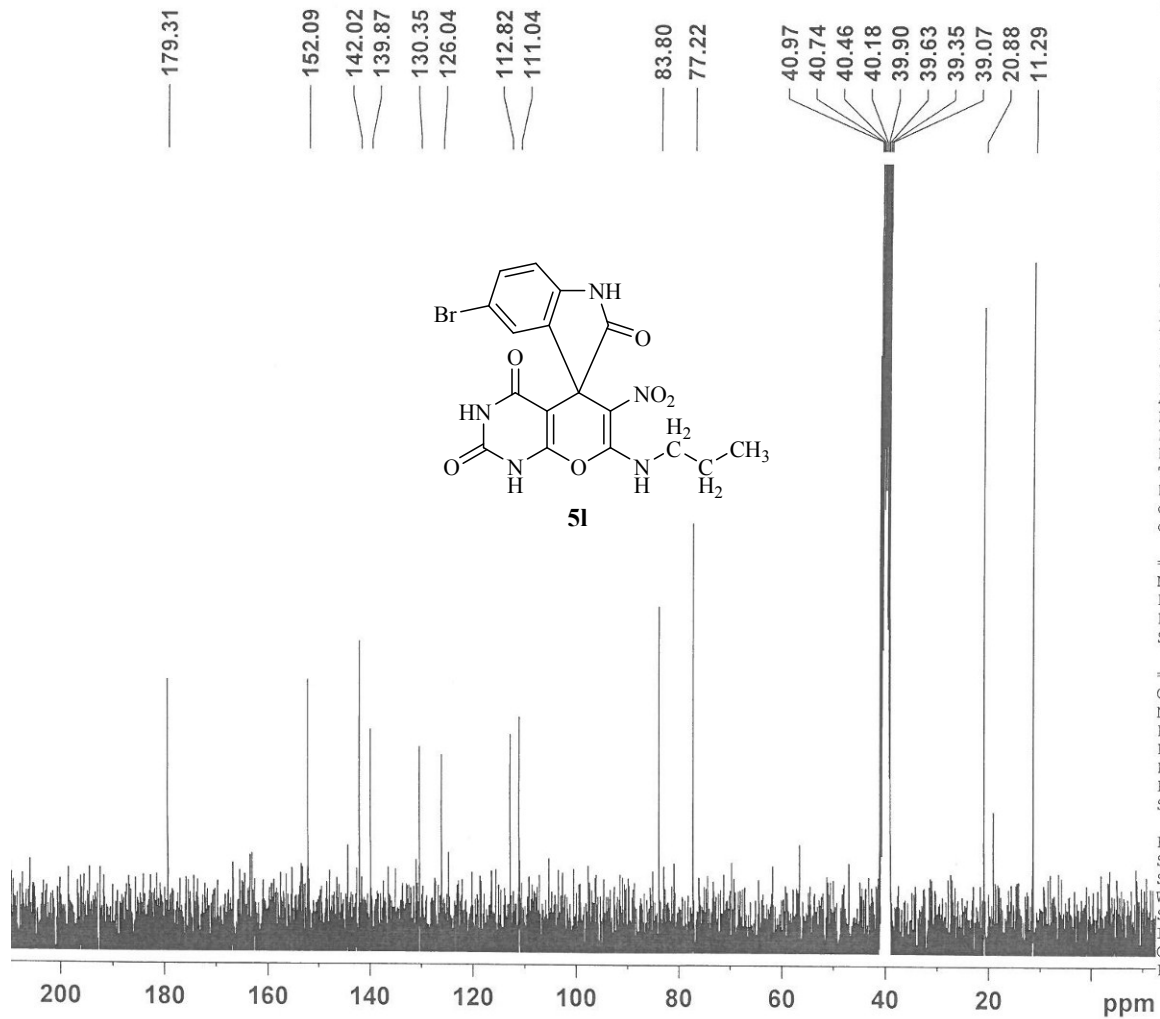

Current Data Parameters  
NAME AA.Mohamadi  
EXPNO 72  
PROCNO 1

F2 - Acquisition Parameters  
Date\_ 20170204  
Time 13.25  
INSTRUM spect  
PROBHD 5 mm BBO BB-1H  
PULPROG zgpg  
TD 65536  
SOLVENT DMSO  
NS 1500  
DS 0  
SWH 17985.611 Hz  
FIDRES 0.274439 Hz  
AQ 1.8219508 sec  
RG 32768  
DW 27.800 usec  
DE 6.00 usec  
TE 300.0 K  
D1 4.00000000 sec  
d11 0.03000000 sec  
d12 0.00002000 sec

=====  
CHANNEL f1  
NUC1 13C  
P1 14.00 usec  
PL1 -6.00 dB  
SFO1 75.4099117 MHz

=====  
CHANNEL f2  
CPDPRG2 waltz16  
NUC2 1H  
PCPD2 80.00 usec  
PL2 3.00 dB  
PL12 23.00 dB  
PL13 23.00 dB  
SFO2 299.8711995 MHz

F2 - Processing parameters  
SI 32768  
SF 75.4023710 MHz  
WDW EM  
SSB 0  
LB 1.00 Hz  
GB 0  
PC 1.40

<sup>13</sup>C NMR of 51

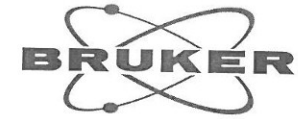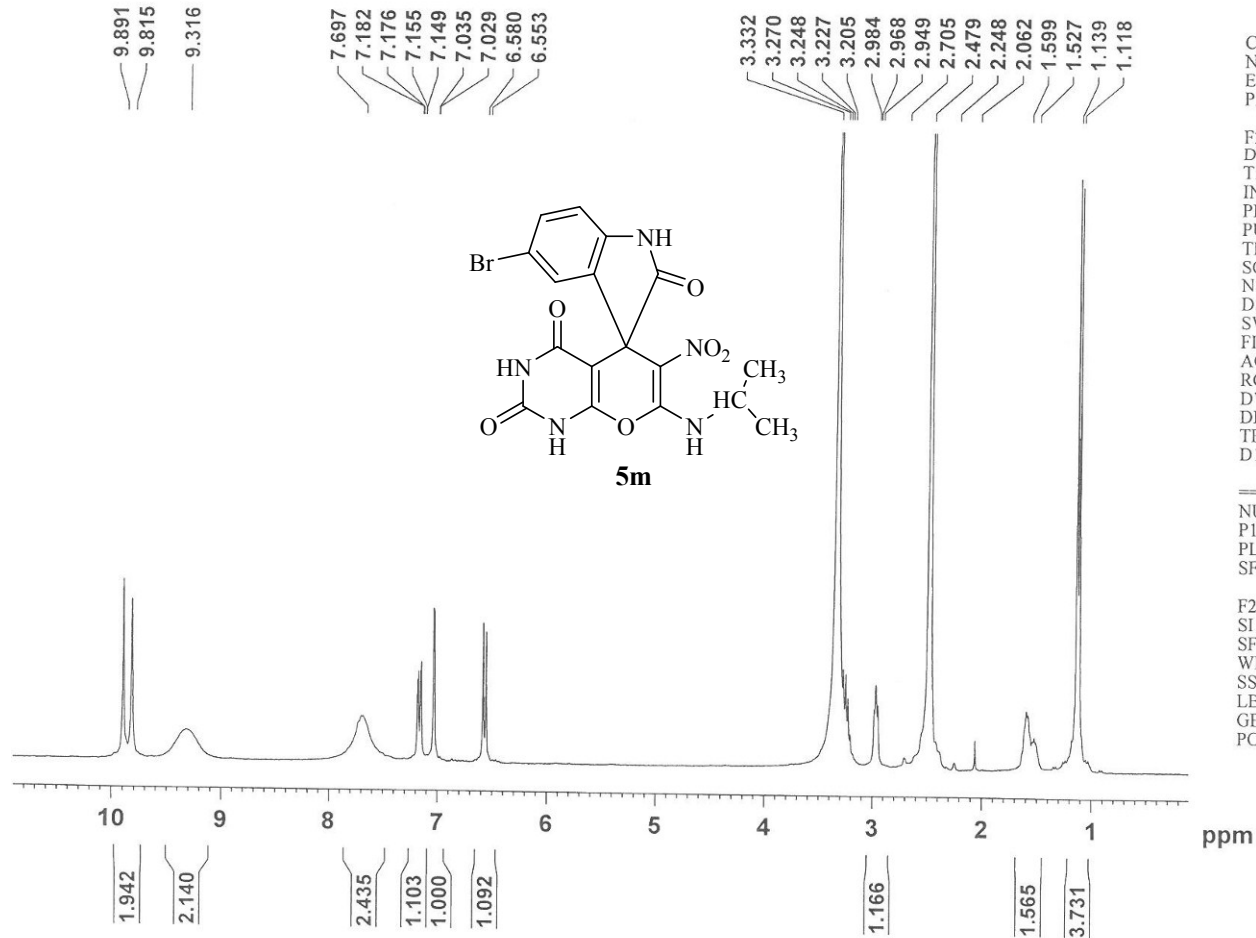

Current Data Parameters  
NAME AA.Mohamadi  
EXPNO 47  
PROCNO 1

F2 - Acquisition Parameters  
Date\_ 20170106  
Time 10.12  
INSTRUM spect  
PROBHD 5 mm BBO BB-1H  
PULPROG zg  
TD 16384  
SOLVENT DMSO  
NS 6  
DS 0  
SWH 5995.204 Hz  
FIDRES 0.365918 Hz  
AQ 1.3664756 sec  
RG 256  
DW 83.400 usec  
DE 6.00 usec  
TE 300.0 K  
D1 6.00000000 sec

===== CHANNEL f1 =====  
NUC1 1H  
P1 9.00 usec  
PL1 3.00 dB  
SFO1 299.8729987 MHz

F2 - Processing parameters  
SI 32768  
SF 299.8700035 MHz  
WDW EM  
SSB 0  
LB 0.30 Hz  
GB 0  
PC 1.00

<sup>1</sup>H NMR of 5m

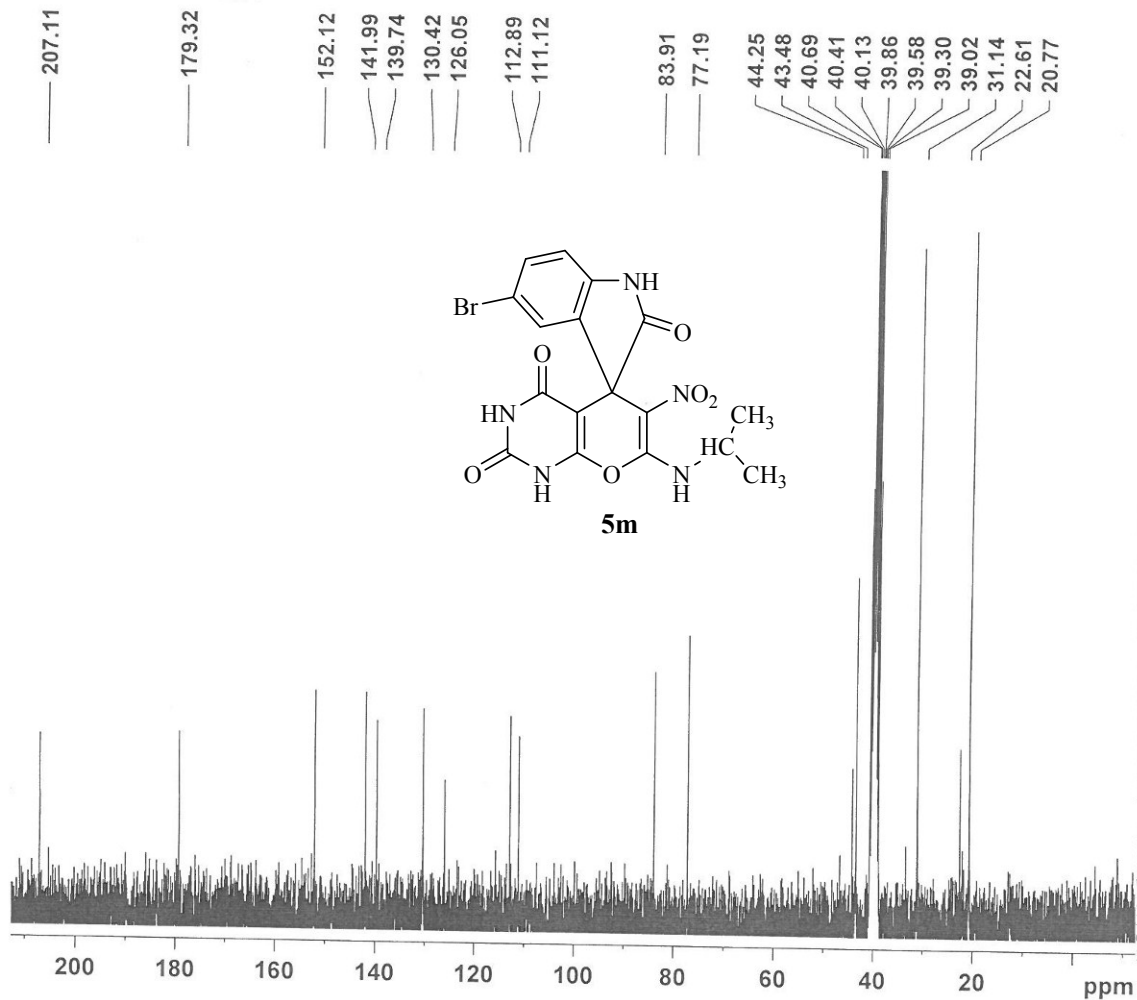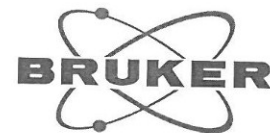

Current Data Parameters  
 NAME AA.Mohamadi  
 EXPNO 73  
 PROCNO 1

F2 - Acquisition Parameters  
 Date\_ 20170204  
 Time 10.56  
 INSTRUM spect  
 PROBHD 5 mm BBO BB-1H  
 PULPROG zgpg  
 TD 65536  
 SOLVENT DMSO  
 NS 670  
 DS 0  
 SWH 17985.611 Hz  
 FIDRES 0.274439 Hz  
 AQ 1.8219508 sec  
 RG 32768  
 DW 27.800 usec  
 DE 6.00 usec  
 TE 300.0 K  
 D1 4.0000000 sec  
 d11 0.0300000 sec  
 d12 0.0000200 sec

===== CHANNEL f1 =====  
 NUC1 13C  
 P1 14.00 usec  
 PL1 -6.00 dB  
 SFO1 75.4099117 MHz

===== CHANNEL f2 =====  
 CPDPRG2 waltz16  
 NUC2 1H  
 PCPD2 80.00 usec  
 PL2 3.00 dB  
 PL12 23.00 dB  
 PL13 23.00 dB  
 SFO2 299.8711995 MHz

F2 - Processing parameters  
 SI 32768  
 SF 75.4023710 MHz  
 WDW EM  
 SSB 0  
 LB 1.00 Hz  
 GB 0  
 PC 1.40

**<sup>13</sup>C NMR of 5m**

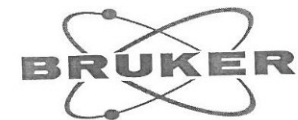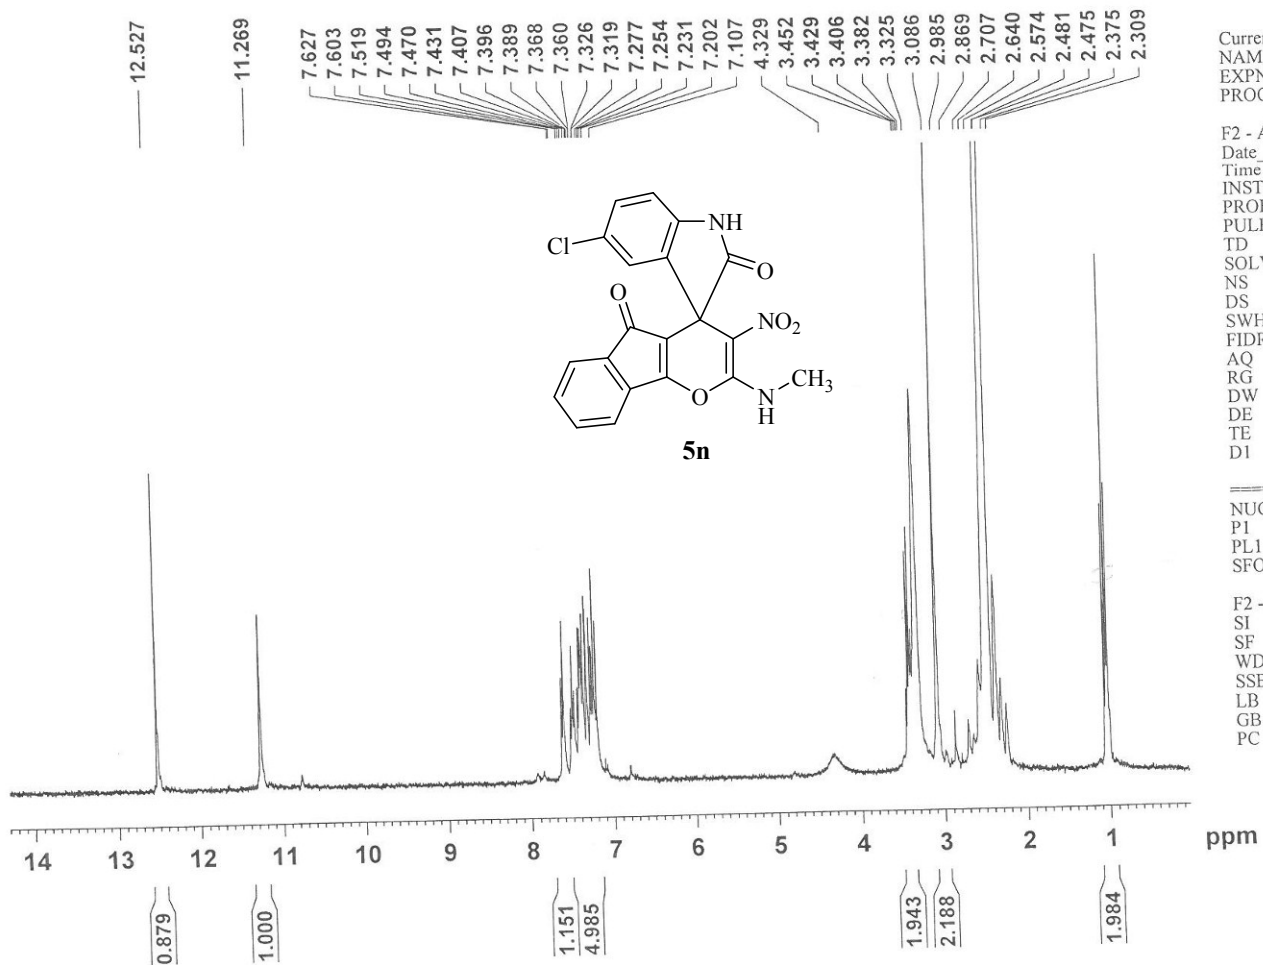

Current Data Parameters  
NAME AA.Mohamadi  
EXPNO 59  
PROCNO 1

F2 - Acquisition Parameters  
Date 20170127  
Time 14.39  
INSTRUM spect  
PROBHD 5 mm BBO BB-1H  
PULPROG zg  
TD 16384  
SOLVENT DMSO  
NS 6  
DS 0  
SWH 5995.204 Hz  
FIDRES 0.365918 Hz  
AQ 1.3664756 sec  
RG 645.1  
DW 83.400 usec  
DE 6.00 usec  
TE 300.0 K  
D1 6.00000000 sec

==== CHANNEL f1 ====  
NUC1 1H  
P1 9.00 usec  
PL1 3.00 dB  
SFO1 299.8729987 MHz

F2 - Processing parameters  
SI 32768  
SF 299.8700035 MHz  
WDW EM  
SSB 0  
LB 0.30 Hz  
GB 0  
PC 1.00

**<sup>1</sup>H NMR of 5n**



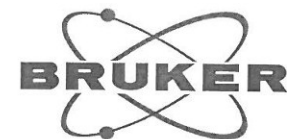

Current Data Parameters  
NAME AA.Mohamadi  
EXPNO 81  
PROCNO 1

F2 - Acquisition Parameters  
Date\_ 20170217  
Time 11.54  
INSTRUM spect  
PROBHD 5 mm BBO BB-1H  
PULPROG zgpg  
TD 65536  
SOLVENT DMSO  
NS 1040  
DS 0  
SWH 17985.611 Hz  
FIDRES 0.274439 Hz  
AQ 1.8219508 sec  
RG 32768  
DW 27.800 usec  
DE 6.00 usec  
TE 300.0 K  
D1 4.00000000 sec  
d11 0.03000000 sec  
d12 0.00002000 sec

=====  
CHANNEL f1  
NUC1 13C  
P1 14.00 usec  
PL1 -6.00 dB  
SFO1 75.4099117 MHz

=====  
CHANNEL f2  
CPDPRG2 waltz16  
NUC2 1H  
PCPD2 80.00 usec  
PL2 3.00 dB  
PL12 23.00 dB  
PL13 23.00 dB  
SFO2 299.8711995 MHz

F2 - Processing parameters  
SI 32768  
SF 75.4023710 MHz  
WDW EM  
SSB 0  
LB 1.00 Hz  
GB 0  
PC 1.40

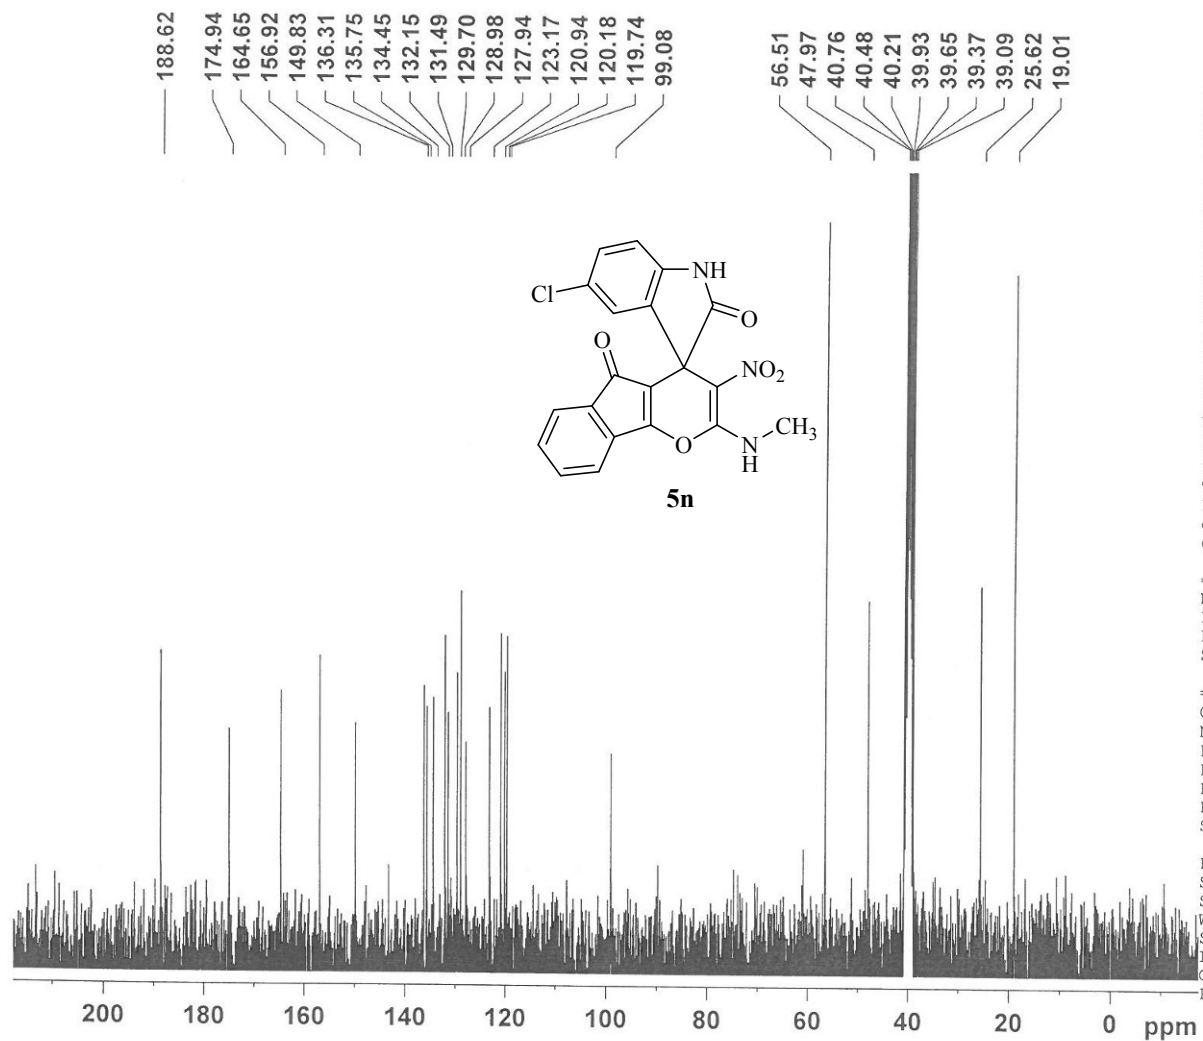

<sup>13</sup>C NMR of 5n

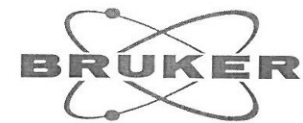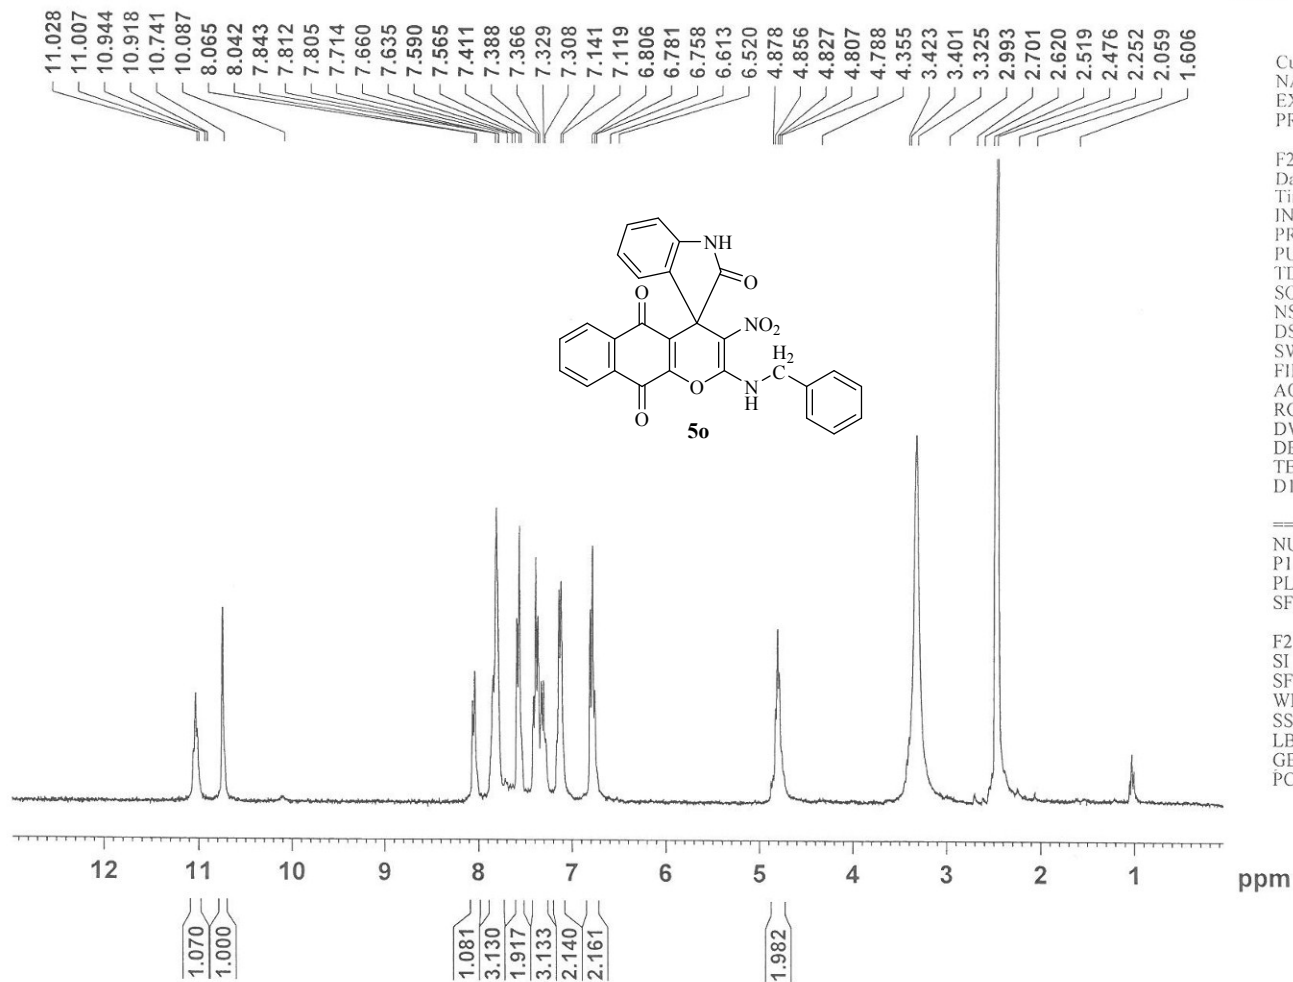

Current Data Parameters  
NAME AA.Mohamadi  
EXPNO 83  
PROCNO 1

F2 - Acquisition Parameters  
Date\_ 20170219  
Time 11.58  
INSTRUM spect  
PROBHD 5 mm BBO BB-1H  
PULPROG zg  
TD 16384  
SOLVENT DMSO  
NS 6  
DS 0  
SWH 5995.204 Hz  
FIDRES 0.365918 Hz  
AQ 1.3664756 sec  
RG 812.7  
DW 83.400 usec  
DE 6.00 usec  
TE 300.0 K  
D1 6.00000000 sec

==== CHANNEL f1 ====  
NUC1 1H  
P1 9.00 usec  
PL1 3.00 dB  
SFO1 299.8729987 MHz

F2 - Processing parameters  
SI 32768  
SF 299.8700035 MHz  
WDW EM  
SSB 0  
LB 0.30 Hz  
GB 0  
PC 1.00

<sup>1</sup>H NMR of **5o**

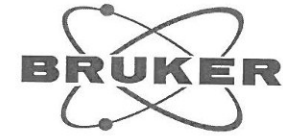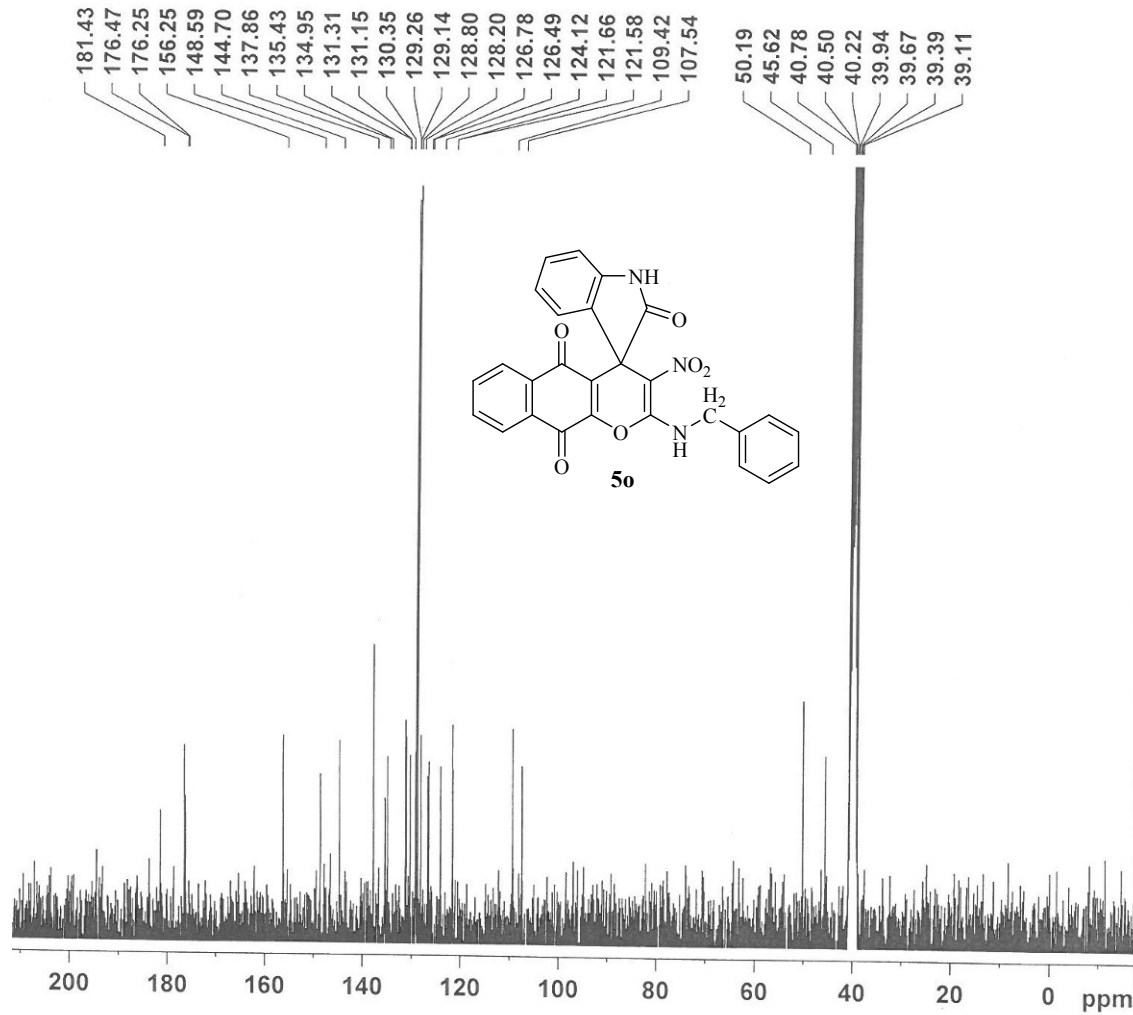

Current Data Parameters  
NAME AA.Mohamadi  
EXPNO 86  
PROCNO 1

F2 - Acquisition Parameters  
Date\_ 20170302  
Time\_ 14.27  
INSTRUM spect  
PROBHD 5 mm BBO BB-1H  
PULPROG zgpg  
TD 65536  
SOLVENT DMSO  
NS 2500  
DS 0  
SWH 17985.611 Hz  
FIDRES 0.274439 Hz  
AQ 1.8219508 sec  
RG 32768  
DW 27.800 usec  
DE 6.00 usec  
TE 300.0 K  
D1 4.00000000 sec  
d11 0.03000000 sec  
d12 0.00002000 sec

===== CHANNEL f1 =====  
NUC1 13C  
P1 14.00 usec  
PL1 -6.00 dB  
SFO1 75.4099117 MHz

===== CHANNEL f2 =====  
CPDPRG2 waltz16  
NUC2 1H  
PCPD2 80.00 usec  
PL2 3.00 dB  
PL12 23.00 dB  
PL13 23.00 dB  
SFO2 299.8711995 MHz

F2 - Processing parameters  
SI 32768  
SF 75.4023710 MHz  
WDW EM  
SSB 0  
LB 1.00 Hz  
GB 0  
PC 1.40

1D NMR plot parameters  
CX 20.00 cm  
CY 233.22 cm  
F1P 219.271 ppm  
F1 16533.52 Hz  
F2P -19.258 ppm  
F2 -1452.10 Hz  
PPMCM 11.92642 ppm/cm  
HZCM 899.28064 Hz/cm

<sup>13</sup>C NMR of 5o

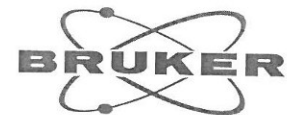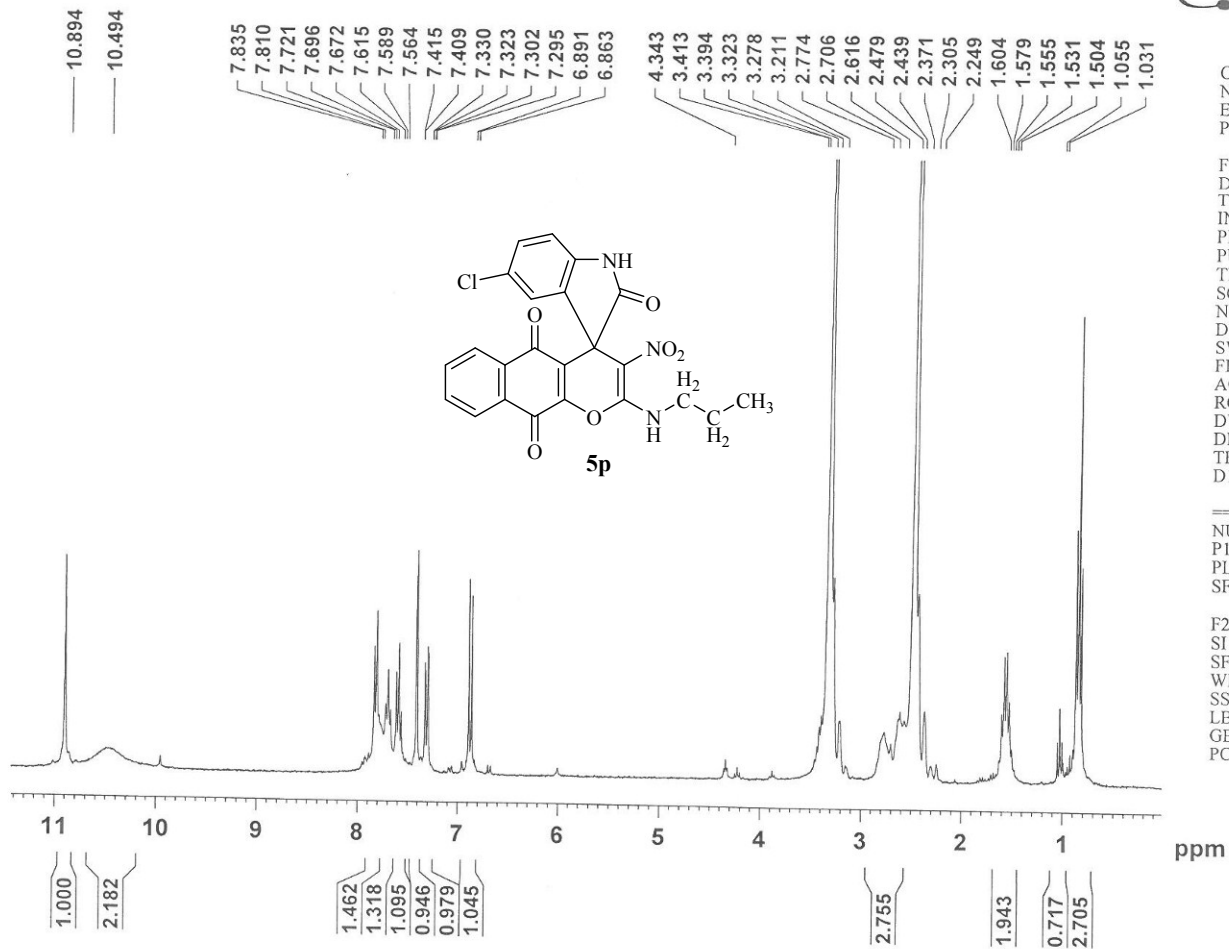

Current Data Parameters  
NAME AA.Mohamadi  
EXPNO 42  
PROCNO 1

F2 - Acquisition Parameters  
Date\_ 20170101  
Time 14.58  
INSTRUM spect  
PROBHD 5 mm BBO BB-1H  
PULPROG zg  
TD 16384  
SOLVENT DMSO  
NS 6  
DS 0  
SWH 5995.204 Hz  
FIDRES 0.365918 Hz  
AQ 1.3664756 sec  
RG 287.4  
DW 83.400 usec  
DE 6.00 usec  
TE 300.0 K  
D1 6.00000000 sec

===== CHANNEL f1 =====  
NUC1 1H  
P1 9.00 usec  
PL1 3.00 dB  
SFO1 299.8729987 MHz

F2 - Processing parameters  
SI 32768  
SF 299.8700035 MHz  
WDW EM  
SSB 0  
LB 0.30 Hz  
GB 0  
PC 1.00

<sup>1</sup>H NMR of 5p

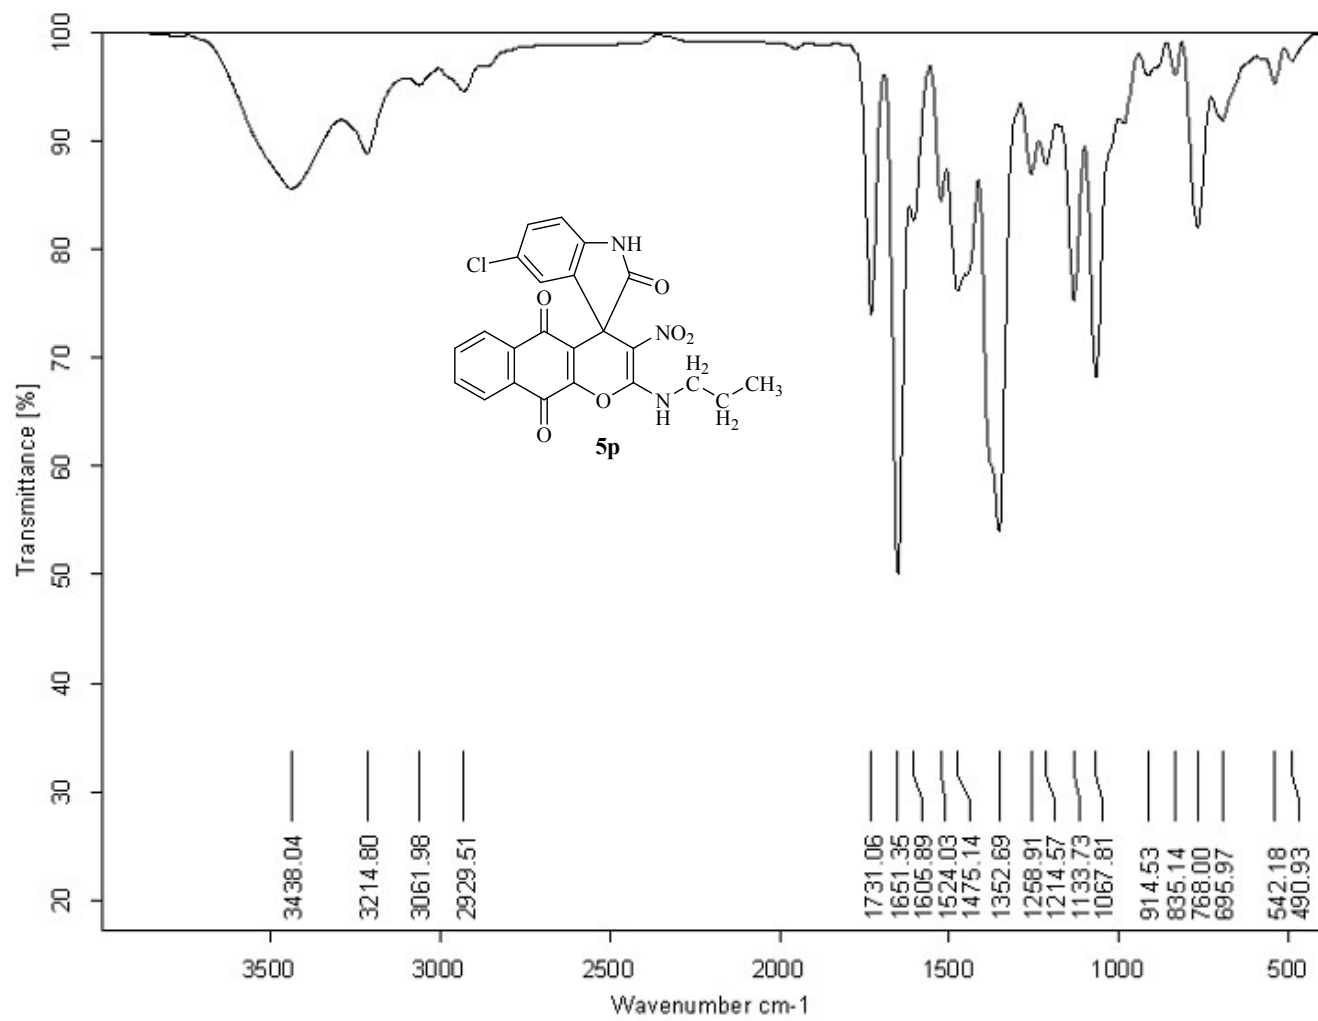

IR of 5p

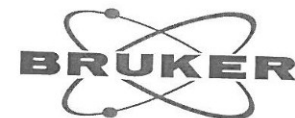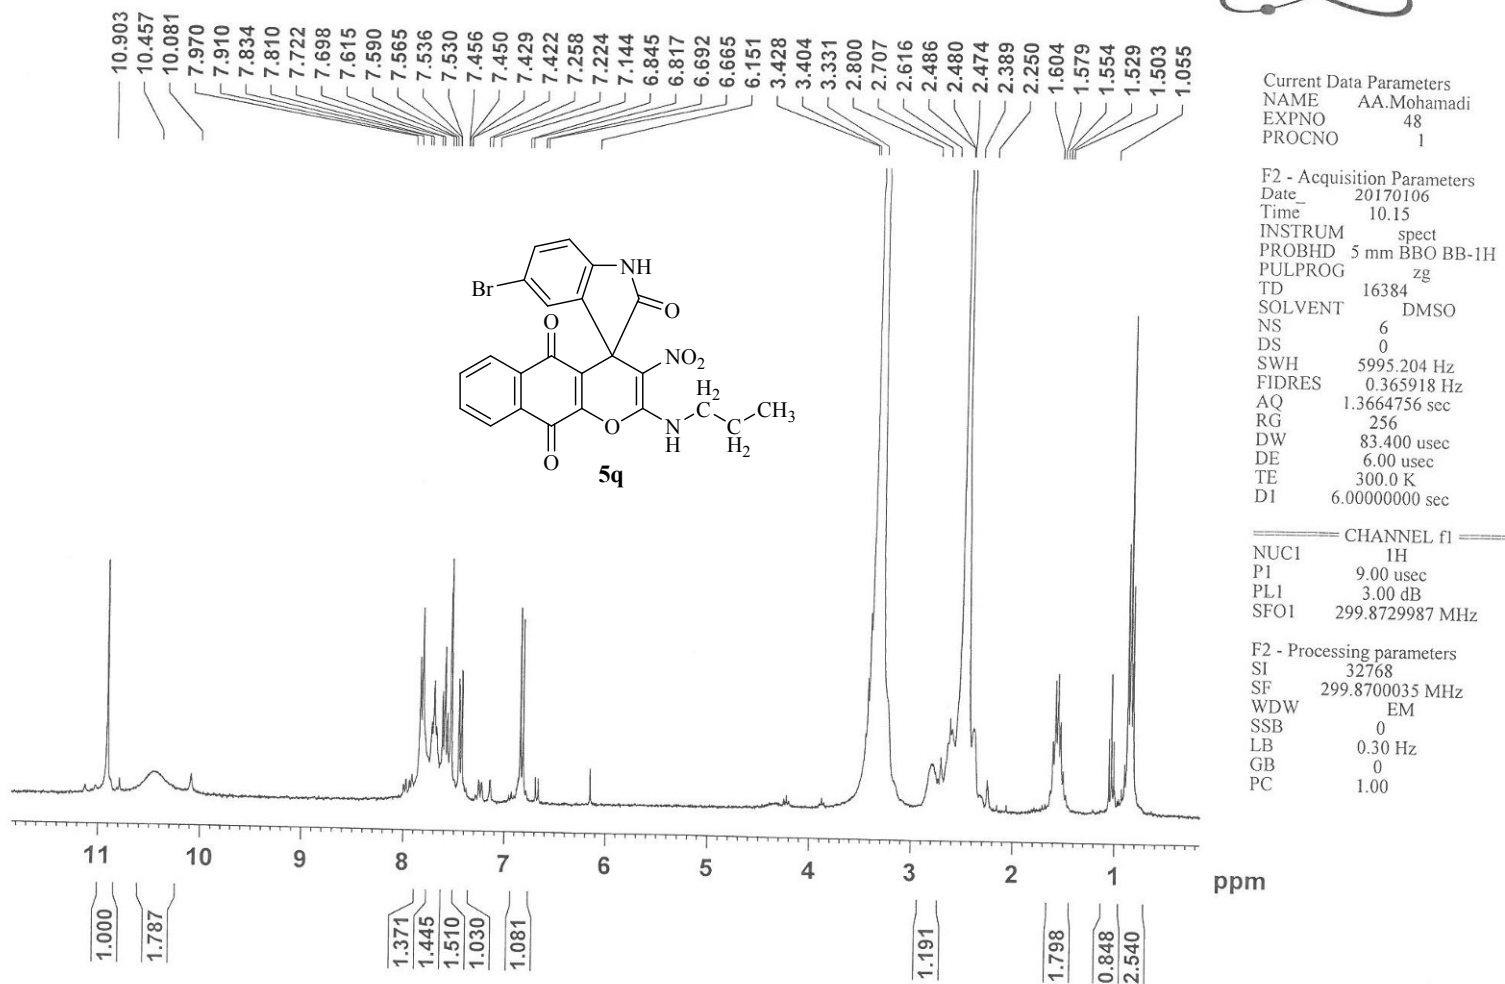

<sup>1</sup>H NMR of **5q**

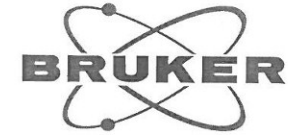

Current Data Parameters  
NAME AA.Mohamadi  
EXPNO 80  
PROCNO 1

F2 - Acquisition Parameters  
Date\_ 20170217  
Time\_ 9.54  
INSTRUM spect  
PROBHD 5 mm BBO BB-1H  
PULPROG zgpg  
TD 65536  
SOLVENT DMSO  
NS 1000  
DS 0  
SWH 17985.611 Hz  
FIDRES 0.274439 Hz  
AQ 1.8219508 sec  
RG 32768  
DW 27.800 usec  
DE 6.00 usec  
TE 300.0 K  
D1 4.0000000 sec  
d11 0.0300000 sec  
d12 0.0000200 sec

===== CHANNEL f1 =====  
NUC1 13C  
P1 14.00 usec  
PL1 -6.00 dB  
SFO1 75.4099117 MHz

===== CHANNEL f2 =====  
CPDPRG2 waltz16  
NUC2 1H  
PCPD2 80.00 usec  
PL2 3.00 dB  
PL12 23.00 dB  
PL13 23.00 dB  
SFO2 299.8711995 MHz

F2 - Processing parameters  
SI 32768  
SF 75.4023710 MHz  
WDW EM  
SSB 0  
LB 1.00 Hz  
GB 0  
PC 1.40

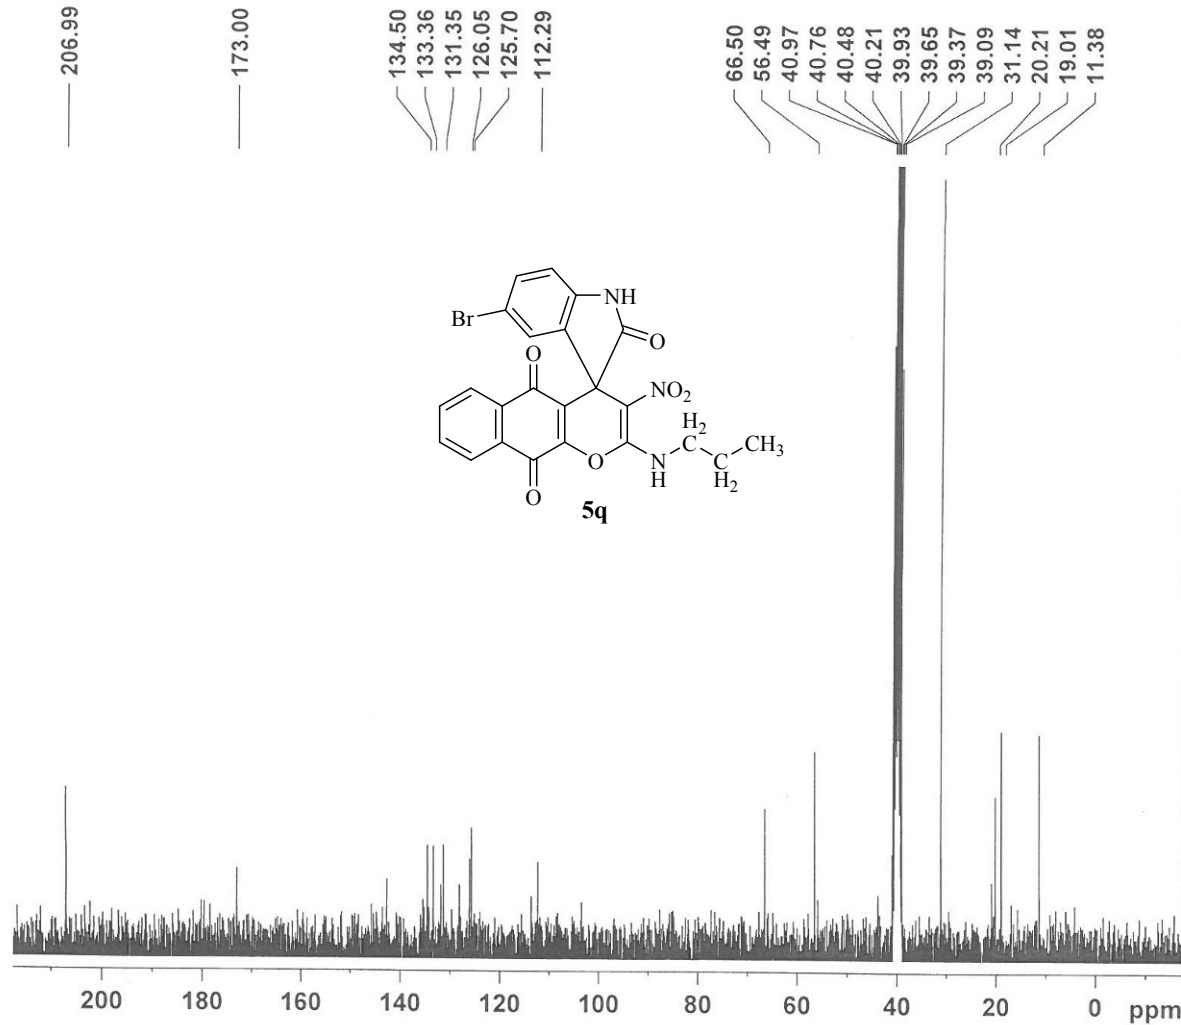

<sup>13</sup>C NMR of 5q
